# Supplementary material for: Combinatorial expression of γ-protocadherins regulates synaptic connectivity in the mouse neocortex
Source: eLife journal article supplement (doi:10.7554/elife.89532), 2023-08-31
Supplement: fig1-data1 [file seq_template.xlsx]

## Sheet: METADATA TEMPLATE 
# High-throughput sequencing metadata template. (Version: April 28, 2020)
# All fields in this template must be completed.
# See METADATA EXAMPLES in tabs at the foot of this page.
# Field names (in blue on this page) should not be edited. Hover over cells containing field names to view field content guidelines.
# Human data. If there are patient privacy concerns regarding making data fully public through GEO, please submit to NCBI's dbGaP (http://www.ncbi.nlm.nih.gov/gap/) database. dbGaP has controlled access mechanisms and is an appropriate resource for hosting sensitive patient data.
SERIES
# This section describes the overall study. Complete all fields.
title	Single cell profilling of pcdhg in neocortical neurons
summary	Diversified expression of gamma-protocadherins regulates synaptic specificity in the mouse neocortex
overall design	1
contributor	Yijun Zhu
contributor	Huatai Xu
contributor
contributor
supplementary file
SAMPLES
# Thoroughly describe each of the biological Samples under investigation. Tissue/cell type/cell line information is required.
# Include all biological and experimental variables in characteristics columns (for example, characteristics: tissue, characteristics: cell type, characteristics: treatment, characteristics: genotype, characteristics: disease state or any clinical variables, etc...)
# -> -> KEEP SCROLLING TO THE RIGHT FOR IMPORTANT FIELDS; RAW AND PROCESSED FILES MUST BE LISTED IN THIS SECTION -> ->
Sample name	title	source name	organism	characteristics: tissue	characteristics: strain	molecule	description	raw file	raw file
Sample 1	p11 mouse	neocortex	mus musculus	brain	C57/BL6	total RNA	gene expression	matrix.mtx.gz
Sample 1	p11 mouse	neocortex	mus musculus	brain	C57/BL6	target gene RNA	target gene	pcdh_result_UMI.csv
PROTOCOLS
# Protocols applicable to only a subset of Samples can be included as additional columns of the SAMPLES section above instead.
growth protocol
treatment protocol
extract protocol	single cell dissociation, FACs with DAPI, collect 20000 cells
library construction protocol	Chromium Single Cell V(D)J Enrichment Kit, Mouse T Cell, PN-1000071 Kit, change the primer with pcdhg specific primers
library strategy	5' end RNA seq
DATA PROCESSING PIPELINE
# Data processing steps include base-calling, alignment, filtering, peak-calling, generation of normalized abundance measurements etc…
# For each step provide a description, as well as software name, version, parameters, if applicable.
data processing step	get clean reads from Novagene
data processing step	Cellranger v3.0 for gene expression
data processing step	custom pipeline(matlab code)and Bowtie for pcdhg 5'end expression(output:pcdh_result_UMI.csv,simiilar form as mtx file)
data processing step
data processing step
genome build
processed data files format and content
# For each file listed in the "processed data file" columns of the SAMPLES section, provide additional information below.
PROCESSED DATA FILES
file name	file type	file checksum
barcodes.tsv.gz	tsv.gz
features.tsv.gz	tsv.gz
matrix.mtx.gz	mtx.gz
pcdh_result_UMI.csv	csv
RAW FILES
file name	file type	file checksum	instrument model	single or paired-end
			NovaSeq 6000
# For paired-end experiments, list the 2 (or more) fastq files from the same run. For SOLiD experiments, list the 4 file names (include "file name 3" and "file name 4" columns).
PAIRED-END EXPERIMENTS
file name 1	file name 2

## Sheet: EXAMPLE 1
# High-throughput sequencing metadata template.
# All fields in this template must be completed.
# See METADATA EXAMPLES in tabs at the foot of this page.
# Field names (in blue on this page) should not be edited. Hover over cells containing field names to view field content guidelines.
# Human data. If there are patient privacy concerns regarding making data fully public through GEO, please submit to NCBI's dbGaP (http://www.ncbi.nlm.nih.gov/gap/) database. dbGaP has controlled access mechanisms and is an appropriate resource for hosting sensitive patient data.
SERIES
# This section describes the overall study. Complete all fields.
title	Genome-wide maps of chromatin state in pluripotent and lineage-committed cells.
summary	We report the application of single-molecule-based sequencing technology for high-throughput profiling of histone modifications in mammalian cells. By obtaining over four billion bases of sequence from chromatin immunoprecipitated DNA, we generated genome-wide chromatin-state maps of mouse embryonic stem cells, neural progenitor cells and embryonic fibroblasts. We find that lysine 4 and lysine 27…
overall design	Examination of 2 different histone modifications in Neural progenitor cells.
contributor	John,B,Goode
contributor	Bradley,Smith
supplementary file
SAMPLES
# Thoroughly describe each of the biological Samples under investigation. Tissue/cell type/cell line information is required.
# Include all biological and experimental variables in characteristics columns (for example, characteristics: tissue, characteristics: cell type, characteristics: treatment, characteristics: genotype, characteristics: disease state or any clinical variables, etc...)
# -> -> KEEP SCROLLING TO THE RIGHT FOR IMPORTANT FIELDS; RAW AND PROCESSED FILES MUST BE LISTED IN THIS SECTION -> ->
Sample name	title	source name	organism	characteristics: cell type	characteristics: strain	characteristics: ChIP antibody	characteristics: treatment	characteristics: cell line	molecule	description	processed data file	processed data file	raw file	raw file
Sample 1	Neural progenitor cells - H3K4me2_rep1	Neural progenitor cells	Mus musculus	ES-derived neural progenitor cells	C57BL/6	H3K4me2 (Millipore, 07-030, lot 122116)	untreated		genomic DNA		H3K4me2.peaks_rep1.txt	H3K4me2_rep1.wig	080716_BI-EAS46_0001_209DH_L1.fastq.gz
Sample 2	Neural progenitor cells - H3K4me2_rep2	Neural progenitor cells	Mus musculus	ES-derived neural progenitor cells	C57BL/6	H3K4me2 (Millipore, 07-030, lot 122116)	untreated		genomic DNA		H3K4me2.peaks_rep2.txt	H3K4me2_rep2.wig	080716_BI-EAS46_0001_209DH_L4.fastq.gz
Sample 3	Neural progenitor cells - input DNA	Neural progenitor cells	Mus musculus	ES-derived neural progenitor cells	C57BL/6	none	untreated		genomic DNA			H3K4me2_input.wig	080717_BI-EAS46_0001_20DH_L5.fastq.gz
Sample 4	Neural progenitor cells - H3K4me2 - ABX-treated	Neural progenitor cells	Mus musculus	ES-derived neural progenitor cells	C57BL/6	H3K4me2 (Millipore, 07-030, lot 122116)	treated with ABX for 24 hours		genomic DNA		H3K4me2.peaks_ABX.txt	H3K4me2_rABX.wig	080716_BI-EAS46_0001_209DH_L6.fastq.gz
PROTOCOLS
# Protocols applicable to only a subset of Samples can be included as additional columns of the SAMPLES section above instead.
growth protocol	ES cell–derived NS cells were routinely generated by re-plating d 7 adherent neural differentiation cultures (typically 2–3 × 106 cells into a T75 flask) on uncoated plastic in NS-A medium (Euroclone, Milan, Italy) supplemented with modified N2 and 10 ng/ml of both EGF and FGF-2 (NS expansion medium).
treatment protocol	One replicate was ABX treated for 24 hours.
extract protocol	Lysates were clarified from sonicated nuclei and histone-DNA complexes were isolated with antibody.
library construction protocol	Libraries were prepared according to Illumina's instructions accompanying the DNA Sample Kit (Part# 0801-0303). Briefly, DNA was end-repaired using a combination of T4 DNA polymerase, E. coli DNA Pol I large fragment (Klenow polymerase) and T4 polynucleotide kinase. The blunt, phosphorylated ends were treated with Klenow fragment (32 to 52 exo minus) and dATP to yield a protruding 3- 'A' base for…
library strategy	ChIP-Seq
DATA PROCESSING PIPELINE
# Data processing steps include base-calling, alignment, filtering, peak-calling, generation of normalized abundance measurements etc…
# For each step provide a description, as well as software name, version, parameters, if applicable.
data processing step	Basecalls performed using CASAVA version 1.4
data processing step	ChIP-seq reads were aligned to the mm9 genome assembly using EasyAlign version 3.2 with the following configurations…
data processing step	Data were filtered using the following specifications…
data processing step	peaks were called using PeaksFind version 2.2 with the following setting: ChIP threshold (0.2), Enrichment Fold (2.5), Rescue Fold (3).
data processing step
genome build	mm9
processed data files format and content	wig files were generated using …; Scores represent …
processed data files format and content	peak text files
# For each file listed in the "processed data file" columns of the SAMPLES section, provide additional information below.
PROCESSED DATA FILES
file name	file type	file checksum
H3K4me2.peaks_rep1.txt	peak files	95cf1d1fa509d871b2ef0bb9fd734c3d
H3K4me2.peaks_rep2.txt	peak files	8ec6ee3cce10b970e5bfea4e35cdb231
H3K4me2.peaks_ABX.txt	peak files	f8fcd650914ff1a733956d6d06e8b543
H3K4me2_rep1.wig	wig	604fbb658413c559511eb6ad2bb1472e
H3K4me2_rep2.wig	wig	57cf1d1fa509d871b2ef0bb9fd734c3c
H3K4me2_input.wig	wig	8ec6ee3cce10b970e5bfea4e35cdb231
H3K4me2_rABX.wig	wig	f8fcd650914ff1a733956d6d06e8b543
# For each file listed in the "raw file" columns of the SAMPLES section, provide additional information below.
RAW FILES
file name	file type	file checksum	instrument model	single or paired-end
080716_BI-EAS46_0001_209DH_L1.fastq.gz	fastq	6cc6ee3cce10b970e5bfea4e35cdb280	Illumina HiSeq 2500	single
080716_BI-EAS46_0001_209DH_L4.fastq.gz	fastq	88ceb0e0d056dda9208a03acf9073571	Illumina HiSeq 2500	single
080717_BI-EAS46_0001_20DH_L5.fastq.gz	fastq	f2786fedc5106789a2af4014a0e74f00	Illumina HiSeq 2500	single
080716_BI-EAS46_0001_209DH_L6.fastq.gz	fastq	9a2af4014a0e74f00f2786fedc510678	Illumina HiSeq 2500	single
# For paired-end experiments, list the 2 (or more) fastq files from the same run. For SOLiD experiments, list the 4 file names (include "file name 3" and "file name 4" columns).
PAIRED-END EXPERIMENTS
file name 1	file name 2

## Sheet: EXAMPLE 2
# High-throughput sequencing metadata template.
# All fields in this template must be completed.
# See METADATA EXAMPLES in tabs at the foot of this page.
# Field names (in blue on this page) should not be edited. Hover over cells containing field names to view field content guidelines.
# Human data. If there are patient privacy concerns regarding making data fully public through GEO, please submit to NCBI's dbGaP (http://www.ncbi.nlm.nih.gov/gap/) database. dbGaP has controlled access mechanisms and is an appropriate resource for hosting sensitive patient data.
SERIES
# This section describes the overall study. Complete all fields.
title	Next Generation Sequencing Facilitates Quantitative Analysis of Wild Type and Nrl-/- Retinal Transcriptomes
summary	Purpose: Next-generation sequencing (NGS) has revolutionized systems-based analysis of cellular pathways. The goals of this study are to compare NGS-derived retinal transcriptome profiling (RNA-seq) to microarray and quantitative reverse transcription polymerase chain reaction (qRT–PCR) methods and to evaluate protocols for optimal high-throughput data analysis
summary	Methods: Retinal mRNA profiles of 21-day-old wild-type (WT) and neural retina leucine zipper knockout (Nrl−/−) mice were generated by deep sequencing, in triplicate, using Illumina GAIIx. The sequence reads that passed quality filters were analyzed at the transcript isoform level with two methods: Burrows–Wheeler Aligner (BWA) followed by ANOVA (ANOVA) and TopHat followed by Cufflinks. qRT–PCR va…
summary	Results: Using an optimized data analysis workflow, we mapped about 30 million sequence reads per sample to the mouse genome (build mm9) and identified 16,014 transcripts in the retinas of WT and Nrl−/− mice with BWA workflow and 34,115 transcripts with TopHat workflow. RNA-seq data confirmed stable expression of 25 known housekeeping genes, and 12 of these were validated with qRT–PCR. RNA-seq da…
summary	Conclusions: Our study represents the first detailed analysis of retinal transcriptomes, with biologic replicates, generated by RNA-seq technology. The optimized data analysis workflows reported here should provide a framework for comparative investigations of expression profiles. Our results show that NGS offers a comprehensive and more accurate quantitative and qualitative evaluation of mRNA co…
overall design	Retinal mRNA profiles of 21-day old wild type (WT) and Nrl-/- mice
contributor	Rebecca,A,Smith
contributor	David,Doe
supplementary file	Raw_gene_counts_matrix.txt
SAMPLES
# Thoroughly describe each of the biological Samples under investigation. Tissue/cell type/cell line information is required.
# Include all biological and experimental variables in characteristics columns (for example, characteristics: tissue, characteristics: cell type, characteristics: treatment, characteristics: genotype, characteristics: disease state or any clinical variables, etc...)
# -> -> KEEP SCROLLING TO THE RIGHT FOR IMPORTANT FIELDS; RAW AND PROCESSED FILES MUST BE LISTED IN THIS SECTION -> ->
Sample name	title	source name	organism	characteristics: strain	characteristics: tissue	characteristics: age	characteristics: genotype	characteristics: cell line	characteristics: treatment	molecule	description	processed data file	raw file	raw file
Sample 1	Retina WT rep1	Retina	Mus musculus	C57BL/6	retina	post natal day 21	wild type			total RNA		WT1.txt	080716_BI-EAS46_0001_209DH_L1_R1.fastq.gz	080716_BI-EAS46_0001_209DH_L1_R1.fastq.gz
Sample 2	Retina WT rep2	Retina	Mus musculus	C57BL/6	retina	post natal day 21	wild type			total RNA		WT2.txt	080716_BI-EAS46_0001_209DH_L2_R1.fastq.gz	080716_BI-EAS46_0001_209DH_L2_R1.fastq.gz
Sample 3	Retina Nrl-KO rep1	Retina	Mus musculus	C57BL/6	retina	post natal day 21	Nrl-/-			total RNA		mutant1.txt	080717_BI-EAS46_1.fastq.gz	080717_BI-EAS46_2.fastq.gz
Sample 4	Retina Nrl-KO rep2	Retina	Mus musculus	C57BL/6	retina	post natal day 21	Nrl-/-			total RNA		mutant2.txt	080718_BI-EAS49_1.fastq.gz	080718_BI-EAS49_2.fastq.gz
PROTOCOLS
# Protocols applicable to only a subset of Samples can be included as additional columns of the SAMPLES section above instead.
growth protocol
treatment protocol
extract protocol	Retinas were removed, flash frozen on dry ice, and RNA was harvested using Trizol reagent. Illumina TruSeq RNA Sample Prep Kit (Cat#FC-122-1001) was used with 1 ug of total RNA for the construction of sequencing libraries.
library construction protocol	RNA libraries were prepared for sequencing using standard Illumina protocols
library strategy	RNA-Seq
DATA PROCESSING PIPELINE
# Data processing steps include base-calling, alignment, filtering, peak-calling, generation of normalized abundance measurements etc…
# For each step provide a description, as well as software name, version, parameters, if applicable.
data processing step	Illumina Casava1.7 software used for basecalling.
data processing step	Sequenced reads were trimmed for adaptor sequence, and masked for low-complexity or low-quality sequence, then mapped to mm8 whole genome using bowtie v0.12.2 with parameters -q -p 4 -e 100 -y -a -m 10 --best --strata
data processing step	Reads Per Kilobase of exon per Megabase of library size (RPKM) were calculated using a protocol from Chepelev et al., Nucleic Acids Research, 2009. In short, exons from all isoforms of a gene were merged to create one meta-transcript. The number of reads falling in the exons of this meta-transcript were counted and normalized by the size of the meta-transcript and by the size of the library.
data processing step
data processing step
genome build	mm9
processed data files format and content	tab-delimited text files include FPKM values for each Sample ...
processed data files format and content	Matrix table with raw gene counts for every gene and every sample
# For each file listed in the "processed data file" columns of the SAMPLES section, provide additional information below.
PROCESSED DATA FILES
file name	file type	file checksum
WT.txt	abundance measurements	d8fcd650914ff1a733956d6d06e8b091
WT2.txt	abundance measurements	abcdef123456789abc123456789abc
mutant1.txt	abundance measurements	95cf1d1fa509d871b2ef0bb9fd734c3d
mutant2.txt	abundance measurements	0wd6ee3cce10b970e5bfea4e35cdb987
Raw_gene_counts_matrix.txt	raw counts	57cf1d1fa509d871b2ef0bb9fd734c3c
# For each file listed in the "raw file" columns of the SAMPLES section, provide additional information below.
RAW FILES
file name	file type	file checksum	instrument model	single or paired-end
080716_BI-EAS46_0001_209DH_L1_R1.fastq.gz	fastq	6cc6ee3cce10b970e5bfea4e35cdb280	Illumina HiSeq 2000	paired-end
080716_BI-EAS46_0001_209DH_L1_R2.fastq.gz	fastq	88ceb0e0d056dda9208a03acf9073571	Illumina HiSeq 2000	paired-end
080716_BI-EAS46_0001_209DH_L2_R1.fastq.gz	fastq	f2786fedc5106789a2af4014a0e74f00	Illumina HiSeq 2000	paired-end
080716_BI-EAS46_0001_209DH_L2_R2.fastq.gz	fastq	d8fcd650914ff1a733956d6d06e8b091	Illumina HiSeq 2000	paired-end
080717_BI-EAS46_1.fastq.gz	fastq	03839cca2e797b28b9f9371f7b9ca680	Illumina HiSeq 2000	paired-end
080717_BI-EAS46_2.fastq.gz	fastq	604fbb658413c559511eb6ad2bb1472e	Illumina HiSeq 2000	paired-end
080718_BI-EAS49_1.fastq.gz	fastq	57cf1d1fa509d871b2ef0bb9fd734c3c	Illumina HiSeq 2000	paired-end
080718_BI-EAS49_2.fastq.gz	fastq	e5718e1a97690d410464f24f37aaed39	Illumina HiSeq 2000	paired-end
# For paired-end experiments, list the 2 (or more) fastq files from the same run. For SOLiD experiments, list the 4 file names (include "file name 3" and "file name 4" columns).
PAIRED-END EXPERIMENTS
file name 1	file name 2
080716_BI-EAS46_0001_209DH_L1_R1.fastq.gz	080716_BI-EAS46_0001_209DH_L1_R1.fastq.gz
080716_BI-EAS46_0001_209DH_L2_R1.fastq.gz	080716_BI-EAS46_0001_209DH_L2_R1.fastq.gz
080717_BI-EAS46_1.fastq.gz	080717_BI-EAS46_2.fastq.gz
080718_BI-EAS49_1.fastq.gz	080718_BI-EAS49_2.fastq.gz
