# Supplementary material for: Combinatorial expression of γ-protocadherins regulates synaptic connectivity in the mouse neocortex
Source: eLife journal article supplement (doi:10.7554/elife.89532), 2023-08-31
Supplement: fig2-figsupp2-data1 [file RT-qPCR for testing pcdha Knock out efficiency.xlsx]

## Sheet: Sheet1
		normalization
20230908	pa express c2			genotype
Sample 12	0.00134002	0.952457		het	0.00206271	wt
Sample 13	0.00206271	1.46613		wt	0.00111634	wt
Sample 17	0.000326695	0.232207		ko	0.00104167	wt
Sample 18	0.00157782	1.12148		het	0.00140691
Sample 19	0.00122662	0.871852		het
Sample 20	0.000411356	0.292383		ko
Sample 21	0.000544886	0.387293		ko
Sample 22	0.000765742	0.544272		het
Sample 23	0.00123969	0.881148		het
Sample 24	0.00111634	0.793473		wt
Sample 75	0.00104167	0.740398		wt
20230913	expression c2			genotype
30	0.00388844	0.994139		het	0.00435811	wt
31	0.00435811	1.11422		wt	0.00490646	wt
32	0.000766326	0.195923		ko	0.00286082	wt
33	0.00326276	0.834174		het	0.00465402	wt
34	0.00490646	1.25441		wt	0.00277738	wt
35	0.00286082	0.731414		wt	0.00391136
36	0.00122736	0.313794		het
37	0.00465402	1.18987		wt
38	0.00187619	0.479677		het
39	0.00277738	0.710081		wt
40	0.00101719	0.260059		ko

## Sheet: Sheet2
Sample num	GAPDH Ct	pcdha Ct	dCt	genotype
Sample 12	17.5333	27.0769	0.00134002	het
Sample 13	17.4034	26.3246	0.00206271	wt
Sample 17	17.2987	28.8784	0.000326695	ko
Sample 18	17.4922	26.8	0.00157782	het
Sample 19	18.0166	27.6877	0.00122662	het
Sample 20	17.3279	28.5752	0.000411356	ko
Sample 21	17.3434	28.1851	0.000544886	ko
Sample 22	16.4854	26.8362	0.000765742	het
Sample 23	17.3117	26.9675	0.00123969	het
Sample 24	16.7801	26.5871	0.00111634	wt
Sample 75	17.2019	27.1087	0.00104167	wt
Sample 30	18.8617	26.8682	0.00388844	het
Sample 31	17.7715	25.6136	0.00435811	wt
Sample 32	17.934	28.2838	0.000766326	ko
Sample 33	17.9193	26.179	0.00326276	het
Sample 34	18.2597	25.9308	0.00490646	wt
Sample 35	17.5012	25.9505	0.00286082	wt
Sample 36	17.2654	26.9356	0.00122736	het
Sample 37	17.9294	25.6767	0.00465402	wt
Sample 38	17.7501	26.8081	0.00187619	het
Sample 39	17.5969	26.089	0.00277738	wt
Sample 40	18.0521	27.9933	0.00101719	ko
