# Supplementary material for: Combinatorial expression of γ-protocadherins regulates synaptic connectivity in the mouse neocortex
Source: eLife journal article supplement (doi:10.7554/elife.89532), 2023-08-31
Supplement: fig3-data1 [file Fig.3 A B RT-qPCR for testing overexpression level.xlsx]

## Sheet: Sheet1
Row cp value
Sample_property_replicates	pcdhgb1	pcdhga9	pcdhgc3	pcdhga2	pcdhga10	pcdhgb2	pcdhgb6	pcdhga8	pcdhga11	pcdhgc4	GAPDH_1	GAPDH_2
1_Ctrl region_1	27.13	26.56	25.8	27.99	27.14	26.83	24.21	32.64	25.44	28.65	18.54	17.91
1_Ctrl region_2	27.17	26.6	25.92	27.78	27.16	26.88	24.29	32.12	25.35	28.45	18.54	18.16
1_OE region_1	25.56	26.99	26.07	25.31	26.51	24.63	22.48	32.02	25.89	28.92	18.71	18.21
1_OE region_2	25.34	26.94	25.91	25.08	26.25	24.63	22.68	31.5	25.68	29.01	18.88	18.54
2_Ctrl region_1	27.47	27.1	26.04	28.64	28.62	27.25	25.63	33.4	25.7	29.28	18.83	18.53
2_Ctrl region_2	27.55	26.91	25.91	28.42	29.02	27.36	25.06	32.72	25.74	29.02	19.03	18.57
2_OE region_1	25.32	26.71	25.67	25.06	26.56	24.3	22.09	31.3	25.9	28.85	18.77	18.3
2_OE region_2	25.21	26.9	25.77	24.96	26.69	24.68	22.53	31.07	25.8	29.49	18.8	18.62
3_Ctrl region_1	27.77	26.86	26.44	28.85	27.79	27.15	24.57	32.9	25.92	29.1	18.89	18.63
3_Ctrl region_2	27.89	26.98	26.32	27.86	27.93	26.91	24.93	32.34	26.07	29.17	19.03	18.55
3_OE region_1	26.47	26.81	25.95	30.24	26.9	25.83	23.51	31.84	25.97	28.77	18.76	18.53
3_OE region_2	26.13	26.7	26.1	26.28	26.6	25.99	23.54	31.7	25.84	28.89	18.84	18.34
4_Ctrl region_1	27.65	26.87	26.5	28.18	27.77	27.01	24.34	32.7	25.91	28.59	19.02	18.46
4_Ctrl region_2	27.5	26.96	26.33	28.06	27.57	27.28	24.94	32.16	25.93	28.71	18.99	18.6
4_OE region_1	26.65	27.57	26.33	26.32	26.81	25.53	23.24	32.07	26.29	28.7	18.98	18.54
4_OE region_2	26.56	27.53	26.32	26.21	26.31	25.58	23.03	31.88	26.27	29.28	19.08	18.48
5_Ctrl region_1	27.65	27.22	26.08	28.68	28.22	27.11	24.62	32.69	25.8	28.97	19.01	18.62
5_Ctrl region_2	27.59	27.05	26.12	28.3	27.6	27.56		32.92	26.18	28.8	19.16	18.64
5_OE region_1	26.21	27.07	26.55	26.43	26.67	25.46	23.02	31.94	25.86	29.58	19.08	18.75
5_OE region_2	26.04	27.26	26.61	25.74	26.9	25.01	23.11	31.65	25.84	29.08	19.24	18.82
6_Ctrl region_1	27.54	26.79	26.23	29.1	27.85	26.95	24.97	32.68	25.87	28.87	18.98	18.59
6_Ctrl region_2	27.48	26.72	26.56	28.55	27.57	27.21	25.31	33.38	25.81	28.92	19.01	18.67
6_OE region_1	26.74	26.58	25.93	27.15	26.83	26	23.83	32.1	25.63	29.1	18.9	18.56
6_OE region_2	26.64	26.94	26.04	26.31	26.73	26.17	23.28	32.17	25.56	28.5	19.02	18.52
notes:	pcdhgb1,pcdhga9,pcdhgc3,GAPDH_1 were in Bunch1;
	pcdhga2,pcdhga10,pcdhgb2,pcdhgb6,pcdhga8,pcdhga11,pcdhgc4,GAPDH_2 were in Bunch2
