# Supplementary material for: Combinatorial expression of γ-protocadherins regulates synaptic connectivity in the mouse neocortex
Source: eLife journal article supplement (doi:10.7554/elife.89532), 2023-08-31
Supplement: fig3-figsupp1-data1 [file summary.xlsx]

## Sheet: Sheet1
fig name	cell number	total	green only	green+red	red only
6p-1		210	10	200	0
6p-2		161	8	153	0
6p-3		239	9	229	1
6p-4		282	18	264	0
		892	45	846	1
	possiblity	red in total		red only in total
		0.949552		0.00112108
