# Supplementary material for: Combinatorial expression of γ-protocadherins regulates synaptic connectivity in the mouse neocortex
Source: eLife journal article supplement (doi:10.7554/elife.89532), 2023-08-31
Supplement: fig4-data1 [file Fig.4D&S1 Electrophysiology data (pair recording).xlsx]

## Sheet: 4 plasmid-100%
Date	Age		total	Uni-direction	Bi-direction		experimenter		plasmids used	4X red
2021.4.28	p10	G-G	7	0	0		YJ Zhu			CAGGS-PCDHga2-2A-mRuby3
		G-R	19	0	0		YJ Zhu			CAGGS-PCDHga10-2A-mRuby3
		R-R	10	0	0		YJ Zhu			CAGGS-PCDHgb2-2A-mRuby3
		G-N	7	0	0		YJ Zhu			CAGGS-PCDHgb6-2A-mRuby3
		R-N	7	0	0		YJ Zhu
		N-N	0	0	0		YJ Zhu			4X green
2021.4.29	p11	G-G	4	0	0		YJ Zhu			CAGGS-PCDHga2-2A-mNeonGreen
		G-R	16	0	0		YJ Zhu			CAGGS-PCDHga10-2A-mNeonGreen
		R-R	13	1	0		YJ Zhu			CAGGS-PCDHgb2-2A-mNeonGreen
		G-N	9	0	0		YJ Zhu			CAGGS-PCDHgb6-2A-mNeonGreen
		R-N	12	0	0		YJ Zhu
		N-N	1	0	0		YJ Zhu
2021.4.30	p12	G-G	3	0	0		YJ Zhu
		G-R	9	0	0		YJ Zhu
		R-R	3	0	0		YJ Zhu		Total	connection	Uni-direction	Bi-direction		connection rate	Uni-direction rate	Bi-direction	G=GFP+ cells, R=RFP+ cells, N=no-flourence cells
		G-N	9	1	0		YJ Zhu	G-G	66	3	3	0		0.0454545	0.0454545	0
		R-N	13	3	0		YJ Zhu	G-R	134	5	5	0		0.0373134	0.0373134	0
		N-N	4	1	0		YJ Zhu	R-R	84	1	1	0		0.0119048	0.0119048	0
2021.5.7	p10	G-G	0	0	0		YJ Zhu	G-N	93	7	6	1		0.0752688	0.0645161	0.0107527
		G-R	8	0	0		YJ Zhu	R-N	94	9	9	0		0.0957447	0.0957447	0
		R-R	12	0	0		YJ Zhu	N-N	17	2	1	1		0.117647	0.0588235	0.0588235
		G-N	2	0	0		YJ Zhu
		R-N	8	0	0		YJ Zhu
		N-N	0	0	0		YJ Zhu	same color	150	4	4	0		0.0266667	0.0266667	0
2021.5.19	p11	G-G	7	1	0		YJ Zhu
		G-R	16	2	0		YJ Zhu	C-N	187	16	15	1		0.0855615	0.0802139	0.00534759
		R-R	14	0	0		YJ Zhu
		G-N	7	0	1		YJ Zhu
		R-N	6	0	0		YJ Zhu			Notes
		N-N	0	0	0		YJ Zhu			1 or 2 mice were used in each day
2021.5.20	p12	G-G	13	2	0		YJ Zhu			G=GFP+ cells
		G-R	11	1	0		YJ Zhu			R=RFP+ cells
		R-R	4	0	0		YJ Zhu			N=no flourence cells
		G-N	8	2	0		YJ Zhu			C=G+R(GFP+ or RFP+ cells)
		R-N	8	1	0		YJ Zhu			same color= G-G+R-R
		N-N	1	0	0		YJ Zhu
2021.5.21	p13	G-G	5	0	0		YJ Zhu
		G-R	19	0	0		YJ Zhu
		R-R	8	0	0		YJ Zhu
		G-N	5	0	0		YJ Zhu
		R-N	5	1	0		YJ Zhu
		N-N	0	0	0		YJ Zhu
2021.5.28	p10	G-G	4	0	0		YJ Zhu
		G-R	17	0	0		YJ Zhu
		R-R	8	0	0		YJ Zhu
		G-N	7	0	0		YJ Zhu
		R-N	10	2	0		YJ Zhu
		N-N	0	0	0		YJ Zhu
2021.5.29	p11	G-G	9	0	0		YJ Zhu
		G-R	11	2	0		YJ Zhu
		R-R	4	0	0		YJ Zhu
		G-N	9	1	0		YJ Zhu
		R-N	8	1	0		YJ Zhu
		N-N	1	0	1		YJ Zhu
2021.5.30	p12	G-G	12	0	0		YJ Zhu
		G-R	0	0	0		YJ Zhu
		R-R	6	0	0		YJ Zhu
		G-N	16	0	0		YJ Zhu
		R-N	8	0	0		YJ Zhu
		N-N	3	0	0		YJ Zhu
2021.6.4	p12	G-G	2	0	0		YJ Zhu
		G-R	8	0	0		YJ Zhu
		R-R	2	0	0		YJ Zhu
		G-N	14	2	0		YJ Zhu
		R-N	9	1	0		YJ Zhu
		N-N	7	0	0		YJ Zhu

## Sheet: 6plasmid-50%
Date	Age		total	Uni-direction	Bi-direction		experimenter		plasmids used	4X red
20191226	p10	G-G	0	0	0		YJ Zhu			CAGGS-PCDHga2-2A-mRuby3
		G-R	1	0	1		YJ Zhu			CAGGS-PCDHga10-2A-mRuby3
		R-R	0	0	0		YJ Zhu			CAGGS-PCDHgb2-2A-mRuby3
		G-N	2	0	0		YJ Zhu			CAGGS-PCDHgb6-2A-mRuby3
		R-N	2	0	0		YJ Zhu
		N-N	1	0	0		YJ Zhu			4X green
20191230	p14	G-G	0	0	0		YJ Zhu			CAGGS-PCDHga2-2A-mNeonGreen
		G-R	3	0	0		YJ Zhu			CAGGS-PCDHgb2-2A-mNeonGreen
		R-R	1	0	0		YJ Zhu			CAGGS-PCDHga8-2A-mNeonGreen
		G-N	2	0	0		YJ Zhu			CAGGS-PCDHgb1-2A-mNeonGreen
		R-N	3	0	0		YJ Zhu
		N-N	0	0	0		YJ Zhu			overlap=PCDHga2 PCDHb2
20191231	p15	G-G	1	0	0		YJ Zhu			overlap rate=50%
		G-R	10	1	0		YJ Zhu
		R-R	4	0	0		YJ Zhu		Total	connection	Uni-direction	Bi-direction		connection rate	Uni-direction rate	Bi-direction	G=GFP+ cells, R=RFP+ cells, N=no-flourence cells
		G-N	7	2	0		YJ Zhu	G-G	98	2	2	0		0.0204082	0.0204082	0
		R-N	10	3	0		YJ Zhu	G-R	165	14	12	2		0.0848485	0.0727273	0.0121212
		N-N	2	1	0		YJ Zhu	R-R	83	4	4	0		0.0481928	0.0481928	0
20200104	p11	G-G	7	1	0		YJ Zhu	G-N	124	12	11	1		0.0967742	0.0887097	0.00806452
		G-R	12	2	0		YJ Zhu	R-N	102	16	16	0		0.156863	0.156863	0
		R-R	6	1	0		YJ Zhu	N-N	23	2	2	0		0.0869565	0.0869565	0
		G-N	16	2	0		YJ Zhu
		R-N	16	2	0		YJ Zhu
		N-N	4	0	0		YJ Zhu	same color	181	6	6	0		0.0331492	0.0331492	0
20200416	p10	G-G	12	1	0		YJ Zhu
		G-R	12	0	0		YJ Zhu	C-N	226	28	27	1		0.123894	0.119469	0.00442478
		R-R	0	0	0		YJ Zhu
		G-N	12	1	0		YJ Zhu			Notes
		R-N	4	0	0		YJ Zhu			1 or 2 mice were used in each day
		N-N	1	0	0		YJ Zhu			G=GFP+ cells
20200417	p11	G-G	4	0	0		YJ Zhu			R=RFP+ cells
		G-R	8	0	0		YJ Zhu			N=no flourence cells
		R-R	1	0	0		YJ Zhu			C=G+R(GFP+ or RFP+ cells)
		G-N	8	1	0		YJ Zhu			same color= G-G+R-R
		R-N	5	0	0		YJ Zhu
		N-N	1	0	0		YJ Zhu
20200502	p11	G-G	4	0	0		YJ Zhu
		G-R	19	2	0		YJ Zhu
		R-R	8	0	0		YJ Zhu
		G-N	3	0	0		YJ Zhu
		R-N	5	1	0		YJ Zhu
		N-N	0	0	0		YJ Zhu
20200503	p12	G-G	12	0	0		YJ Zhu
		G-R	6	1	0		YJ Zhu
		R-R	0	0	0		YJ Zhu
		G-N	14	1	0		YJ Zhu
		R-N	2	0	0		YJ Zhu
		N-N	2	0	0		YJ Zhu
20200505	p14	G-G	7	0	0		YJ Zhu
		G-R	17	0	0		YJ Zhu
		R-R	6	1	0		YJ Zhu
		G-N	6	1	0		YJ Zhu
		R-N	5	1	0		YJ Zhu
		N-N	0	0	0		YJ Zhu
20200507	p11	G-G	4	0	0		YJ Zhu
		G-R	13	1	0		YJ Zhu
		R-R	4	0	0		YJ Zhu
		G-N	3	0	0		YJ Zhu
		R-N	4	0	0		YJ Zhu
		N-N	0	0	0		YJ Zhu
20200508	p12	G-G	5	0	0		YJ Zhu
		G-R	16	2	0		YJ Zhu
		R-R	2	0	0		YJ Zhu
		G-N	10	0	0		YJ Zhu
		R-N	12	4	0		YJ Zhu
		N-N	3	1	0		YJ Zhu
20200515	p11	G-G	4	0	0		YJ Zhu
		G-R	16	1	1		YJ Zhu
		R-R	8	0	0		YJ Zhu
		G-N	4	2	0		YJ Zhu
		R-N	8	1	0		YJ Zhu
		N-N	6	0	0		YJ Zhu
20200516	p12	G-G	6	0	0		YJ Zhu
		G-R	17	1	0		YJ Zhu
		R-R	5	0	0		YJ Zhu
		G-N	14	1	0		YJ Zhu
		R-N	11	0	0		YJ Zhu
		N-N	2	0	0		YJ Zhu
20200521	p10	G-G	9	0	0		YJ Zhu
		G-R	4	1	0		YJ Zhu
		R-R	16	1	0		YJ Zhu
		G-N	4	0	0		YJ Zhu
		R-N	6	2	0		YJ Zhu
		N-N	0	0	0		YJ Zhu
20200522	p11	G-G	10	0	0		YJ Zhu
		G-R	8	0	0		YJ Zhu
		R-R	16	1	0		YJ Zhu
		G-N	11	0	0		YJ Zhu
		R-N	4	0	0		YJ Zhu
		N-N	1	0	0		YJ Zhu
20200523	p12	G-G	13	0	0		YJ Zhu
		G-R	3	0	0		YJ Zhu
		R-R	6	0	0		YJ Zhu
		G-N	8	0	1		YJ Zhu
		R-N	5	2	0		YJ Zhu
		N-N	0	0	0		YJ Zhu

## Sheet: 9plasmid-20%
Date	Age		total	Uni-direction	Bi-direction	gap-juntion	experimenter		plasmids used	5X red
20200606	p11	G-G	7	0	0		YJ Zhu			CAGGS-PCDHgb2-2A-mRuby3
		G-R	11	0	0		YJ Zhu			CAGGS-PCDHgb6-2A-mRuby3
		R-R	1	0	0		YJ Zhu			CAGGS-PCDHga4-2A-mRuby3
		G-N	3	0	0		YJ Zhu			CAGGS-PCDHga9-2A-mRuby3
		R-N	1	0	0		YJ Zhu			CAGGS-PCDHga11-2A-mRuby3
		N-N	0	0	0		YJ Zhu			5X green
20200607	p12	G-G	0	0	0		YJ Zhu			CAGGS-PCDHga2-2A-mNeonGreen
		G-R	5	1	0		YJ Zhu			CAGGS-PCDHgb2-2A-mNeonGreen
		R-R	4	0	0		YJ Zhu			CAGGS-PCDHga6-2A-mNeonGreen
		G-N	3	0	0		YJ Zhu			CAGGS-PCDHga8-2A-mNeonGreen
		R-N	8	0	0		YJ Zhu			CAGGS-PCDHgb1-2A-mNeonGreen
		N-N	1	0	0		YJ Zhu			overlap=PCDHb2
20200609	p14	G-G	7	0	0		YJ Zhu			overlap rate=20%
		G-R	19	1	0		YJ Zhu
		R-R	6	0	0		YJ Zhu		Total	connection	Uni-direction	Bi-direction		connection rate	Uni-direction rate	Bi-direction	G=GFP+ cells, R=RFP+ cells, N=no-flourence cells
		G-N	7	0	1		YJ Zhu	G-G	40	0	0	0		0	0	0
		R-N	7	2	0		YJ Zhu	G-R	117	12	12	0		0.102564	0.102564	0
		N-N	0	0	0		YJ Zhu	R-R	44	2	2	0		0.0454545	0.0454545	0
20200617	p11	G-G	7	0	0		YJ Zhu	G-N	44	7	5	2		0.159091	0.113636	0.0454545
		G-R	22	1	0		YJ Zhu	R-N	52	5	5	0		0.0961538	0.0961538	0
		R-R	7	0	0		YJ Zhu	N-N	5	0	0	0		0	0	0
		G-N	7	1	0		YJ Zhu
		R-N	7	1	0		YJ Zhu
		N-N	1	0	0		YJ Zhu	same color	84	2	2	0		0.0238095	0.0238095	0
20200618	p12	G-G	5	0	0		YJ Zhu
		G-R	13	2	0		YJ Zhu	C-N	96	12	10	2		0.125	0.104167	0.0208333
		R-R	4	0	0		YJ Zhu
		G-N	6	0	0		YJ Zhu			Notes
		R-N	2	0	0		YJ Zhu			1 or 2 mice were used in each day
		N-N	1	0	0		YJ Zhu			G=GFP+ cells
20200623	p11	G-G	4	0	0		YJ Zhu			R=RFP+ cells
		G-R	22	2	0		YJ Zhu			N=no flourence cells
		R-R	10	1	0		YJ Zhu			C=G+R(GFP+ or RFP+ cells)
		G-N	6	0	0		YJ Zhu			same color= G-G+R-R
		R-N	8	0	0		YJ Zhu
		N-N	0	0	0		YJ Zhu
20200624	p12	G-G	3	0	0	1	YJ Zhu
		G-R	14	5	0		YJ Zhu
		R-R	8	1	0		YJ Zhu
		G-N	7	3	1		YJ Zhu
		R-N	12	2	0		YJ Zhu
		N-N	1	0	0		YJ Zhu
20200703	p11	G-G	7	0	0		YJ Zhu
		G-R	11	0	0		YJ Zhu
		R-R	4	0	0		YJ Zhu
		G-N	5	1	0		YJ Zhu
		R-N	7	0	0		YJ Zhu
		N-N	1	0	0		YJ Zhu

## Sheet: 8plasmid-0%
Date	Age		total	Uni-direction	Bi-direction				plasmids used	4X red-3
20200708	p13	G-G	4	0	0		YJ Zhu			CAGGS-PCDHgb6-2A-mRuby3
		G-R	9	1	0		YJ Zhu			CAGGS-PCDHga4-2A-mRuby3
		R-R	2	0	0		YJ Zhu			CAGGS-PCDHga9-2A-mRuby3
		G-N	9	0	1		YJ Zhu			CAGGS-PCDHga11-2A-mRuby3
		R-N	9	1	0		YJ Zhu
		N-N	1	0	0		YJ Zhu			4X green-3
20200709	p14	G-G	3	0	0		YJ Zhu			CAGGS-PCDHga2-2A-mNeonGreen
		G-R	3	0	0		YJ Zhu			CAGGS-PCDHga6-2A-mNeonGreen
		R-R	0	0	0		YJ Zhu			CAGGS-PCDHga8-2A-mNeonGreen
		G-N	3	0	0		YJ Zhu			CAGGS-PCDHgb1-2A-mNeonGreen
		R-N	1	0	0		YJ Zhu
		N-N	0	0	0		YJ Zhu			overlap=none
20200713	p11	G-G	6	0	0		YJ Zhu			overlap rate=0%
		G-R	16	0	0		YJ Zhu
		R-R	9	0	0		YJ Zhu		Total	connection	Uni-direction	Bi-direction		connection rate	Uni-direction rate	Bi-direction	G=GFP+ cells, R=RFP+ cells, N=no-flourence cells
		G-N	3	0	0		YJ Zhu	G-G	38	0	0	0		0	0	0
		R-N	6	0	0		YJ Zhu	G-R	114	12	10	2		0.105263	0.0877193	0.0175439
		N-N	1	0	0		YJ Zhu	R-R	53	3	3	0		0.0566038	0.0566038	0
20200715	p13	G-G	3	0	0		YJ Zhu	G-N	53	7	6	1		0.132075	0.113208	0.0188679
		G-R	10	1	0		YJ Zhu	R-N	73	6	6	0		0.0821918	0.0821918	0
		R-R	3	0	0		YJ Zhu	N-N	7	0	0	0		0	0	0
		G-N	1	1	0		YJ Zhu
		R-N	2	1	0		YJ Zhu	same color	91	3	3	0		0.032967	0.032967	0
		N-N	0	0	0		YJ Zhu
20200716	p14	G-G	7	0	0		YJ Zhu	C-N	126	13	12	1		0.103175	0.0952381	0.00793651
		G-R	17	3	0		YJ Zhu
		R-R	8	0	0		YJ Zhu
		G-N	6	0	0		YJ Zhu			Notes
		R-N	7	0	0		YJ Zhu			1 or 2 mice were used in each day
		N-N	0	0	0		YJ Zhu			G=GFP+ cells
20200729	p11	G-G	7	0	0		YJ Zhu			R=RFP+ cells
		G-R	15	0	0		YJ Zhu			N=no flourence cells
		R-R	5	1	0		YJ Zhu			C=G+R(GFP+ or RFP+ cells)
		G-N	11	2	0		YJ Zhu			same color= G-G+R-R
		R-N	11	1	0		YJ Zhu
		N-N	2	0	0		YJ Zhu
20200730	p12	G-G	1	0	0		YJ Zhu
		G-R	13	0	1		YJ Zhu
		R-R	11	0	0		YJ Zhu
		G-N	3	0	0		YJ Zhu
		R-N	9	1	0		YJ Zhu
		N-N	0	0	0		YJ Zhu
20200731	p13	G-G	0	0	0		YJ Zhu
		G-R	10	2	0		YJ Zhu
		R-R	9	2	0		YJ Zhu
		G-N	6	1	0		YJ Zhu
		R-N	16	1	0		YJ Zhu
		N-N	2	0	0		YJ Zhu
20200805	p11	G-G	3	0	0		YJ Zhu
		G-R	16	3	1		YJ Zhu
		R-R	6	0	0		YJ Zhu
		G-N	7	2	0		YJ Zhu
		R-N	10	1	0		YJ Zhu
		N-N	0	0	0		YJ Zhu
20200806	p12	G-G	4	0	0		YJ Zhu
		G-R	5	0	0		YJ Zhu
		R-R	0	0	0		YJ Zhu
		G-N	4	0	0		YJ Zhu
		R-N	2	0	0		YJ Zhu
		N-N	1	0	0		YJ Zhu

## Sheet: control
Date	Age		total	Uni-direction	Bi-direction				plasmids used	red
20201007	p10	G-G	6	0	0		YJ Zhu			CAGGS-2A-mRuby3
		G-R	15	1	0		YJ Zhu
		R-R	5	0	0		YJ Zhu
		G-N	4	1	0		YJ Zhu
		R-N	5	3	0		YJ Zhu
		N-N	0	0	0		YJ Zhu			green
20201008	p11	G-G	6	2	0		YJ Zhu			CAGGS-2A-mNeonGreen
		G-R	20	0	1		YJ Zhu
		R-R	7	0	0		YJ Zhu
		G-N	9	0	0		YJ Zhu
		R-N	7	3	0		YJ Zhu
		N-N	1	1	0		YJ Zhu
20201009	p12	G-G	1	0	0		YJ Zhu
		G-R	7	0	0		YJ Zhu
		R-R	2	0	0		YJ Zhu		Total	connection	Uni-direction	Bi-direction		connection rate	Uni-direction rate	Bi-direction	G=GFP+ cells, R=RFP+ cells, N=no-flourence cells
		G-N	7	1	0		YJ Zhu	G-G	66	6	6	0		0.0909091	0.0909091	0
		R-N	10	1	1		YJ Zhu	G-R	151	19	13	6		0.125828	0.0860927	0.0397351
		N-N	4	0	0		YJ Zhu	R-R	60	10	9	1		0.166667	0.15	0.0166667
20201010	p13	G-G	7	0	0		YJ Zhu	G-N	139	9	9	0		0.0647482	0.0647482	0
		G-R	5	1	0		YJ Zhu	R-N	102	13	11	2		0.127451	0.107843	0.0196078
		R-R	0	0	0		YJ Zhu	N-N	40	6	6	0		0.15	0.15	0
		G-N	16	1	0		YJ Zhu
		R-N	4	0	0		YJ Zhu
		N-N	2	0	0		YJ Zhu	same color	126	16	15	1		0.126984	0.119048	0.00793651
20201015	p12	G-G	1	0	0		YJ Zhu
		G-R	12	1	0		YJ Zhu	C-N	241	22	20	2		0.0912863	0.0829876	0.00829876
		R-R	6	1	0		YJ Zhu
		G-N	5	0	0		YJ Zhu			Notes
		R-N	9	0	0		YJ Zhu			1 or 2 mice were used in each day
		N-N	1	0	0		YJ Zhu			G=GFP+ cells
20201016	p13	G-G	7	1	0		YJ Zhu			R=RFP+ cells
		G-R	8	1	2		YJ Zhu			N=no flourence cells
		R-R	1	1	0		YJ Zhu			C=G+R(GFP+ or RFP+ cells)
		G-N	9	2	0		YJ Zhu			same color= G-G+R-R
		R-N	8	2	0		YJ Zhu
		N-N	3	2	0		YJ Zhu
20201028	p11	G-G	1	0	0		YJ Zhu
		G-R	10	2	0		YJ Zhu
		R-R	11	3	0		YJ Zhu
		G-N	5	1	0		YJ Zhu
		R-N	5	0	0		YJ Zhu
		N-N	1	0	0		YJ Zhu
20201104	p11	G-G	2	0	0		YJ Zhu
		G-R	12	1	1		YJ Zhu
		R-R	5	1	0		YJ Zhu
		G-N	6	0	0		YJ Zhu
		R-N	9	0	0		YJ Zhu
		N-N	1	1	0		YJ Zhu
20201105	p12	G-G	4	1	0		YJ Zhu
		G-R	3	1	0		YJ Zhu
		R-R	0	0	0		YJ Zhu
		G-N	7	0	0		YJ Zhu
		R-N	1	0	0		YJ Zhu
		N-N	1	0	0		YJ Zhu
20201106	p13	G-G	2	1	0		YJ Zhu
		G-R	10	1	0		YJ Zhu
		R-R	7	1	1		YJ Zhu
		G-N	6	0	0		YJ Zhu
		R-N	7	0	0		YJ Zhu
		N-N	4	0	0		YJ Zhu
20201110	p11	G-G	4	0	0		YJ Zhu
		G-R	0	0	0		YJ Zhu
		R-R	0	0	0		YJ Zhu
		G-N	13	0	0		YJ Zhu
		R-N	0	0	0		YJ Zhu
		N-N	4	0	0		YJ Zhu
20201111	p12	G-G	4	0	0		YJ Zhu
		G-R	0	0	0		YJ Zhu
		R-R	0	0	0		YJ Zhu
		G-N	10	0	0		YJ Zhu
		R-N	0	0	0		YJ Zhu
		N-N	4	0	0		YJ Zhu
20201112	p13	G-G	2	0	0		YJ Zhu
		G-R	2	0	0		YJ Zhu
		R-R	0	0	0		YJ Zhu
		G-N	10	0	0		YJ Zhu
		R-N	2	0	0		YJ Zhu
		N-N	4	0	0		YJ Zhu
20210624	p10	G-G	6	0	0		YJ Zhu
		G-R	17	1	1		YJ Zhu
		R-R	8	1	0		YJ Zhu
		G-N	8	2	0		YJ Zhu
		R-N	9	0	0		YJ Zhu
		N-N	0	0	0		YJ Zhu
20210625	p11	G-G	11	1	0		YJ Zhu
		G-R	20	3	1		YJ Zhu
		R-R	5	1	0		YJ Zhu
		G-N	7	1	0		YJ Zhu
		R-N	7	0	0		YJ Zhu
		N-N	0	0	0		YJ Zhu
20210730	p10	G-G	1	0	0		YJ Zhu
		G-R	6	0	0		YJ Zhu
		R-R	2	0	0		YJ Zhu
		G-N	10	0	0		YJ Zhu
		R-N	11	1	1		YJ Zhu
		N-N	6	2	0		YJ Zhu
20210801	p11	G-G	1	0	0		YJ Zhu
		G-R	4	0	0		YJ Zhu
		R-R	1	0	0		YJ Zhu
		G-N	7	0	0		YJ Zhu
		R-N	8	1	0		YJ Zhu
		N-N	4	0	0		YJ Zhu
