# Supplementary material for: Combinatorial expression of γ-protocadherins regulates synaptic connectivity in the mouse neocortex
Source: eLife. 2024 Mar 12;12:RP89532. doi: 10.7554/eLife.89532 (PMC10932546; doi:10.7554/eLife.89532)
Supplement: Figure 2—source data 1. [file elife-89532-fig2-data1.xlsx]

## Sheet: Fig.2B&D
Date	Age	Genotype	Genotype	Total	Uni-direction	Bi-direction	Gap junction	experimenter	notes	Summary
2018.8.16	p11	pcdhg f/f nex+/+	pcdhg KO	17	1	1	0	YJ Zhu		Genotype	age	Total	chemical connection	Uni-direction	Bi-direction	Gap junction	connection rate	Uni-direction rate	Bi-direction	Gap junction rate
2019.4.21	p11	pcdhg f/f nex+/-	pcdhg KO	32	7	0	0	YJ Zhu		pcdhg KO	all	511	103	93	10	1	0.201566	0.181996	0.0195695	0.00195695
2019.3.19	p12	pcdhg f/f nex+/-	pcdhg KO	27	5	0	0	YJ Zhu		pcdhg control	all	813	122	105	17	4	0.150062	0.129151	0.0209102	0.00492005
2018.4.9	p12	pcdhg f/f nex+/-	pcdhg KO	6	1	0	0	YJ Zhu		pcdha KO	all	337	38	34	4	0	0.11276	0.10089	0.0118694	0
2019.4.2	p14	pcdhg f/f nex+/-	pcdhg KO	22	6	0	0	YJ Zhu		pcdha control	all	182	26	22	4	0	0.142857	0.120879	0.021978	0
2018.8.19	p14	pcdhg f/f nex+/+	pcdhg KO	14	1	1	0	YJ Zhu
2018.4.8	p11	pcdhg f/f nex+/-	pcdhg KO	45	11	3	0	CY Deng
2018.4.9	p12	pcdhg f/f nex+/-	pcdhg KO	33	7	0	0	CY Deng
2018.4.10	p13	pcdhg f/f nex+/-	pcdhg KO	15	3	0	0	CY Deng
2018.12.23	p12	pcdhg f/f nex+/+	pcdhg KO	31	5	0	0	CY Deng
2019.04.02	p14	pcdhg f/f nex+/-	pcdhg KO	31	6	1	0	CY Deng
2019.04.21	p11	pcdhg f/f nex+/-	pcdhg KO	27	2	1	0	CY Deng
2019.3.10	p17	pcdhg f/f nex+/-	pcdhg KO	27	9	0	0	CY Deng
2018.8.3	p17	pcdhg f/f nex+/-	pcdhg KO	9	2	0	0	YJ Zhu
2019.2.11	p17	pcdhg f/f nex+/+	pcdhg KO	27	4	1	0	YJ Zhu
2019.3.10	p17	pcdhg f/f nex+/+	pcdhg KO	24	3	1	0	YJ Zhu
2019.2.12	p18	pcdhg f/f nex+/+	pcdhg KO	21	4	0	1	YJ Zhu
2018.8.25	p20	pcdhg f/f nex+/+	pcdhg KO	34	9	0	0	YJ Zhu
2019.4.14	p26	pcdhg f/f nex+/-	pcdhg KO	18	0	0	0	YJ Zhu
2019.4.9	p29	pcdhg f/f nex+/-	pcdhg KO	13	4	0	0	YJ Zhu
2019.04.09	p29	pcdhg f/f nex+/-	pcdhg KO	22	1	1	0	CY Deng
2019.04.14	p26	pcdhg f/f nex+/-	pcdhg KO	16	2	0	0	CY Deng
2019.4.29	p9	pcdhg +/+ nex+/+	pcdhg control	27	2	0	0	YJ Zhu
2019.4.30	p10	pcdhg +/+ nex+/+	pcdhg control	6	2	0	0	YJ Zhu
2019.3.18	p11	pcdhg +/+ nex+/+	pcdhg control	27	5	0	0	YJ Zhu
2019.4.23	p11	pcdhg +/+ nex+/+	pcdhg control	30	5	0	0	YJ Zhu
2018.7.2	p12	pcdhg +/+ nex-/-	pcdhg control	31	5	0	0	YJ Zhu
2018.5.20	p13	pcdhg +/+ nex+/-	pcdhg control	14	2	0	0	YJ Zhu
2019.4.1	p13	pcdhg +/+ nex+/+	pcdhg control	15	5	1	2	YJ Zhu
2018.8.18	p13	pcdhg +/+ nex+/-	pcdhg control	14	2	0	0	YJ Zhu
2018.5.21	p14	pcdhg +/+ nex+/-	pcdhg control	16	1	0	0	YJ Zhu
2018.5.27	p14	pcdhg +/+ nex+/-	pcdhg control	24	7	0	0	YJ Zhu
2018.5.28	p15	pcdhg +/+ nex+/+	pcdhg control	27	4	0	0	YJ Zhu
2019.2.16	p17	pcdhg +/+ nex+/-	pcdhg control	20	4	0	0	YJ Zhu
2018.8.6	p17	pcdhg +/+ nex+/-	pcdhg control	16	4	2	0	YJ Zhu
2018.8.9	p20	pcdhg +/+ nex+/-	pcdhg control	1	0	0	0	YJ Zhu
2018.8.8	p22	pcdhg +/+ nex+/-	pcdhg control	10	1	0	0	YJ Zhu
2019.4.16	p28	pcdhg +/+ nex+/-	pcdhg control	16	0	1	0	YJ Zhu
2019.4.27	p28	pcdhg +/+ nex+/+	pcdhg control	22	1	1	0	YJ Zhu
2019.3.30	p28	pcdhg +/+ nex+/+	pcdhg control	21	1	0	0	YJ Zhu
2019.3.31	p29	pcdhg +/+ nex+/+	pcdhg control	6	0	0	0	YJ Zhu
2019.4.6	p30	pcdhg +/+ nex+/+	pcdhg control	20	3	0	0	YJ Zhu
2018.5.20	p13	pcdhg +/+ nex+/-	pcdhg control	10	2	1	0	CY Deng
2018.5.21	p11	pcdhg +/+ nex+/-	pcdhg control	15	1	0	0	CY Deng
2018.5.22	p12	pcdhg +/+ nex+/-	pcdhg control	45	4	0	1	CY Deng
2018.5.27	p14	pcdhg +/+ nex+/-	pcdhg control	20	4	1	0	CY Deng
2018.12.22	p11	pcdhg +/+ nex+/-	pcdhg control	23	2	0	0	CY Deng
2019.04.01	p13	pcdhg +/+ nex+/+	pcdhg control	27	5	1	1	CY Deng
2019.04.15	p12	pcdhg +/+ nex+/+	pcdhg control	30	7	0	0	CY Deng
2019.04.22	p10	pcdhg +/+ nex+/+	pcdhg control	31	4	0	0	CY Deng
2019.04.23	p11	pcdhg +/+ nex+/+	pcdhg control	31	3	1	0	CY Deng
2019.04.29	p9	pcdhg +/+ nex+/+	pcdhg control	40	3	0	0	CY Deng
2019.4.30	p10	pcdhg +/+ nex+/+	pcdhg control	37	4	2	0	CY Deng
2018.5.28	p15	pcdhg +/+ nex+/+	pcdhg control	27	2	1	0	CY Deng
2019.2.11	p17	pcdhg +/+ nex+/-	pcdhg control	22	7	1	0	CY Deng
2019.2.16	p17	pcdhg +/+ nex+/-	pcdhg control	27	3	2	0	CY Deng
2019.3.30	p28	pcdhg +/+ nex+/+	pcdhg control	15	0	1	0	CY Deng
2019.3.31	p29	pcdhg +/+ nex+/+	pcdhg control	17	0	1	0	CY Deng
2019.04.27	p28	pcdhg +/+ nex+/+	pcdhg control	11	0	0	0	CY Deng
2019.04.28	p29	pcdhg +/+ nex+/+	pcdhg control	7	0	0	0	CY Deng
2019.04.06	p30	pcdhg +/+ nex+/+	pcdhg control	15	0	0	0	CY Deng
2019.6.9	p14	pcdhaf/f nex+/-	pcdha KO	42	5	0	0	YJ Zhu
2019.6.23	p10	pcdhaf/f nex+/-	pcdha KO	13	1	0	0	YJ Zhu
2019.6.25	p12	pcdhaf/f nex+/+	pcdha KO	14	3	0	0	YJ Zhu
2019.7.13	p12	pcdhaf/f nex+/-	pcdha KO	41	5	2	0	YJ Zhu
2019.8.24	p11	pcdhaf/f nex+/+	pcdha KO	49	4	1	0	YJ Zhu
2019.9.1	p13	pcdhaf/f nex+/-	pcdha KO	47	7	0	0	YJ Zhu
2019.06.09	p14	pcdhaf/f nex+/+	pcdha KO	25	3	0	0	CY Deng
2019.06.11	p10	pcdhaf/f nex+/-	pcdha KO	15	0	0	0	CY Deng
2019.06.23	p10	pcdhaf/f nex+/-	pcdha KO	10	1	0	0	CY Deng
2019.06.25	p12	pcdhaf/f nex+/+	pcdha KO	24	2	1	0	CY Deng
2019.07.13	p12	pcdhaf/f nex+/-	pcdha KO	30	2	0	0	CY Deng
2019.08.24	p11	pcdhaf/f nex+/-	pcdha KO	27	1	0	0	CY Deng
2019.8.27	p14	pcdha+/+ nex+/+	pcdha control	17	2	0	0	YJ Zhu
2019.9.20	p13	pcdha+/+ nex+/+	pcdha control	59	10	2	0	YJ Zhu
2019.9.27	p12	pcdha+/+ nex+/-	pcdha control	43	5	2	0	YJ Zhu
2019.9.28	p13	pcdha+/+ nex+/+	pcdha control	38	2	0	0	YJ Zhu
2019.08.27	p11	pcdha+/+ nex+/-	pcdha control	25	3	0	0	CY Deng

## Sheet: Fig.2CEF
Date	Age	Genotype	Genotype	pair number	pair		distance(pixel)	distance(um)(/6.16)	Uni-direction	Bi-direction	Gap junction	experimenter
2019.2.26	p10	pcdhg+/+ nex+/+	control	1	1-2	L2/3	428	193.411	1	0	0	YJ Zhu		Summary for Fig.2C-left
	p10				1-3	L2/3	296	48.0519	0	0	0	YJ Zhu			pair num	chemical connection	Uni-direction	Bi-direction	Gap junction	chemical connection rate
	p10				1-4	L2/3	870	141.234	0	0	0	YJ Zhu		pcdhg control	651	73	61	12	0	0.444949	399.347
	p10				2-3	L2/3	737	119.643	0	0	0	YJ Zhu		pcdhg KO	515	94	79	15	0	0.628957	397.679
	p10				2-4	L2/3	448	72.7273	0	0	0	YJ Zhu
	p10				3-4	L2/3	1189	193.019	0	0	0	YJ Zhu		Notes: distance more than 200um were not calculated
	p10			2	2-3	L2/3	711	115.422	0	0	0	YJ Zhu
	p10				2-4	L2/3	564	91.5584	0	0	0	YJ Zhu
	p10				3-4	L2/3	1252	203.247	0	0	0	YJ Zhu		Summary for Fig.2E
	p10			3	1-4	L2/3	1078	175	0	0	0	YJ Zhu		pcdhg control	distance(um)	control num	chemical connection	Uni-direction	Bi-direction	Gap junction	chemical connection rate	average distance
	p10			4	2-3	L2/3	739	119.968	0	0	0	YJ Zhu			0-50	165	35	29	6	0	0.212121	32.489
	p10				2-4	L2/3	313	50.8117	0	0	0	YJ Zhu			50-100	208	20	17	3	0	0.0961538	73.468
	p10				3-4	L2/3	1057	171.591	0	0	0	YJ Zhu			100-150	179	10	7	3	0	0.0558659	122.211
	p10			5	1-4	L2/3	920	149.351	0	0	0	YJ Zhu			150-200	99	8	8	0	0	0.0808081	171.179
	p10			6	2-4	L2/3	436	70.7792	0	0	0	YJ Zhu		pcdhg KO	distance(um)	KO num	chemical connection	Uni-directional	Bi-directional	Gap junction	chemical connection rate	average distance
2019.3.4	p13	pcdhg+/+ nex+/+	control	1	1-2	L2/3	656	106.494	0	0	0	YJ Zhu			0-50	136	27	18	9	0	0.198529	32.735
	p13				1-3	L2/3	360	58.4416	0	0	0	YJ Zhu			50-100	208	50	46	4	0	0.240385	73.693
	p13				2-3	L2/3	1010	163.961	0	0	0	YJ Zhu			100-150	105	12	11	1	0	0.114286	121.951
	p13			2	1-2	L2/3	444	72.0779	0	0	0	YJ Zhu			150-200	66	5	4	1	0	0.0757576	169.3
	p13				1-4	L2/3	102	16.5584	0	0	0	YJ Zhu
	p13				2-4	L2/3	550	89.2857	0	0	0	YJ Zhu
	p13			3	1-2	L2/3	671	108.929	0	0	0	YJ Zhu		Summary for Fig.2F
	p13				1-3	L2/3	656	106.494	0	1	0	YJ Zhu			control age	control num	chemical connection	Uni-direction	Bi-direction	Gap junction	chemical connection rate	average distance
	p13				1-4	L2/3	1169	189.773	0	0	0	YJ Zhu		pcdhg control	p10-12	230	20	17	3	0	0.0869565	95.38
	p13				2-3	L2/3	74	12.013	0	0	0	YJ Zhu			p13-15	227	29	23	6	0	0.127753	88.13
	p13				2-4	L2/3	507	82.3052	1	0	0	YJ Zhu			p16-p18	146	19	18	1	0	0.130137	88.79
	p13				3-4	L2/3	512	83.1169	0	0	0	YJ Zhu			p19-p20	48	5	3	2	0	0.104167	94.98
	p13			4	1-2	L2/3	562	91.2338	0	0	0	YJ Zhu
	p13				1-3	L2/3	242	39.2857	0	0	0	YJ Zhu		pcdhg KO	KO age	KO num	chemical connection	Uni-directional	Bi-directional	Gap junction	chemical connection rate	average distance
	p13				1-4	L2/3	866	140.584	0	0	0	YJ Zhu			p10-12	199	32	28	4	0	0.160804	82.55
	p13				2-3	L2/3	798	129.545	0	0	0	YJ Zhu			p13-15	102	22	20	2	0	0.215686	85.96
	p13				2-4	L2/3	297	48.2143	0	0	0	YJ Zhu			p16-p18	165	30	26	4	0	0.181818	89.44
	p13				3-4	L2/3	1094	177.597	0	0	0	YJ Zhu			p19-p20	49	10	5	5	0	0.204082	77.67
2019.3.5	p14	pcdhg+/+ nex+/-	control	1	1-4	L2/3	690	112.013	0	0	0	YJ Zhu
	p14			2	1-2	L2/3	160	25.974	0	0	0	YJ Zhu
	p14				1-3	L2/3	220	35.7143	0	0	0	YJ Zhu
	p14				1-4	L2/3	689	111.851	0	0	0	YJ Zhu
	p14				2-3	L2/3	374	60.7143	1	0	0	YJ Zhu
	p14				2-4	L2/3	543	88.1494	0	0	0	YJ Zhu
	p14				3-4	L2/3	911	147.89	0	0	0	YJ Zhu
	p14			3	1-3	L2/3	136	22.0779	0	0	0	YJ Zhu
	p14			4	1-2	L2/3	332	53.8961	0	0	0	YJ Zhu
	p14				1-3	L2/3	338	54.8701	0	0	0	YJ Zhu
	p14				2-3	L2/3	662	107.468	0	0	0	YJ Zhu
	p14			5	1-2	L2/3	365	59.2532	0	0	0	YJ Zhu
	p14				1-3	L2/3	535	86.8506	0	0	0	YJ Zhu
	p14				1-4	L2/3	214	34.7403	0	0	0	YJ Zhu
	p14				2-3	L2/3	914	148.377	0	0	0	YJ Zhu
	p14				2-4	L2/3	148	24.026	0	0	0	YJ Zhu
	p14				3-4	L2/3	770	125	0	0	0	YJ Zhu
	p14			6	1-3	L2/3	314	50.974	0	0	0	YJ Zhu
	p14				1-4	L2/3	698	113.312	0	0	0	YJ Zhu
	p14				3-4	L2/3	396	64.2857	0	0	0	YJ Zhu
2019.3.12	p10	pcdhg+/+ nex+/-	control	1	1-3	L2/3	82	13.3117	0	0	0	YJ Zhu
	p10				1-4	L2/3	1348	218.831	0	0	0	YJ Zhu
	p10				3-4	L2/3	1302	211.364	0	0	0	YJ Zhu
	p10			2	1-2	L2/3	690	112.013	0	0	0	YJ Zhu
	p10				1-3	L2/3	234	37.987	1	0	0	YJ Zhu
	p10				1-4	L2/3	924	150	0	0	0	YJ Zhu
	p10				2-3	L2/3	917	148.864	0	0	0	YJ Zhu
	p10				2-4	L2/3	239	38.7987	0	0	0	YJ Zhu
	p10				3-4	L2/3	1162	188.636	0	0	0	YJ Zhu
	p10			3	1-2	L2/3	354	57.4675	0	0	0	YJ Zhu
	p10				1-3	L2/3	550	89.2857	0	0	0	YJ Zhu
	p10				1-4	L2/3	480	77.9221	0	0	0	YJ Zhu
	p10				2-3	L2/3	904	146.753	0	0	0	YJ Zhu
	p10				2-4	L2/3	124	20.1299	0	0	0	YJ Zhu
	p10				3-4	L2/3	1034	167.857	0	0	0	YJ Zhu
	p10			4	1-2	L2/3	556	90.2597	0	0	0	YJ Zhu
	p10				1-4	L2/3	960	155.844	0	0	0	YJ Zhu
	p10				2-4	L2/3	406	65.9091	1	0	0	YJ Zhu
	p10			5	1-3	L2/3	225	36.526	0	0	0	YJ Zhu
	p10				1-4	L2/3	1149	186.526	0	0	0	YJ Zhu
	p10				3-4	L2/3	940	152.597	0	0	0	YJ Zhu
	p10			6	1-2	L2/3	511	82.9545	0	0	0	YJ Zhu
	p10				1-3	L2/3	262	42.5325	0	0	0	YJ Zhu
	p10				1-4	L2/3	1016	164.935	0	0	0	YJ Zhu
	p10				2-3	L2/3	250	40.5844	0	0	0	YJ Zhu
	p10				2-4	L2/3	520	84.4156	0	0	0	YJ Zhu
	p10				3-4	L2/3	765	124.188	0	0	0	YJ Zhu
2019.4.30	p10	pcdhg+/+ nex+/+	control	1	1-2	L2/3	588	95.4545	0	0	0	YJ Zhu
	p10				1-3	L2/3	460	74.6753	0	0	0	YJ Zhu
	p10				1-4	L2/3	968	157.143	0	0	0	YJ Zhu
	p10				2-3	L2/3	142	23.0519	1	0	0	YJ Zhu
	p10				2-4	L2/3	377	61.2013	0	0	0	YJ Zhu
	p10				3-4	L2/3	512	83.1169	0	0	0	YJ Zhu
	p10			2	1-2	L2/3	935	151.786	1	0	0	YJ Zhu
	p10				1-3	L2/3	594	96.4286	0	0	0	YJ Zhu
	p10				1-4	L2/3	1256	203.896	0	0	0	YJ Zhu
	p10				2-3	L2/3	340	55.1948	0	0	0	YJ Zhu
	p10				2-4	L2/3	326	52.9221	0	0	0	YJ Zhu
	p10				3-4	L2/3	665	107.955	0	0	0	YJ Zhu
	p10			3	1-3	L2/3	427	69.3182	0	0	0	YJ Zhu
	p10				1-4	L2/3	1049	170.292	0	0	0	YJ Zhu
	p10				3-4	L2/3	623	101.136	0	0	0	YJ Zhu
	p10			4	1-2	L2/3	692	112.338	0	0	0	YJ Zhu
	p10				1-3	L2/3	336	54.5455	0	0	0	YJ Zhu
	p10				2-3	L2/3	364	59.0909	0	0	0	YJ Zhu
	p10			5	1-2	L2/3	928	150.649	0	0	0	YJ Zhu
	p10				1-3	L2/3	422	68.5065	0	0	0	YJ Zhu
	p10				1-4	L2/3	1272	206.494	0	0	0	YJ Zhu
	p10				2-3	L2/3	518	84.0909	0	0	0	YJ Zhu
	p10				2-4	L2/3	336	54.5455	0	0	0	YJ Zhu
	p10				3-4	L2/3	846	137.338	0	0	0	YJ Zhu
2019.5.5	p14	pcdhg+/+ nex+/+	control	1	1-2	L2/3	437	70.9416	0	0	0	YJ Zhu
	p14				1-3	L2/3	128	20.7792	1	0	0	YJ Zhu
	p14				1-4	L2/3	224	36.3636	0	0	0	YJ Zhu
	p14				2-3	L2/3	551	89.4481	0	0	0	YJ Zhu
	p14				2-4	L2/3	234	37.987	0	1	0	YJ Zhu
	p14				3-4	L2/3	340	55.1948	1	0	0	YJ Zhu
	p14			2	1-2	L2/3	1006	163.312	0	0	0	YJ Zhu
	p14				1-3	L2/3	504	81.8182	0	0	0	YJ Zhu
	p14				1-4	L2/3	658	106.818	0	0	0	YJ Zhu
	p14				2-3	L2/3	498	80.8442	0	0	0	YJ Zhu
	p14				2-4	L2/3	348	56.4935	1	0	0	YJ Zhu
	p14				3-4	L2/3	169	27.4351	0	0	0	YJ Zhu
	p14			3	2-3	L2/3	348	56.4935	0	0	0	YJ Zhu
	p14				2-4	L2/3	300	48.7013	0	0	0	YJ Zhu
	p14				3-4	L2/3	645	104.708	0	0	0	YJ Zhu
	p14			4	1-2	L2/3	766	124.351	0	0	0	YJ Zhu
	p14				1-3	L2/3	193	31.3312	0	0	0	YJ Zhu
	p14				2-3	L2/3	590	95.7792	0	0	0	YJ Zhu
	p14			5	1-3	L2/3	214	34.7403	0	0	0	YJ Zhu
	p14			6	1-2	L2/3	784	127.273	0	0	0	YJ Zhu
	p14				1-3	L2/3	542	87.987	0	0	0	YJ Zhu
	p14				1-4	L2/3	1186	192.532	0	0	0	YJ Zhu
	p14				2-3	L2/3	248	40.2597	1	0	0	YJ Zhu
	p14				2-4	L2/3	420	68.1818	0	0	0	YJ Zhu
	p14				3-4	L2/3	668	108.442	0	0	0	YJ Zhu
2019.5.6	p12	pcdhg+/+ nex+/+	control	1	1-4	L2/3	890	144.481	0	0	0	YJ Zhu
	p12			3	1-2	L2/3	738	119.805	0	0	0	YJ Zhu
	p12				1-3	L2/3	267	43.3442	0	0	0	YJ Zhu
	p12				1-4	L2/3	1124	182.468	0	0	0	YJ Zhu
	p12				2-3	L2/3	474	76.9481	0	0	0	YJ Zhu
	p12				2-4	L2/3	389	63.1494	0	0	0	YJ Zhu
	p12				3-4	L2/3	859	139.448	0	0	0	YJ Zhu
2019.5.11	p15	pcdhg+/+ nex+/+	control	1	1-2	L2/3	661	107.305	0	0	0	YJ Zhu
	p15				1-3	L2/3	291	47.2403	0	0	0	YJ Zhu
	p15				1-4	L2/3	872	141.558	0	0	0	YJ Zhu
	p15				2-3	L2/3	376	61.039	0	0	0	YJ Zhu
	p15				2-4	L2/3	214	34.7403	0	0	0	YJ Zhu
	p15				3-4	L2/3	586	95.1299	0	0	0	YJ Zhu
	p15			2	1-2	L2/3	873	141.721	0	0	0	YJ Zhu
	p15				1-3	L2/3	243	39.4481	0	0	0	YJ Zhu
	p15				1-4	L2/3	1061	172.24	0	0	0	YJ Zhu
	p15				2-3	L2/3	637	103.409	0	0	0	YJ Zhu
	p15				2-4	L2/3	191	31.0065	0	0	0	YJ Zhu
	p15				3-4	L2/3	829	134.578	1	0	0	YJ Zhu
	p15			3	1-2	L2/3	625	101.461	0	0	0	YJ Zhu
	p15				1-3	L2/3	545	88.474	0	0	0	YJ Zhu
	p15				1-4	L2/3	450	73.0519	0	0	0	YJ Zhu
	p15				2-3	L2/3	1169	189.773	0	0	0	YJ Zhu
	p15				2-4	L2/3	171	27.7597	1	0	0	YJ Zhu
	p15				3-4	L2/3	998	162.013	0	0	0	YJ Zhu
	p15			4	1-2	L2/3	597	96.9156	0	0	0	YJ Zhu
	p15				1-3	L2/3	445	72.2403	0	0	0	YJ Zhu
	p15				1-4	L2/3	188	30.5195	0	0	0	YJ Zhu
	p15				2-3	L2/3	1039	168.669	0	0	0	YJ Zhu
	p15				2-4	L2/3	430	69.8052	0	0	0	YJ Zhu
	p15				3-4	L2/3	634	102.922	0	0	0	YJ Zhu
	p15			6	1-2	L2/3	880	142.857	0	0	0	YJ Zhu
	p15				1-3	L2/3	485	78.7338	0	0	0	YJ Zhu
	p15				1-4	L2/3	1120	181.818	0	0	0	YJ Zhu
	p15				2-3	L2/3	404	65.5844	0	0	0	YJ Zhu
	p15				2-4	L2/3	238	38.6364	0	0	0	YJ Zhu
	p15				3-4	L2/3	636	103.247	0	0	0	YJ Zhu
	p15			7	1-2	L2/3	593	96.2662	0	0	0	YJ Zhu
	p15				1-3	L2/3	335	54.3831	1	0	0	YJ Zhu
	p15				1-4	L2/3	766	124.351	0	0	0	YJ Zhu
	p15				2-3	L2/3	930	150.974	0	0	0	YJ Zhu
	p15				2-4	L2/3	184	29.8701	0	0	0	YJ Zhu
	p15				3-4	L2/3	1106	179.545	0	0	0	YJ Zhu
2019.5.13	p11	pcdhg+/+ nex+/+	control	1	1-2	L2/3	154	25	1	0	0	YJ Zhu
	p11				1-3	L2/3	536	87.013	0	0	0	YJ Zhu
	p11				1-4	L2/3	576	93.5065	0	0	0	YJ Zhu
	p11				2-3	L2/3	700	113.636	0	0	0	YJ Zhu
	p11				2-4	L2/3	425	68.9935	0	0	0	YJ Zhu
	p11				3-4	L2/3	1118	181.494	0	0	0	YJ Zhu
	p11			2	1-2	L2/3	289	46.9156	0	0	0	YJ Zhu
	p11				1-4	L2/3	704	114.286	0	0	0	YJ Zhu
	p11				2-4	L2/3	416	67.5325	0	0	0	YJ Zhu
	p11			3	1-2	L2/3	335	54.3831	0	0	0	YJ Zhu
	p11				1-3	L2/3	356	57.7922	0	0	0	YJ Zhu
	p11				1-4	L2/3	805	130.682	0	0	0	YJ Zhu
	p11				2-3	L2/3	700	113.636	0	0	0	YJ Zhu
	p11				2-4	L2/3	482	78.2468	0	0	0	YJ Zhu
	p11				3-4	L2/3	1160	188.312	0	0	0	YJ Zhu
	p11			4	1-3	L2/3	345	56.0065	0	1	0	YJ Zhu
	p11				1-4	L2/3	625	101.461	0	0	0	YJ Zhu
	p11				3-4	L2/3	951	154.383	0	0	0	YJ Zhu
2019.5.18	p16	pcdhg+/+ nex+/+	control	1	2-3	L2/3	315	51.1364	0	0	0	YJ Zhu
	p16				2-4	L2/3	265	43.0195	0	1	0	YJ Zhu
	p16				3-4	L2/3	98	15.9091	0	0	0	YJ Zhu
	p16			2	2-3	L2/3	1121	181.981	1	0	0	YJ Zhu
	p16				2-4	L2/3	626	101.623	0	0	0	YJ Zhu
	p16				2-5	L2/3	845	137.175	0	0	0	YJ Zhu
	p16				3-4	L2/3	511	82.9545	0	0	0	YJ Zhu
	p16				3-5	L2/3	276	44.8052	0	0	0	YJ Zhu
	p16				4-5	L2/3	239	38.7987	0	0	0	YJ Zhu
2019.5.19	p17	pcdhg+/+ nex+/+	control	1	1-4	L2/3	916	148.701	0	0	0	YJ Zhu
	p17				1-5	L2/3	768	124.675	0	0	0	YJ Zhu
	p17				1-6	L2/3	257	41.7208	0	0	0	YJ Zhu
	p17				4-5	L2/3	198	32.1429	0	0	0	YJ Zhu
	p17				4-6	L2/3	673	109.253	0	0	0	YJ Zhu
	p17				5-6	L2/3	514	83.4416	1	0	0	YJ Zhu
2019.6.2	p20	pcdhg+/+ nex+/+	control	1	2-3	L2/3	1074	174.351	1	0	0	YJ Zhu
	p20			2	2-4	L2/3	646	104.87	0	0	0	YJ Zhu
	p20				3-4	L2/3	430	69.8052	0	0	0	YJ Zhu
	p20				2-4	L2/3	415	67.3701	0	0	0	YJ Zhu
	p20				2-5	L2/3	1570	254.87	0	0	0	YJ Zhu
	p20				2-6	L2/3	724	117.532	0	0	0	YJ Zhu
	p20				5-6	L2/3	747	121.266	0	0	0	YJ Zhu
2019.7.20	p15	pcdhg+/+ nex+/+	control	2	2-3	L2/3	902	146.429	0	0	0	YJ Zhu
	p15				2-4	L2/3	546	88.6364	0	0	0	YJ Zhu
	p15				2-6	L2/3	316	51.2987	0	0	0	YJ Zhu
	p15				3-4	L2/3	370	60.0649	0	0	0	YJ Zhu
	p15				3-6	L2/3	602	97.7273	0	1	0	YJ Zhu
	p15				4-6	L2/3	241	39.1234	0	0	0	YJ Zhu
2019.8.8	p13	pcdhg+/+ nex+/+	control	2	1-2	L2/3	1415	229.708	0	0	0	YJ Zhu
	p13				1-3	L2/3	263	42.6948	0	0	0	YJ Zhu
	p13				1-4	L2/3	1178	191.234	0	0	0	YJ Zhu
	p13				1-5	L2/3	634	102.922	0	0	0	YJ Zhu
	p13				1-6	L2/3	910	147.727	0	0	0	YJ Zhu
	p13				2-3	L2/3	1157	187.825	0	0	0	YJ Zhu
	p13				2-4	L2/3	242	39.2857	0	0	0	YJ Zhu
	p13				2-5	L2/3	770	125	0	0	0	YJ Zhu
	p13				2-6	L2/3	499	81.0065	0	0	0	YJ Zhu
	p13				3-4	L2/3	928	150.649	1	0	0	YJ Zhu
	p13				3-5	L2/3	394	63.961	0	0	0	YJ Zhu
	p13				3-6	L2/3	675	109.578	0	0	0	YJ Zhu
	p13				4-5	L2/3	542	87.987	0	0	0	YJ Zhu
	p13				4-6	L2/3	268	43.5065	0	0	0	YJ Zhu
	p13				5-6	L2/3	276	44.8052	0	0	0	YJ Zhu
	p13			3	1-2	L2/3	1632	264.935	0	0	0	YJ Zhu
	p13				1-3	L2/3	279	45.2922	0	1	0	YJ Zhu
	p13				1-4	L2/3	1197	194.318	0	0	0	YJ Zhu
	p13				1-5	L2/3	618	100.325	0	0	0	YJ Zhu
	p13				1-6	L2/3	870	141.234	0	0	0	YJ Zhu
	p13				2-3	L2/3	1354	219.805	0	0	0	YJ Zhu
	p13				2-4	L2/3	439	71.2662	0	0	0	YJ Zhu
	p13				2-5	L2/3	1020	165.584	0	0	0	YJ Zhu
	p13				2-6	L2/3	762	123.701	0	0	0	YJ Zhu
	p13				3-4	L2/3	927	150.487	1	0	0	YJ Zhu
	p13				3-5	L2/3	340	55.1948	0	0	0	YJ Zhu
	p13				3-6	L2/3	597	96.9156	0	0	0	YJ Zhu
	p13				4-5	L2/3	587	95.2922	0	0	0	YJ Zhu
	p13				4-6	L2/3	326	52.9221	0	0	0	YJ Zhu
	p13				5-6	L2/3	258	41.8831	1	0	0	YJ Zhu
2019.8.10	p18	pcdhg+/+ nex+/+	control	1	1-2	L2/3	1626	263.961	0	0	0	YJ Zhu
	p18				1-3	L2/3	603	97.8896	0	0	0	YJ Zhu
	p18				1-4	L2/3	853	138.474	0	0	0	YJ Zhu
	p18				1-5	L2/3	181	29.3831	1	0	0	YJ Zhu
	p18				1-6	L2/3	1182	191.883	0	0	0	YJ Zhu
	p18				2-3	L2/3	1027	166.721	0	0	0	YJ Zhu
	p18				2-4	L2/3	770	125	0	0	0	YJ Zhu
	p18				2-5	L2/3	1447	234.903	0	0	0	YJ Zhu
	p18				2-6	L2/3	440	71.4286	0	0	0	YJ Zhu
	p18				3-4	L2/3	250	40.5844	0	0	0	YJ Zhu
	p18				3-5	L2/3	426	69.1558	0	0	0	YJ Zhu
	p18				3-6	L2/3	577	93.6688	1	0	0	YJ Zhu
	p18				4-5	L2/3	678	110.065	0	0	0	YJ Zhu
	p18				4-6	L2/3	323	52.4351	0	0	0	YJ Zhu
	p18				5-6	L2/3	998	162.013	0	0	0	YJ Zhu
	p18			3	2-3	L2/3	1326	215.26	0	0	0	YJ Zhu
	p18				2-4	L2/3	484	78.5714	0	0	0	YJ Zhu
	p18				2-5	L2/3	798	129.545	0	0	0	YJ Zhu
	p18				2-6	L2/3	223	36.2013	0	0	0	YJ Zhu
	p18				3-4	L2/3	844	137.013	0	0	0	YJ Zhu
	p18				3-5	L2/3	540	87.6623	0	0	0	YJ Zhu
	p18				3-6	L2/3	1112	180.519	0	0	0	YJ Zhu
	p18				4-5	L2/3	306	49.6753	0	0	0	YJ Zhu
	p18				4-6	L2/3	368	59.7403	0	0	0	YJ Zhu
	p18				5-6	L2/3	575	93.3442	0	0	0	YJ Zhu
2019.8.12	p20	pcdhg+/+ nex+/+	control	1	2-3	L2/3	1318	213.961	0	0	0	YJ Zhu
	p20				2-4	L2/3	796	129.221	0	0	0	YJ Zhu
	p20				2-6	L2/3	2664	432.468	0	0	0	YJ Zhu
	p20				3-4	L2/3	527	85.5519	0	1	0	YJ Zhu
	p20				3-6	L2/3	1060	172.078	0	0	0	YJ Zhu
	p20				4-6	L2/3	528	85.7143	0	0	0	YJ Zhu
	p20			2	1-3	L2/3	270	43.8312	0	0	0	YJ Zhu
	p20				1-4	L2/3	1400	227.273	0	0	0	YJ Zhu
	p20				1-6	L2/3	1231	199.838	0	0	0	YJ Zhu
	p20				3-4	L2/3	1123	182.305	0	0	0	YJ Zhu
	p20				3-6	L2/3	955	155.032	0	0	0	YJ Zhu
	p20				4-6	L2/3	170	27.5974	0	0	0	YJ Zhu
	p20			3	2-4	L2/3	428	69.4805	0	0	0	YJ Zhu
	p20				2-6	L2/3	664	107.792	0	0	0	YJ Zhu
	p20				4-6	L2/3	240	38.961	0	0	0	YJ Zhu
	p20			4	1-2	L2/3	1556	252.597	0	0	0	YJ Zhu
	p20				1-3	L2/3	794	128.896	0	0	0	YJ Zhu
	p20				2-3	L2/3	780	126.623	0	0	0	YJ Zhu
2019.3.2	p12	pcdhgf/f nex+/-	KO	1	1-3	L2/3	339	55.0325	0	0	0	YJ Zhu
	p12				1-4	L2/3	506	82.1429	1	0	0	YJ Zhu
	p12				3-4	L2/3	848	137.662	0	0	0	YJ Zhu
	p12			2	1-3	L2/3	343	55.6818	0	0	0	YJ Zhu
	p12			3	1-3	L2/3	525	85.2273	0	0	0	YJ Zhu
	p12			4	1-2	L2/3	359	58.2792	1	0	0	YJ Zhu
	p12				1-4	L2/3	658	106.818	0	0	0	YJ Zhu
	p12				2-4	L2/3	315	51.1364	0	0	0	YJ Zhu
	p12			5	1-3	L2/3	630	102.273	0	0	0	YJ Zhu
	p12				1-4	L2/3	417	67.6948	0	0	0	YJ Zhu
	p12				3-4	L2/3	1053	170.942	0	0	0	YJ Zhu
	p12			6	1-2	L2/3	252	40.9091	0	0	0	YJ Zhu
	p12				1-3	L2/3	490	79.5455	0	0	0	YJ Zhu
	p12				1-4	L2/3	527	85.5519	0	0	0	YJ Zhu
	p12				2-3	L2/3	740	120.13	0	0	0	YJ Zhu
	p12				2-4	L2/3	275	44.6429	0	0	0	YJ Zhu
	p12				3-4	L2/3	1009	163.799	0	0	0	YJ Zhu
2019.3.3	p12	pcdhgf/f nex+/+	KO	1	1-2	L2/3	421	68.3442	0	0	0	YJ Zhu
	p12				1-3	L2/3	483	78.4091	1	0	0	YJ Zhu
	p12				1-4	L2/3	663	107.63	0	0	0	YJ Zhu
	p12				2-3	L2/3	909	147.565	0	0	0	YJ Zhu
	p12				2-4	L2/3	244	39.6104	0	0	0	YJ Zhu
	p12				3-4	L2/3	1153	187.175	0	0	0	YJ Zhu
	p12			2	1-2	L2/3	512	83.1169	0	0	0	YJ Zhu
	p12				1-3	L2/3	560	90.9091	1	0	0	YJ Zhu
	p12				1-4	L2/3	561	91.0714	0	0	0	YJ Zhu
	p12				2-3	L2/3	1065	172.89	0	0	0	YJ Zhu
	p12				2-4	L2/3	58	9.41558	0	0	0	YJ Zhu
	p12				3-4	L2/3	1116	181.169	0	0	0	YJ Zhu
	p12			3	1-2	L2/3	565	91.7208	0	0	0	YJ Zhu
	p12				1-3	L2/3	432	70.1299	0	0	0	YJ Zhu
	p12				2-3	L2/3	1008	163.636	0	0	0	YJ Zhu
	p12			4	1-3	L2/3	526	85.3896	0	0	0	YJ Zhu
	p12				1-4	L2/3	567	92.0455	0	0	0	YJ Zhu
	p12				3-4	L2/3	1092	177.273	0	0	0	YJ Zhu
	p12			5	1-3	L2/3	361	58.6039	0	0	0	YJ Zhu
	p12				1-4	L2/3	219	35.5519	0	0	0	YJ Zhu
	p12				3-4	L2/3	585	94.9675	1	0	0	YJ Zhu
	p12			6	1-2	L2/3	394	63.961	0	0	0	YJ Zhu
	p12				1-3	L2/3	559	90.7468	1	0	0	YJ Zhu
	p12				1-4	L2/3	530	86.039	0	0	0	YJ Zhu
	p12				2-3	L2/3	959	155.682	0	0	0	YJ Zhu
	p12				2-4	L2/3	131	21.2662	0	0	0	YJ Zhu
	p12				3-4	L2/3	1082	175.649	0	0	0	YJ Zhu
	p12			7	1-2	L2/3	182	29.5455	0	0	0	YJ Zhu
	p12				1-3	L2/3	450	73.0519	0	1	0	YJ Zhu
	p12				1-4	L2/3	513	83.2792	0	0	0	YJ Zhu
	p12				2-3	L2/3	628	101.948	1	0	0	YJ Zhu
	p12				2-4	L2/3	340	55.1948	0	0	0	YJ Zhu
	p12				3-4	L2/3	971	157.63	0	0	0	YJ Zhu
	p12			8	1-2	L2/3	465	75.487	0	0	0	YJ Zhu
	p12				1-3	L2/3	593	96.2662	0	0	0	YJ Zhu
	p12				1-4	L2/3	144	23.3766	0	0	0	YJ Zhu
	p12				2-3	L2/3	1074	174.351	0	0	0	YJ Zhu
	p12				2-4	L2/3	320	51.9481	0	0	0	YJ Zhu
	p12				3-4	L2/3	728	118.182	0	0	0	YJ Zhu
2019.3.16	p14	pcdhgf/f nex+/-	KO	1	1-2	L2/3	287	46.5909	0	0	0	YJ Zhu
	p14				1-3	L2/3	97	15.7468	1	0	0	YJ Zhu
	p14				1-4	L2/3	375	60.8766	0	0	0	YJ Zhu
	p14			2	1-2	L2/3	982	159.416	0	0	0	YJ Zhu
	p14			3	1-2	L2/3	271	43.9935	0	0	0	YJ Zhu
	p14				1-3	L2/3	212	34.4156	0	0	0	YJ Zhu
	p14				1-4	L2/3	918	149.026	0	0	0	YJ Zhu
	p14				2-3	L2/3	478	77.5974	1	0	0	YJ Zhu
	p14				2-4	L2/3	660	107.143	0	0	0	YJ Zhu
	p14				3-4	L2/3	1130	183.442	0	0	0	YJ Zhu
	p14			4	1-2	L2/3	452	73.3766	0	0	0	YJ Zhu
	p14				1-3	L2/3	284	46.1039	0	0	0	YJ Zhu
	p14				1-4	L2/3	865	140.422	0	0	0	YJ Zhu
	p14				2-3	L2/3	737	119.643	1	0	0	YJ Zhu
	p14				2-4	L2/3	415	67.3701	0	0	0	YJ Zhu
	p14				3-4	L2/3	1148	186.364	0	0	0	YJ Zhu
	p14			5	2-3	L2/3	815	132.305	0	0	0	YJ Zhu
	p14				2-4	L2/3	261	42.3701	0	0	0	YJ Zhu
	p14				3-4	L2/3	546	88.6364	0	0	0	YJ Zhu
	p14			6	1-2	L2/3	544	88.3117	0	0	0	YJ Zhu
	p14				1-3	L2/3	306	49.6753	1	0	0	YJ Zhu
	p14				1-4	L2/3	750	121.753	0	0	0	YJ Zhu
	p14				2-3	L2/3	259	42.0455	0	0	0	YJ Zhu
	p14				2-4	L2/3	200	32.4675	0	0	0	YJ Zhu
	p14				3-4	L2/3	448	72.7273	0	0	0	YJ Zhu
	p14			7	1-2	L2/3	150	24.3506	0	0	0	YJ Zhu
	p14				1-3	L2/3	244	39.6104	0	0	0	YJ Zhu
	p14				1-4	L2/3	427	69.3182	1	0	0	YJ Zhu
	p14				2-3	L2/3	344	55.8442	0	0	0	YJ Zhu
	p14				2-4	L2/3	311	50.487	0	0	0	YJ Zhu
	p14				3-4	L2/3	662	107.468	0	0	0	YJ Zhu
	p14			8	1-2	L2/3	326	52.9221	0	0	0	YJ Zhu
	p14				1-4	L2/3	736	119.481	0	0	0	YJ Zhu
	p14				2-4	L2/3	418	67.8571	0	0	0	YJ Zhu
2019.5.4	p14	pcdhgf/f nex+/-	KO	1	1-2	L2/3	378	61.3636	0	0	0	YJ Zhu
	p14			2	1-2	L2/3	120	19.4805	0	1	0	YJ Zhu
	p14				1-3	L2/3	577	93.6688	0	1	0	YJ Zhu
	p14				1-4	L2/3	450	73.0519	1	0	0	YJ Zhu
	p14				2-3	L2/3	700	113.636	1	0	0	YJ Zhu
	p14				2-4	L2/3	339	55.0325	0	0	0	YJ Zhu
	p14				3-4	L2/3	1025	166.396	0	0	0	YJ Zhu
	p14			3	1-2	L2/3	434	70.4545	0	0	0	YJ Zhu
	p14				1-3	L2/3	340	55.1948	0	0	0	YJ Zhu
	p14				1-4	L2/3	924	150	0	0	0	YJ Zhu
	p14				2-3	L2/3	772	125.325	0	0	0	YJ Zhu
	p14				2-4	L2/3	496	80.5195	1	0	0	YJ Zhu
	p14				3-4	L2/3	1259	204.383	0	0	0	YJ Zhu
	p14			4	1-2	L2/3	595	96.5909	0	0	0	YJ Zhu
	p14				1-4	L2/3	988	160.39	0	0	0	YJ Zhu
	p14				2-4	L2/3	398	64.6104	0	0	0	YJ Zhu
	p14			5	2-3	L2/3	208	33.7662	1	0	0	YJ Zhu
	p14				2-4	L2/3	356	57.7922	0	0	0	YJ Zhu
	p14				3-4	L2/3	560	90.9091	1	0	0	YJ Zhu
	p14			6	1-2	L2/3	482	78.2468	1	0	0	YJ Zhu
	p14				1-4	L2/3	574	93.1818	0	0	0	YJ Zhu
	p14				2-4	L2/3	1047	169.968	1	0	0	YJ Zhu
	p14			7	1-2	L2/3	655	106.331	0	0	0	YJ Zhu
	p14				1-3	L2/3	438	71.1039	0	0	0	YJ Zhu
	p14				2-3	L2/3	235	38.1494	0	0	0	YJ Zhu
2019.5.7	p12	pcdhgf/f nex+/-	KO	1	1-3	L2/3	528	85.7143	0	0	0	YJ Zhu
	p12				1-4	L2/3	1258	204.221	0	0	0	YJ Zhu
	p12				3-4	L2/3	742	120.455	0	0	0	YJ Zhu
	p12			2	1-2	L2/3	269	43.6688	0	0	0	YJ Zhu
	p12				1-3	L2/3	386	62.6623	0	0	0	YJ Zhu
	p12				1-4	L2/3	565	91.7208	0	0	0	YJ Zhu
	p12				2-3	L2/3	650	105.519	0	0	0	YJ Zhu
	p12				2-4	L2/3	296	48.0519	0	0	0	YJ Zhu
	p12				3-4	L2/3	938	152.273	0	0	0	YJ Zhu
	p12			5	1-2	L2/3	942	152.922	0	0	0	YJ Zhu
	p12				1-3	L2/3	544	88.3117	0	0	0	YJ Zhu
	p12				1-4	L2/3	1132	183.766	0	0	0	YJ Zhu
	p12				2-3	L2/3	398	64.6104	0	0	0	YJ Zhu
	p12				2-4	L2/3	192	31.1688	0	0	0	YJ Zhu
	p12				3-4	L2/3	584	94.8052	0	0	0	YJ Zhu
	p12			6	1-2	L2/3	372	60.3896	0	0	0	YJ Zhu
2019.5.12	p16	pcdhgf/f nex+/+	KO	1	1-3	L2/3	719	116.721	0	0	0	YJ Zhu
	p16				1-4	L2/3	958	155.519	0	0	0	YJ Zhu
	p16				3-4	L2/3	238	38.6364	0	0	0	YJ Zhu
	p16			2	1-2	L2/3	840	136.364	0	0	0	YJ Zhu
	p16				1-3	L2/3	524	85.0649	0	0	0	YJ Zhu
	p16				1-4	L2/3	1203	195.292	0	0	0	YJ Zhu
	p16				2-3	L2/3	332	53.8961	0	0	0	YJ Zhu
	p16				2-4	L2/3	358	58.1169	0	0	0	YJ Zhu
	p16				3-4	L2/3	683	110.877	0	0	0	YJ Zhu
	p16			3	1-2	L2/3	238	38.6364	0	0	0	YJ Zhu
	p16				1-3	L2/3	386	62.6623	0	0	0	YJ Zhu
	p16				2-3	L2/3	622	100.974	0	0	0	YJ Zhu
	p16			4	1-2	L2/3	350	56.8182	0	0	0	YJ Zhu
	p16				1-3	L2/3	559	90.7468	0	0	0	YJ Zhu
	p16				2-3	L2/3	909	147.565	0	0	0	YJ Zhu
	p16			5	1-2	L2/3	213	34.5779	0	1	0	YJ Zhu
	p16				1-3	L2/3	474	76.9481	0	0	0	YJ Zhu
	p16				1-4	L2/3	654	106.169	0	0	0	YJ Zhu
	p16				2-3	L2/3	692	112.338	0	0	0	YJ Zhu
	p16				2-4	L2/3	434	70.4545	0	0	0	YJ Zhu
	p16				3-4	L2/3	1128	183.117	0	0	0	YJ Zhu
	p16			6	1-2	L2/3	464	75.3247	1	0	0	YJ Zhu
	p16				1-3	L2/3	358	58.1169	1	0	0	YJ Zhu
	p16				1-4	L2/3	162	26.2987	0	0	0	YJ Zhu
	p16				2-3	L2/3	825	133.929	0	0	0	YJ Zhu
	p16				2-4	L2/3	304	49.3506	0	0	0	YJ Zhu
	p16				3-4	L2/3	523	84.9026	1	0	0	YJ Zhu
2019.5.25	p13	pcdhgf/f nex+/+	KO	1	2-4	L2/3	488	79.2208	0	0	0	YJ Zhu
	p13			2	4-6	L2/3	287	46.5909	0	0	0	YJ Zhu
	p13			3	2-4	L2/3	775	125.812	0	0	0	YJ Zhu
	p13				2-5	L2/3	1169	189.773	0	0	0	YJ Zhu
	p13				2-6	L2/3	336	54.5455	0	0	0	YJ Zhu
	p13				4-5	L2/3	398	64.6104	0	0	0	YJ Zhu
	p13				4-6	L2/3	434	70.4545	1	0	0	YJ Zhu
	p13				5-6	L2/3	841	136.526	0	0	0	YJ Zhu
2019.6.8	p18	pcdhgf/f nex+/-	KO	1	2-6	L2/3	353	57.3052	1	0	0	YJ Zhu
	p18			2	1-4	L2/3	2300	373.377	0	0	0	YJ Zhu
	p18				3-4	L2/3	1886	306.169	0	0	0	YJ Zhu
	p18			3	3-4	L2/3	879	142.695	0	0	0	YJ Zhu
	p18				3-6	L2/3	589	95.6169	1	0	0	YJ Zhu
	p18				4-6	L2/3	290	47.0779	0	0	0	YJ Zhu
2019.7.21	p16	pcdhgf/f nex+/+	KO	1	1-2	L2/3	1479	240.097	0	0	0	YJ Zhu
	p16				1-3	L2/3	679	110.227	0	0	0	YJ Zhu
	p16				1-4	L2/3	884	143.506	0	0	0	YJ Zhu
	p16				1-5	L2/3	323	52.4351	0	0	0	YJ Zhu
	p16				1-6	L2/3	1316	213.636	0	0	0	YJ Zhu
	p16				2-3	L2/3	801	130.032	0	0	0	YJ Zhu
	p16				2-4	L2/3	593	96.2662	0	0	0	YJ Zhu
	p16				2-5	L2/3	1157	187.825	0	0	0	YJ Zhu
	p16				2-6	L2/3	172	27.9221	1	0	0	YJ Zhu
	p16				3-4	L2/3	208	33.7662	0	0	0	YJ Zhu
	p16				3-5	L2/3	354	57.4675	0	0	0	YJ Zhu
	p16				3-6	L2/3	646	104.87	0	0	0	YJ Zhu
	p16				4-5	L2/3	564	91.5584	0	0	0	YJ Zhu
	p16				4-6	L2/3	432	70.1299	0	0	0	YJ Zhu
	p16				5-6	L2/3	994	161.364	0	1	0	YJ Zhu
	p16			4	1-2	L2/3	1260	204.545	0	0	0	YJ Zhu
	p16				1-3	L2/3	300	48.7013	0	0	0	YJ Zhu
	p16				1-4	L2/3	1098	178.247	0	0	0	YJ Zhu
	p16				1-5	L2/3	530	86.039	0	0	0	YJ Zhu
	p16				1-6	L2/3	769	124.838	0	0	0	YJ Zhu
	p16				2-3	L2/3	964	156.494	0	0	0	YJ Zhu
	p16				2-4	L2/3	172	27.9221	0	0	0	YJ Zhu
	p16				2-5	L2/3	730	118.506	0	0	0	YJ Zhu
	p16				2-6	L2/3	492	79.8701	0	0	0	YJ Zhu
	p16				3-4	L2/3	806	130.844	1	0	0	YJ Zhu
	p16				3-5	L2/3	237	38.474	0	0	0	YJ Zhu
	p16				3-6	L2/3	470	76.2987	0	0	0	YJ Zhu
	p16				4-5	L2/3	568	92.2078	0	0	0	YJ Zhu
	p16				4-6	L2/3	334	54.2208	0	0	0	YJ Zhu
	p16				5-6	L2/3	251	40.7468	0	1	0	YJ Zhu
2019.7.30	p18	pcdhgf/f nex+/+	KO	1	3-4	L2/3	343	55.6818	0	0	0	YJ Zhu
	p18				3-5	L2/3	200	32.4675	0	0	0	YJ Zhu
	p18				4-5	L2/3	541	87.8247	1	0	0	YJ Zhu
	p18			2	1-5	L2/3	608	98.7013	0	0	0	YJ Zhu
	p18				1-6	L2/3	940	152.597	0	0	0	YJ Zhu
	p18				5-6	L2/3	303	49.1883	0	0	0	YJ Zhu
Date	Age	Genotype	Genotype	pair number	pair	Layer	distance(pixel)	distance(um)	Uni-direction	Bi-direction	Gap junction
2019.2.26	p12	pcdhgf/f nex+/-	ko	1	1-3	L2/3	82	13.3117	1	0	0	CY Deng
					1-4	L2/3	606	98.3766	0	0	0	CY Deng
					3-4	L2/3	681	110.552	0	0	0	CY Deng
				2	1-2	L2/3	585	94.9675	0	0	0	CY Deng
					1-3	L2/3	589	95.6169	1	0	0	CY Deng
					1-4	L2/3	682	110.714	0	0	0	CY Deng
					2-3	L2/3	93	15.0974	0	0	0	CY Deng
					2-4	L2/3	119	19.3182	1	0	0	CY Deng
					3-4	L2/3	114	18.5065	1	0	0	CY Deng
				3	1-2	L2/3	118	19.1558	0	0	0	CY Deng
					1-3	L2/3	113	18.3442	1	0	0	CY Deng
					1-4	L2/3	592	96.1039	1	0	0	CY Deng
					2-3	L2/3	123	19.9675	0	0	0	CY Deng
					2-4	L2/3	518	84.0909	1	0	0	CY Deng
					3-4	L2/3	647	105.032	0	0	0	CY Deng
				4	1-2	L2/3	122	19.8052	0	0	0	CY Deng
				5	1-2	L2/3	76	12.3377	0	0	0	CY Deng
					1-3	L2/3	752	122.078	0	0	0	CY Deng
					1-4	L2/3	182	29.5455	0	0	0	CY Deng
					2-3	L2/3	820	133.117	0	0	0	CY Deng
					2-4	L2/3	130	21.1039	0	0	0	CY Deng
					3-4	L2/3	920	149.351	0	0	0	CY Deng
				6	1-2	L2/3	128	20.7792	0	0	0	CY Deng
					1-3	L2/3	75	12.1753	0	0	0	CY Deng
					1-4	L2/3	693	112.5	0	0	0	CY Deng
					2-3	L2/3	78	12.6623	0	0	0	CY Deng
					2-4	L2/3	562	91.2338	0	0	0	CY Deng
					3-4	L2/3	622	100.974	0	0	0	CY Deng
2019.3.3	p12	pcdhgf/f nex+/+	ko	1	1-2	L2/3	760	123.377	0	0	0	CY Deng
					1-3	L2/3	222	36.039	0	0	0	CY Deng
					1-4	L2/3	816	132.468	0	0	0	CY Deng
					2-3	L2/3	547	88.7987	0	0	0	CY Deng
					2-4	L2/3	92	14.9351	0	0	0	CY Deng
					3-4	L2/3	600	97.4026	0	0	0	CY Deng
				2	1-2	L2/3	129	20.9416	0	0	0	CY Deng
					1-3	L2/3	895	145.292	0	0	0	CY Deng
					1-4	L2/3	117	18.9935	0	0	0	CY Deng
					2-3	L2/3	976	158.442	0	0	0	CY Deng
					2-4	L2/3	119	19.3182	0	0	0	CY Deng
					3-4	L2/3	1013	164.448	0	0	0	CY Deng
				3	1-2	L2/3	120	19.4805	1	0	0	CY Deng
					1-3	L2/3	838	136.039	0	0	0	CY Deng
					1-4	L2/3	225	36.526	0	0	0	CY Deng
					2-3	L2/3	949	154.058	0	0	0	CY Deng
					2-4	L2/3	117	18.9935	0	0	0	CY Deng
					3-4	L2/3	1058	171.753	0	0	0	CY Deng
				4	1-2	L2/3	933	151.461	0	0	0	CY Deng
					1-3	L2/3	155	25.1623	0	0	0	CY Deng
					1-4	L2/3	1024	166.234	0	0	0	CY Deng
					2-3	L2/3	1074	174.351	1	0	0	CY Deng
					2-4	L2/3	98	15.9091	0	0	0	CY Deng
					3-4	L2/3	1168	189.61	0	0	0	CY Deng
				5	1-4	L2/3	845	137.175	0	0	0	CY Deng
2019.3.16	p14	pcdhgf/f nex+/-	ko	1	1-3	L2/3	660	107.143	0	0	0	CY Deng
					1-4	L2/3	734	119.156	0	0	0	CY Deng
					3-4	L2/3	1378	223.701	0	0	0	CY Deng
				2	1-2	L2/3	934	151.623	0	0	0	CY Deng
					1-3	L2/3	86	13.961	0	0	0	CY Deng
					2-3	L2/3	1024	166.234	0	0	0	CY Deng
				3	1-2	L2/3	261	42.3701	0	0	0	CY Deng
					1-3	L2/3	328	53.2468	1	0	0	CY Deng
					1-4	L2/3	693	112.5	0	0	0	CY Deng
					2-3	L2/3	585	94.9675	0	0	0	CY Deng
					2-4	L2/3	436	70.7792	0	0	0	CY Deng
					3-4	L2/3	1020	165.584	0	0	0	CY Deng
				4	3-4	L2/3	937	152.11	0	0	0	CY Deng
				5	1-3	L2/3	1084	175.974	0	0	0	CY Deng
					1-4	L2/3	220	35.7143	0	0	0	CY Deng
					3-4	L2/3	1309	212.5	0	0	0	CY Deng
				6	1-3	L2/3	617	100.162	0	0	0	CY Deng
					1-4	L2/3	373	60.5519	0	0	0	CY Deng
					3-4	L2/3	974	158.117	1	0	0	CY Deng
2019.3.19	p12	pcdhgf/f nex+/-	ko	1	2-4	L2/3	354	57.4675	0	0	0	CY Deng
				3	1-2	L2/3	192	31.1688	0	0	0	CY Deng
					1-3	L2/3	520	84.4156	1	0	0	CY Deng
					1-4	L2/3	542	87.987	0	0	0	CY Deng
					2-3	L2/3	718	116.558	0	0	0	CY Deng
					2-4	L2/3	354	57.4675	0	0	0	CY Deng
					3-4	L2/3	1061	172.24	0	0	0	CY Deng
				4	1-2	L2/3	120	19.4805	0	0	0	CY Deng
					1-3	L2/3	286	46.4286	1	0	0	CY Deng
					1-4	L2/3	537	87.1753	0	0	0	CY Deng
					2-3	L2/3	383	62.1753	0	0	0	CY Deng
					2-4	L2/3	418	67.8571	0	0	0	CY Deng
					3-4	L2/3	796	129.221	0	0	0	CY Deng
				5	1-3	L2/3	840	136.364	0	0	0	CY Deng
					1-4	L2/3	199	32.3052	0	0	0	CY Deng
					3-4	L2/3	1038	168.506	0	0	0	CY Deng
				6	1-2	L2/3	283	45.9416	0	0	0	CY Deng
					1-3	L2/3	184	29.8701	1	0	0	CY Deng
					1-4	L2/3	515	83.6039	0	0	0	CY Deng
					2-3	L2/3	472	76.6234	0	0	0	CY Deng
					2-4	L2/3	194	31.4935	0	0	0	CY Deng
					3-4	L2/3	668	108.442	1	0	0	CY Deng
2019.05.04	p14	pcdhgf/f nex+/+	ko	1	1-2	L2/3	318	51.6234	0	0	0	CY Deng
					1-3	L2/3	327	53.0844	1	0	0	CY Deng
					1-4	L2/3	440	71.4286	1	0	0	CY Deng
					2-3	L2/3	656	106.494	0	0	0	CY Deng
					2-4	L2/3	120	19.4805	0	0	0	CY Deng
					3-4	L2/3	765	124.188	1	0	0	CY Deng
				2	1-2	L2/3	262	42.5325	0	0	0	CY Deng
					1-3	L2/3	230	37.3377	0	0	0	CY Deng
					1-4	L2/3	522	84.7403	1	0	0	CY Deng
					2-3	L2/3	490	79.5455	0	0	0	CY Deng
					2-4	L2/3	266	43.1818	0	0	0	CY Deng
					3-4	L2/3	763	123.864	0	0	0	CY Deng
				3	1-2	L2/3	212	34.4156	0	0	0	CY Deng
				4	1-2	L2/3	196	31.8182	0	0	0	CY Deng
					1-3	L2/3	302	49.026	0	0	0	CY Deng
					1-4	L2/3	562	91.2338	0	0	0	CY Deng
					2-3	L2/3	504	81.8182	1	0	0	CY Deng
					2-4	L2/3	368	59.7403	0	0	0	CY Deng
					3-4	L2/3	865	140.422	0	0	0	CY Deng
2019.05.07	p12	pcdhgf/f nex+/+	ko	1	1-2	L2/3	133	21.5909	0	0	0	CY Deng
					1-3	L2/3	156	25.3247	1	0	0	CY Deng
					2-3	L2/3	292	47.4026	0	0	0	CY Deng
				2	1-2	L2/3	517	83.9286	1	0	0	CY Deng
					1-3	L2/3	318	51.6234	0	0	0	CY Deng
					2-3	L2/3	838	136.039	0	0	0	CY Deng
				3	1-2	L2/3	189	30.6818	0	0	0	CY Deng
					1-3	L2/3	606	98.3766	0	0	0	CY Deng
					2-3	L2/3	767	124.513	0	0	0	CY Deng
				4	1-2	L2/3	415	67.3701	0	0	0	CY Deng
					1-3	L2/3	346	56.1688	0	1	0	CY Deng
					2-3	L2/3	738	119.805	1	0	0	CY Deng
				5	1-2	L2/3	174	28.2468	0	1	0	CY Deng
					1-4	L2/3	708	114.935	0	0	0	CY Deng
					2-4	L2/3	534	86.6883	0	0	0	CY Deng
				6	1-2	L2/3	338	54.8701	0	0	0	CY Deng
					1-3	L2/3	426	69.1558	1	0	0	CY Deng
					1-4	L2/3	502	81.4935	0	0	0	CY Deng
					2-3	L2/3	749	121.591	0	0	0	CY Deng
					2-4	L2/3	168	27.2727	0	0	0	CY Deng
					3-4	L2/3	925	150.162	0	0	0	CY Deng
				7	1-2	L2/3	338	54.8701	0	0	0	CY Deng
					1-3	L2/3	88	14.2857	0	0	0	CY Deng
					1-4	L2/3	808	131.169	0	0	0	CY Deng
					2-3	L2/3	412	66.8831	0	0	0	CY Deng
					2-4	L2/3	494	80.1948	0	0	0	CY Deng
					3-4	L2/3	878	142.532	0	0	0	CY Deng
2019.05.14	p11	pcdhgf/f nex+/+	KO	1	1-2	L2/3	97	15.7468	0	0	0	CY Deng
					1-3	L2/3	238	38.6364	0	0	0	CY Deng
					2-3	L2/3	323	52.4351	0	0	0	CY Deng
				2	1-2	L2/3	169	27.4351	0	0	0	CY Deng
					1-3	L2/3	305	49.513	0	0	0	CY Deng
					1-4	L2/3	531	86.2013	0	0	0	CY Deng
					2-3	L2/3	474	76.9481	1	0	0	CY Deng
					2-4	L2/3	355	57.6299	0	0	0	CY Deng
					3-4	L2/3	832	135.065	0	0	0	CY Deng
				3	1-2	L2/3	210	34.0909	0	0	0	CY Deng
					1-3	L2/3	250	40.5844	0	0	0	CY Deng
					1-4	L2/3	655	106.331	0	0	0	CY Deng
					2-3	L2/3	462	75	1	0	0	CY Deng
					2-4	L2/3	446	72.4026	0	0	0	CY Deng
					3-4	L2/3	908	147.403	1	0	0	CY Deng
				4	1-2	L2/3	162	26.2987	0	0	0	CY Deng
					1-4	L2/3	783	127.11	0	0	0	CY Deng
					3-4	L2/3	623	101.136	0	0	0	CY Deng
				5	1-2	L2/3	204	33.1169	0	0	0	CY Deng
					1-3	L2/3	182	29.5455	0	0	0	CY Deng
					1-4	L2/3	380	61.6883	0	0	0	CY Deng
					2-3	L2/3	378	61.3636	1	0	0	CY Deng
					2-4	L2/3	171	27.7597	0	1	0	CY Deng
					3-4	L2/3	552	89.6104	0	0	0	CY Deng
				6	2-3	L2/3	957	155.357	0	0	0	CY Deng
					2-4	L2/3	316	51.2987	0	0	0	CY Deng
					3-4	L2/3	1279	207.63	0	0	0	CY Deng
2019.05.12	p16	pcdhgf/f nex+/+	ko	1	1-2	L2/3	339	55.0325	0	0	0	CY Deng
					1-4	L2/3	790	128.247	1	0	0	CY Deng
					2-4	L2/3	455	73.8636	0	0	0	CY Deng
				2	1-2	L2/3	433	70.2922	0	0	0	CY Deng
					1-3	L2/3	492	79.8701	0	0	0	CY Deng
					2-3	L2/3	921	149.513	0	0	0	CY Deng
				3	1-2	L2/3	620	100.649	0	0	0	CY Deng
					1-3	L2/3	394	63.961	0	0	0	CY Deng
					2-3	L2/3	1005	163.149	0	0	0	CY Deng
				5	1-2	L2/3	269	43.6688	0	0	0	CY Deng
					1-3	L2/3	553	89.7727	0	0	0	CY Deng
					1-4	L2/3	502	81.4935	0	0	0	CY Deng
					2-3	L2/3	813	131.981	1	0	0	CY Deng
					2-4	L2/3	232	37.6623	0	0	0	CY Deng
					3-4	L2/3	1052	170.779	1	0	0	CY Deng
				6	1-2	L2/3	529	85.8766	1	0	0	CY Deng
					1-3	L2/3	258	41.8831	0	0	0	CY Deng
					1-4	L2/3	863	140.097	0	0	0	CY Deng
					2-3	L2/3	292	47.4026	0	0	0	CY Deng
					2-4	L2/3	322	52.2727	1	0	0	CY Deng
					3-4	L2/3	1117	181.331	0	0	0	CY Deng
				7	1-3	L2/3	622	100.974	0	0	0	CY Deng
					1-4	L2/3	519	84.2532	0	0	0	CY Deng
					3-4	L2/3	1138	184.74	0	0	0	CY Deng
2019.06.04	p17	pcdhgf/f nex+/+	ko	2	1-2	L2/3	258	41.8831	0	0	0	CY Deng
					1-4	L2/3	486	78.8961	0	0	0	CY Deng
					2-4	L2/3	243	39.4481	1	0	0	CY Deng
				3	1-3	L2/3	308	50	1	0	0	CY Deng
					1-4	L2/3	983	159.578	0	0	0	CY Deng
					3-4	L2/3	1296	210.39	0	0	0	CY Deng
				4	2-3	L2/3	773	125.487	0	0	0	CY Deng
					2-4	L2/3	585	94.9675	0	0	0	CY Deng
					3-4	L2/3	1363	221.266	0	0	0	CY Deng
				5	1-3	L2/3	567	92.0455	0	0	0	CY Deng
					1-4	L2/3	594	96.4286	0	0	0	CY Deng
					3-4	L2/3	1161	188.474	0	0	0	CY Deng
2019.06.08	p18	pcdhgf/f nex+/-	ko	1	1-2	L2/3	228	37.013	1	0	0	CY Deng
					1-3	L2/3	297	48.2143	0	0	0	CY Deng
					1-4	L2/3	613	99.513	1	0	0	CY Deng
					2-3	L2/3	526	85.3896	0	0	0	CY Deng
					2-4	L2/3	384	62.3377	0	0	0	CY Deng
					3-4	L2/3	907	147.24	0	0	0	CY Deng
				2	1-2	L2/3	483	78.4091	0	0	0	CY Deng
					1-3	L2/3	139	22.5649	0	0	0	CY Deng
					1-4	L2/3	1029	167.045	0	0	0	CY Deng
					2-3	L2/3	626	101.623	0	0	0	CY Deng
					2-4	L2/3	547	88.7987	1	0	0	CY Deng
					3-4	L2/3	1167	189.448	0	0	0	CY Deng
				3	1-3	L2/3	268	43.5065	0	0	0	CY Deng
2019.07.09	p19	pcdhgf/f nex+/+	ko	1	1-3	L2/3	443	71.9156	1	0	0	CY Deng
					1-4	L2/3	718	116.558	0	0	0	CY Deng
					3-4	L2/3	1149	186.526	0	0	0	CY Deng
				2	1-2	L2/3	180	29.2208	0	0	0	CY Deng
					1-3	L2/3	360	58.4416	0	0	0	CY Deng
					1-4	L2/3	520	84.4156	0	0	0	CY Deng
					2-3	L2/3	535	86.8506	1	0	0	CY Deng
					2-4	L2/3	345	56.0065	0	0	0	CY Deng
					3-4	L2/3	883	143.344	0	0	0	CY Deng
				3	3-4	L2/3	779	126.461	0	0	0	CY Deng
				4	1-2	L2/3	244	39.6104	1	0	0	CY Deng
					1-3	L2/3	293	47.5649	0	1	0	CY Deng
					2-3	L2/3	534	86.6883	0	0	0	CY Deng
				5	1-2	L2/3	296	48.0519	0		0	CY Deng
					1-3	L2/3	253	41.0714	0	0	0	CY Deng
					1-4	L2/3	716	116.234	0	0	0	CY Deng
					2-3	L2/3	546	88.6364	0	0	0	CY Deng
					2-4	L2/3	427	69.3182	0	0	0	CY Deng
					3-4	L2/3	965	156.656	0	0	0	CY Deng
				6	1-3	L2/3	168	27.2727	0	0	0	CY Deng
					1-4	L2/3	965	156.656	0	0	0	CY Deng
					3-4	L2/3	1134	184.091	0	0	0	CY Deng
2019.07.16	p20	pcdhgf/f nex+/+	ko	1	1-3	L2/3	271	43.9935	0	0	0	CY Deng
					1-4	L2/3	625	101.461	0	0	0	CY Deng
					3-4	L2/3	905	146.916	0	0	0	CY Deng
				2	1-2	L2/3	198	32.1429	0	0	0	CY Deng
					1-3	L2/3	145	23.539	0	0	0	CY Deng
					1-4	L2/3	438	71.1039	0	0	0	CY Deng
					2-3	L2/3	334	54.2208	0	0	0	CY Deng
					2-4	L2/3	240	38.961	0	0	0	CY Deng
					3-4	L2/3	586	95.1299	0	0	0	CY Deng
				3	1-2	L2/3	218	35.3896	0	1	0	CY Deng
					1-3	L2/3	261	42.3701	0	0	0	CY Deng
					1-4	L2/3	554	89.9351	0	1	0	CY Deng
					2-3	L2/3	482	78.2468	0	0	0	CY Deng
					2-4	L2/3	336	54.5455	0	0	0	CY Deng
					3-4	L2/3	817	132.63	0	0	0	CY Deng
				4	1-2	L2/3	123	19.9675	1	0	0	CY Deng
					1-3	L2/3	316	51.2987	1	0	0	CY Deng
					1-4	L2/3	434	70.4545	0	0	0	CY Deng
					2-3	L2/3	421	68.3442	0	0	0	CY Deng
					2-4	L2/3	322	52.2727	0	0	0	CY Deng
					3-4	L2/3	742	120.455	0	0	0	CY Deng
				5	1-2	L2/3	299	48.539	0	0	0	CY Deng
					1-3	L2/3	234	37.987	0	1	0	CY Deng
					1-4	L2/3	401	65.0974	0	0	0	CY Deng
					2-3	L2/3	532	86.3636	0	0	0	CY Deng
					2-4	L2/3	116	18.8312	0	1	0	CY Deng
					3-4	L2/3	641	104.058	0	0	0	CY Deng
2019.07.21	p16	pcdhgf/f nex+/+	ko	1	1-3	L2/3	338	54.8701	1	0	0	CY Deng
					2-3	L2/3	754	122.403	0	0	0	CY Deng
					2-4	L2/3	484	78.5714	0	0	0	CY Deng
					3-4	L2/3	1236	200.649	0	0	0	CY Deng
				2	1-2	L2/3	315	51.1364	1	0	0	CY Deng
					1-3	L2/3	328	53.2468	0	0	0	CY Deng
					1-4	L2/3	632	102.597	1	0	0	CY Deng
					2-3	L2/3	646	104.87	0	0	0	CY Deng
					2-4	L2/3	336	54.5455	0	0	0	CY Deng
					3-4	L2/3	966	156.818	0	0	0	CY Deng
				3	1-2	L2/3	323	52.4351	0	0	0	CY Deng
					1-3	L2/3	375	60.8766	1	0	0	CY Deng
					1-4	L2/3	600	97.4026	0	0	0	CY Deng
					2-3	L2/3	688	111.688	0	0	0	CY Deng
					2-4	L2/3	297	48.2143	0	0	0	CY Deng
					3-4	L2/3	966	156.818	0	0	0	CY Deng
				4	1-2	L2/3	191	31.0065	1	0	0	CY Deng
					1-3	L2/3	298	48.3766	0	0	0	CY Deng
					1-4	L2/3	463	75.1623	0	0	0	CY Deng
					2-3	L2/3	494	80.1948	0	0	0	CY Deng
					2-4	L2/3	263	42.6948	0	0	0	CY Deng
					3-4	L2/3	758	123.052	0	0	0	CY Deng
				5	1-2	L2/3	248	40.2597	0	0	0	CY Deng
					1-3	L2/3	168	27.2727	0	0	0	CY Deng
					1-4	L2/3	522	84.7403	0	0	0	CY Deng
					2-3	L2/3	415	67.3701	0	0	0	CY Deng
					2-4	L2/3	283	45.9416	0	0	0	CY Deng
					3-4	L2/3	678	110.065	0	0	0	CY Deng
2019.07.23	p18	pcdhgf/f nex+/+	ko	1	1-3	L2/3	329	53.4091	1	0	0	CY Deng
					1-4	L2/3	708	114.935	0	0	0	CY Deng
					3-4	L2/3	1033	167.695	0	0	0	CY Deng
				2	1-2	L2/3	365	59.2532	0	0	0	CY Deng
					1-3	L2/3	132	21.4286	0	0	0	CY Deng
					1-4	L2/3	358	58.1169	0	0	0	CY Deng
					2-3	L2/3	495	80.3571	1	0	0	CY Deng
					2-4	L2/3	692	112.338	0	0	0	CY Deng
					3-4	L2/3	1176	190.909	0	0	0	CY Deng
				3	3-4	L2/3	505	81.9805	0	0	0	CY Deng
				4	2-3	L2/3	812	131.818	0	0	0	CY Deng
					2-4	L2/3	375	60.8766	0	0	0	CY Deng
					3-4	L2/3	1207	195.942	0	0	0	CY Deng
				5	1-2	L2/3	464	75.3247	0	0	0	CY Deng
					1-3	L2/3	349	56.6558	0	0	0	CY Deng
					2-3	L2/3	808	131.169	0	0	0	CY Deng
				6	1-2	L2/3	324	52.5974	0	0	0	CY Deng
					1-3	L2/3	688	111.688	0	1	0	CY Deng
					1-4	L2/3	565	91.7208	0	0	0	CY Deng
					2-3	L2/3	1020	165.584	0	0	0	CY Deng
					2-4	L2/3	237	38.474	0	0	0	CY Deng
					3-4	L2/3	1247	202.435	0	0	0	CY Deng
				7	1-2	L2/3	297	48.2143	0	0	0	CY Deng
					1-3	L2/3	163	26.461	0	0	0	CY Deng
					1-4	L2/3	406	65.9091	0	0	0	CY Deng
					2-3	L2/3	465	75.487	0	0	0	CY Deng
					2-4	L2/3	105	17.0455	1	0	0	CY Deng
					3-4	L2/3	574	93.1818	0	0	0	CY Deng

## Sheet: Fig.2C-2
Date	Age	Genotype	Genotype	pair number	pair	cross barrel	distance(pixel)	distance(um)(/6.16)	Uni-direction	Bi-direction	Gap junction	experimenter
2019.5.6	p12	pcdhg+/+ nex+/+	control	2	1-2	0	280	45.4545	0	0	0	YJ Zhu		Summary for Fig.2C-Right
	p12				1-3	1	645	104.708	0	0	0	YJ Zhu		genotype	pair num	chemical connection	Uni-direction	Bi-direction	chemical connection rate
	p12				1-4	0	614	99.6753	0	0	0	YJ Zhu		pcdhg control	294	28	23	5	0.0952381
	p12				2-3	1	925	150.162	0	0	0	YJ Zhu		pcdhg KO	221	27	24	3	0.122172
	p12				2-4	0	334	54.2208	0	0	0	YJ Zhu
	p12				3-4	1	1259	204.383	0	0	0	YJ Zhu		Notes: distance more than 200um were not calculated
2019.5.11	p15	pcdhg+/+ nex+/+	control	5	1-2	1	705	114.448	0	0	0	YJ Zhu
	p15				1-4	1	1035	168.019	0	0	0	YJ Zhu
	p15				2-4	0	330	53.5714	0	0	0	YJ Zhu
2019.5.13	p11	pcdhg+/+ nex+/+	control	5	1-2	0	350	56.8182	0	1	0	YJ Zhu
	p11				1-3	1	606	98.3766	0	0	0	YJ Zhu
	p11				2-3	1	958	155.519	0	0	0	YJ Zhu
	p11			6	1-2	1	741	120.292	0	0	0	YJ Zhu
	p11				1-3	0	281	45.6169	0	0	0	YJ Zhu
	p11				1-4	1	1267	205.682	1	0	0	YJ Zhu
	p11				2-3	1	460	74.6753	0	0	0	YJ Zhu
	p11				2-4	0	526	85.3896	0	0	0	YJ Zhu
	p11				3-4	1	986	160.065	0	0	0	YJ Zhu
2019.5.19	p17	pcdhg+/+ nex+/+	control	2	1-3	0	438	71.1039	0	0	0	YJ Zhu
	p17				1-4	1	1082	175.649	0	0	0	YJ Zhu
	p17				1-5	1	648	105.195	0	0	0	YJ Zhu
	p17				1-6	2	1397	226.786	0	0	0	YJ Zhu
	p17				3-4	1	848	137.662	0	0	0	YJ Zhu
	p17				3-5	1	414	67.2078	1	0	0	YJ Zhu
	p17				3-6	2	1203	195.292	0	0	0	YJ Zhu
	p17				4-5	0	434	70.4545	0	1	0	YJ Zhu
	p17				4-6	1	355	57.6299	0	0	0	YJ Zhu
	p17				5-6	1	789	128.084	0	1	0	YJ Zhu
	p17			3	1-2	1	1645	267.045	0	0	0	YJ Zhu
	p17				1-3	0	438	71.1039	0	0	0	YJ Zhu
	p17				1-4	1	1397	226.786	0	0	0	YJ Zhu
	p17				1-5	0	762	123.701	0	0	0	YJ Zhu
	p17				1-6	1	1135	184.253	0	0	0	YJ Zhu
	p17				2-3	1	1207	195.942	0	0	0	YJ Zhu
	p17				2-4	0	248	40.2597	0	0	0	YJ Zhu
	p17				2-5	1	883	143.344	0	0	0	YJ Zhu
	p17				2-6	0	510	82.7922	0	0	0	YJ Zhu
	p17				3-4	1	959	155.682	0	0	0	YJ Zhu
	p17				3-5	0	324	52.5974	1	0	0	YJ Zhu
	p17				3-6	1	697	113.149	0	0	0	YJ Zhu
	p17				4-5	1	635	103.084	1	0	0	YJ Zhu
	p17				4-6	0	262	42.5325	0	0	0	YJ Zhu
2019.6.2	p20	pcdhg+/+ nex+/+	control	3	1-2	3	2223	360.877	0	0	0	YJ Zhu
	p20				1-3	1	735	119.318	0	0	0	YJ Zhu
	p20				1-4	2	1295	210.227	0	0	0	YJ Zhu
	p20				1-5	1	250	40.5844	0	0	0	YJ Zhu
	p20				2-3	2	1488	241.558	0	0	0	YJ Zhu
	p20				2-4	1	928	150.649	0	0	0	YJ Zhu
	p20				2-5	2	1414	229.545	0	0	0	YJ Zhu
	p20				3-4	1	560	90.9091	0	0	0	YJ Zhu
	p20				3-5	0	485	78.7338	1	0	0	YJ Zhu
	p20				4-5	1	1045	169.643	0	0	0	YJ Zhu
	p20			4	1-2	2	2196	356.494	0	0	0	YJ Zhu
	p20				1-3	1	715	116.071	0	0	0	YJ Zhu
	p20				1-4	2	1430	232.143	0	0	0	YJ Zhu
	p20				1-5	1	1090	176.948	0	0	0	YJ Zhu
	p20				1-6	2	1674	271.753	0	0	0	YJ Zhu
	p20				2-3	1	1481	240.422	0	0	0	YJ Zhu
	p20				2-4	0	766	124.351	0	0	0	YJ Zhu
	p20				2-5	1	1106	179.545	0	0	0	YJ Zhu
	p20				2-6	0	522	84.7403	0	0	0	YJ Zhu
	p20				3-4	1	715	116.071	0	0	0	YJ Zhu
	p20				3-5	0	375	60.8766	0	0	0	YJ Zhu
	p20				3-6	1	859	139.448	0	0	0	YJ Zhu
	p20				4-5	1	340	55.1948	0	0	0	YJ Zhu
	p20				4-6	0	244	39.6104	0	0	0	YJ Zhu
	p20				5-6	1	584	94.8052	1	0	0	YJ Zhu
2019.7.20	p15	pcdhg+/+ nex+/+	control	1	1-2	2	1354	219.805	0	0	0	YJ Zhu
	p15				1-3	0	156	25.3247	0	0	0	YJ Zhu
	p15				1-4	1	708	114.935	0	0	0	YJ Zhu
	p15				1-6	2	1174	190.584	0	0	0	YJ Zhu
	p15				2-3	2	1198	194.481	0	0	0	YJ Zhu
	p15				2-4	1	646	104.87	0	0	0	YJ Zhu
	p15				2-6	0	180	29.2208	0	0	0	YJ Zhu
	p15				3-4	1	552	89.6104	0	0	0	YJ Zhu
	p15				3-6	2	1018	165.26	0	0	0	YJ Zhu
	p15				4-6	1	466	75.6494	0	0	0	YJ Zhu
	p15			3	1-2	2	1586	257.468	0	0	0	YJ Zhu
	p15				1-3	1	244	39.6104	0	0	0	YJ Zhu
	p15				1-4	1	886	143.831	0	0	0	YJ Zhu
	p15				1-5	1	516	83.7662	0	0	0	YJ Zhu
	p15				1-6	2	1190	193.182	0	0	0	YJ Zhu
	p15				2-3	1	1341	217.695	0	0	0	YJ Zhu
	p15				2-4	1	710	115.26	0	0	0	YJ Zhu
	p15				2-5	1	1075	174.513	0	0	0	YJ Zhu
	p15				2-6	0	400	64.9351	0	0	0	YJ Zhu
	p15				3-4	0	638	103.571	0	0	0	YJ Zhu
	p15				3-5	0	276	44.8052	0	0	0	YJ Zhu
	p15				3-6	1	951	154.383	0	0	0	YJ Zhu
	p15				4-5	0	364	59.0909	0	0	0	YJ Zhu
	p15				4-6	1	318	51.6234	0	0	0	YJ Zhu
	p15				5-6	1	674	109.416	0	0	0	YJ Zhu
	p15			4	1-2	2	1553	252.11	0	0	0	YJ Zhu
	p15				1-3	0	398	64.6104	0	0	0	YJ Zhu
	p15				1-4	1	794	128.896	0	0	0	YJ Zhu
	p15				1-5	0	186	30.1948	0	0	0	YJ Zhu
	p15				1-6	1	1026	166.558	0	0	0	YJ Zhu
	p15				2-3	2	1155	187.5	0	0	0	YJ Zhu
	p15				2-4	1	759	123.214	0	0	0	YJ Zhu
	p15				2-5	2	1367	221.916	0	0	0	YJ Zhu
	p15				2-6	1	527	85.5519	0	0	0	YJ Zhu
	p15				3-4	1	396	64.2857	0	0	0	YJ Zhu
	p15				3-5	0	212	34.4156	0	0	0	YJ Zhu
	p15				3-6	1	628	101.948	0	0	0	YJ Zhu
	p15				4-5	1	608	98.7013	0	0	0	YJ Zhu
	p15				4-6	0	232	37.6623	0	0	0	YJ Zhu
	p15				5-6	1	840	136.364	0	0	0	YJ Zhu
2019.7.22	p17	pcdhg+/+ nex+/+	control	1	1-4	1	1024	166.234	0	0	0	YJ Zhu
	p17				1-5	1	778	126.299	0	0	0	YJ Zhu
	p17				1-6	2	1260	204.545	0	0	0	YJ Zhu
	p17				4-5	0	246	39.9351	1	0	0	YJ Zhu
	p17				4-6	1	236	38.3117	0	0	0	YJ Zhu
	p17				5-6	1	482	78.2468	0	0	0	YJ Zhu
	p17			2	1-2	2	1547	251.136	0	0	0	YJ Zhu
	p17				1-3	0	339	55.0325	1	0	0	YJ Zhu
	p17				1-4	1	1311	212.825	0	0	0	YJ Zhu
	p17				1-5	1	717	116.396	0	0	0	YJ Zhu
	p17				1-6	1	949	154.058	0	0	0	YJ Zhu
	p17				2-3	2	1208	196.104	0	0	0	YJ Zhu
	p17				2-4	1	236	38.3117	0	0	0	YJ Zhu
	p17				2-5	1	830	134.74	0	0	0	YJ Zhu
	p17				2-6	1	598	97.0779	0	0	0	YJ Zhu
	p17				3-4	1	972	157.792	0	0	0	YJ Zhu
	p17				3-5	1	378	61.3636	0	0	0	YJ Zhu
	p17				3-6	1	610	99.026	0	0	0	YJ Zhu
	p17				4-5	0	594	96.4286	0	0	0	YJ Zhu
	p17				4-6	0	362	58.7662	1	0	0	YJ Zhu
	p17				5-6	0	232	37.6623	1	0	0	YJ Zhu
2019.8.8	p13	pcdhg+/+ nex+/+	control	1	1-2	1	1574	255.519	0	0	0	YJ Zhu
	p13				1-3	1	1074	174.351	0	0	0	YJ Zhu
	p13				1-4	1	808	131.169	0	0	0	YJ Zhu
	p13				1-5	0	376	61.039	0	0	0	YJ Zhu
	p13				1-6	1	1228	199.351	0	0	0	YJ Zhu
	p13				2-3	0	600	97.4026	0	0	0	YJ Zhu
	p13				2-4	0	766	124.351	0	0	0	YJ Zhu
	p13				2-5	1	1198	194.481	0	0	0	YJ Zhu
	p13				2-6	0	346	56.1688	0	0	0	YJ Zhu
	p13				3-4	0	166	26.9481	0	0	0	YJ Zhu
	p13				3-5	1	598	97.0779	0	0	0	YJ Zhu
	p13				3-6	0	254	41.2338	0	0	0	YJ Zhu
	p13				4-5	1	432	70.1299	0	0	0	YJ Zhu
	p13				4-6	0	420	68.1818	0	0	0	YJ Zhu
	p13				5-6	1	852	138.312	0	0	0	YJ Zhu
	p13			4	1-2	2	1674	271.753	0	0	0	YJ Zhu
	p13				1-3	1	257	41.7208	0	0	0	YJ Zhu
	p13				1-4	2	1360	220.779	0	0	0	YJ Zhu
	p13				1-6	2	1096	177.922	0	0	0	YJ Zhu
	p13				2-3	1	1417	230.032	0	0	0	YJ Zhu
	p13				2-4	0	314	50.974	0	0	0	YJ Zhu
	p13				2-6	0	578	93.8312	0	0	0	YJ Zhu
	p13				3-4	1	1103	179.058	0	0	0	YJ Zhu
	p13				3-6	1	839	136.201	0	0	0	YJ Zhu
	p13				4-6	0	264	42.8571	0	0	0	YJ Zhu
2019.8.10	p18	pcdhg+/+ nex+/+	control	2	1-4	1	1180	191.558	0	0	0	YJ Zhu
2019.8.18	p14	pcdhg+/+ nex+/+	control	1	1-2	2	1822	295.779	0	0	0	YJ Zhu
	p14				1-3	1	316	51.2987	0	0	0	YJ Zhu
	p14				1-4	2	1582	256.818	0	0	0	YJ Zhu
	p14				1-5	1	660	107.143	0	0	0	YJ Zhu
	p14				1-6	2	1272	206.494	0	0	0	YJ Zhu
	p14				2-3	1	1506	244.481	0	0	0	YJ Zhu
	p14				2-4	0	240	38.961	0	0	0	YJ Zhu
	p14				2-5	1	1162	188.636	0	0	0	YJ Zhu
	p14				2-6	0	550	89.2857	0	0	0	YJ Zhu
	p14				3-4	1	1266	205.519	0	0	0	YJ Zhu
	p14				3-5	0	344	55.8442	0	0	0	YJ Zhu
	p14				3-6	1	956	155.195	0	0	0	YJ Zhu
	p14				4-5	1	922	149.675	1	0	0	YJ Zhu
	p14				4-6	0	310	50.3247	0	0	0	YJ Zhu
	p14				5-6	1	612	99.3506	0	0	0	YJ Zhu
	p14			2	1-2	1	1837	298.214	0	0	0	YJ Zhu
	p14				1-3	0	220	35.7143	0	0	0	YJ Zhu
	p14				1-4	1	1705	276.786	0	0	0	YJ Zhu
	p14				1-5	0	522	84.7403	0	0	0	YJ Zhu
	p14				1-6	1	1207	195.942	0	0	0	YJ Zhu
	p14				2-3	1	1617	262.5	0	0	0	YJ Zhu
	p14				2-4	0	132	21.4286	0	0	0	YJ Zhu
	p14				2-5	1	1215	197.24	0	0	0	YJ Zhu
	p14				2-6	0	530	86.039	0	0	0	YJ Zhu
	p14				3-4	1	1385	224.838	0	0	0	YJ Zhu
	p14				3-5	0	302	49.026	0	0	0	YJ Zhu
	p14				3-6	1	987	160.227	0	0	0	YJ Zhu
	p14				4-5	1	1083	175.812	0	0	0	YJ Zhu
	p14				4-6	0	398	64.6104	0	0	0	YJ Zhu
	p14				5-6	1	685	111.201	0	0	0	YJ Zhu
	p14			3	1-2	1	1344	218.182	0	0	0	YJ Zhu
	p14				1-4	1	1110	180.195	0	0	0	YJ Zhu
	p14				1-5	0	462	75	0	0	0	YJ Zhu
	p14				2-4	0	234	37.987	0	0	0	YJ Zhu
	p14				2-5	1	882	143.182	1	0	0	YJ Zhu
	p14				4-5	1	648	105.195	0	0	0	YJ Zhu
2019.8.19	p15	pcdhg+/+ nex+/+	control	1	1-2	1	1642	266.558	0	0	0	YJ Zhu
	p15				1-3	0	214	34.7403	1	0	0	YJ Zhu
	p15				1-4	1	1450	235.39	0	0	0	YJ Zhu
	p15				2-3	1	1428	231.818	0	0	0	YJ Zhu
	p15				2-4	0	192	31.1688	0	0	0	YJ Zhu
	p15				3-4	1	1236	200.649	0	0	0	YJ Zhu
2019.9.7	p11	pcdhg+/+ nex+/+	control	1	1-2	1	1408	228.571	0	0	0	YJ Zhu
	p11				1-3	0	280	45.4545	0	0	0	YJ Zhu
	p11				1-4	1	1198	194.481	1	0	0	YJ Zhu
	p11				1-5	0	474	76.9481	0	0	0	YJ Zhu
	p11				1-6	1	944	153.247	0	0	0	YJ Zhu
	p11				2-3	1	1128	183.117	0	0	0	YJ Zhu
	p11				2-4	0	2140	347.403	0	0	0	YJ Zhu
	p11				2-5	1	935	151.786	0	0	0	YJ Zhu
	p11				2-6	0	464	75.3247	0	0	0	YJ Zhu
	p11				3-4	1	918	149.026	0	0	0	YJ Zhu
	p11				3-5	0	194	31.4935	0	0	0	YJ Zhu
	p11				3-6	1	664	107.792	0	0	0	YJ Zhu
	p11				4-5	1	724	117.532	0	0	0	YJ Zhu
	p11				4-6	0	254	41.2338	0	0	0	YJ Zhu
	p11				5-6	1	470	76.2987	1	0	0	YJ Zhu
	p11			2	1-2	2	1482	240.584	0	0	0	YJ Zhu
	p11				1-3	0	280	45.4545	0	0	0	YJ Zhu
	p11				1-4	1	1272	206.494	0	0	0	YJ Zhu
	p11				1-5	0	400	64.9351	0	0	0	YJ Zhu
	p11				1-6	1	944	153.247	0	0	0	YJ Zhu
	p11				2-3	2	1320	214.286	0	0	0	YJ Zhu
	p11				2-4	1	302	49.026	0	0	0	YJ Zhu
	p11				2-5	2	1082	175.649	0	0	0	YJ Zhu
	p11				2-6	1	538	87.3377	0	0	0	YJ Zhu
	p11				3-4	1	1018	165.26	0	0	0	YJ Zhu
	p11				3-5	0	238	38.6364	0	0	0	YJ Zhu
	p11				3-6	1	782	126.948	0	0	0	YJ Zhu
	p11				4-5	1	780	126.623	0	0	0	YJ Zhu
	p11				4-6	0	236	38.3117	1	0	0	YJ Zhu
	p11				5-6	1	544	88.3117	0	0	0	YJ Zhu
	p11			3	1-2	1	1333	216.396	0	0	0	YJ Zhu
	p11				1-3	0	286	46.4286	0	0	0	YJ Zhu
	p11				1-4	1	907	147.24	0	0	0	YJ Zhu
	p11				1-5	0	525	85.2273	0	0	0	YJ Zhu
	p11				1-6	1	1067	173.214	0	0	0	YJ Zhu
	p11				2-3	1	1047	169.968	0	0	0	YJ Zhu
	p11				2-4	0	426	69.1558	0	0	0	YJ Zhu
	p11				2-5	1	808	131.169	0	0	0	YJ Zhu
	p11				2-6	0	266	43.1818	1	0	0	YJ Zhu
	p11				3-4	1	621	100.812	0	0	0	YJ Zhu
	p11				3-5	0	239	38.7987	1	0	0	YJ Zhu
	p11				3-6	1	781	126.786	0	0	0	YJ Zhu
	p11				4-5	1	382	62.013	0	0	0	YJ Zhu
	p11				4-6	0	160	25.974	0	0	0	YJ Zhu
	p11				5-6	1	542	87.987	0	0	0	YJ Zhu
	p11			4	1-2	1	1291	209.578	0	0	0	YJ Zhu
	p11				1-3	0	168	27.2727	0	0	0	YJ Zhu
	p11				1-5	0	427	69.3182	0	0	0	YJ Zhu
	p11				1-6	1	827	134.253	0	0	0	YJ Zhu
	p11				2-3	1	1123	182.305	0	0	0	YJ Zhu
	p11				2-5	1	864	140.26	0	0	0	YJ Zhu
	p11				2-6	0	464	75.3247	0	0	0	YJ Zhu
	p11				3-5	0	259	42.0455	0	0	0	YJ Zhu
	p11				3-6	1	659	106.981	0	0	0	YJ Zhu
	p11				5-6	1	400	64.9351	0	0	0	YJ Zhu
2019.10.12	p11	pcdhg+/+ nex+/+	control	1	1-2	1	1205	195.617	0	0	0	YJ Zhu
	p11				1-3	0	345	56.0065	0	1	0	YJ Zhu
	p11				1-5	0	145	23.539	0	0	0	YJ Zhu
	p11				1-6	1	1015	164.773	0	0	0	YJ Zhu
	p11				2-3	1	860	139.61	0	0	0	YJ Zhu
	p11				2-5	1	1060	172.078	0	0	0	YJ Zhu
	p11				2-6	0	190	30.8442	0	0	0	YJ Zhu
	p11				3-5	0	200	32.4675	1	0	0	YJ Zhu
	p11				3-6	1	670	108.766	0	0	0	YJ Zhu
	p11				5-6	1	870	141.234	0	0	0	YJ Zhu
	p11			2	1-2	1	1171	190.097	0	0	0	YJ Zhu
	p11				1-3	0	335	54.3831	0	0	0	YJ Zhu
	p11				1-4	1	735	119.318	0	0	0	YJ Zhu
	p11				1-5	0	174	28.2468	0	0	0	YJ Zhu
	p11				1-6	1	939	152.435	0	0	0	YJ Zhu
	p11				2-3	1	836	135.714	0	0	0	YJ Zhu
	p11				2-4	0	436	70.7792	0	0	0	YJ Zhu
	p11				2-5	1	997	161.851	0	0	0	YJ Zhu
	p11				2-6	0	232	37.6623	0	0	0	YJ Zhu
	p11				3-4	1	400	64.9351	0	0	0	YJ Zhu
	p11				3-5	0	161	26.1364	0	0	0	YJ Zhu
	p11				3-6	1	604	98.0519	0	0	0	YJ Zhu
	p11				4-5	1	561	91.0714	0	0	0	YJ Zhu
	p11				4-6	0	204	33.1169	0	0	0	YJ Zhu
	p11				5-6	1	765	124.188	0	0	0	YJ Zhu
	p11			3	1-2	1	1056	171.429	0	0	0	YJ Zhu
	p11				1-3	0	327	53.0844	0	0	0	YJ Zhu
	p11				1-5	0	155	25.1623	0	0	0	YJ Zhu
	p11				2-3	1	729	118.344	0	0	0	YJ Zhu
	p11				2-5	1	901	146.266	0	0	0	YJ Zhu
	p11				3-5	0	172	27.9221	0	0	0	YJ Zhu
2019.10.13	p12	pcdhg+/+ nex+/+	control	1	1-2	1	1163	188.799	0	0	0	YJ Zhu
	p12				1-3	0	208	33.7662	0	0	0	YJ Zhu
	p12				1-4	1	893	144.968	0	0	0	YJ Zhu
	p12				1-5	0	390	63.3117	0	0	0	YJ Zhu
	p12				1-6	1	654	106.169	0	0	0	YJ Zhu
	p12				2-3	1	955	155.032	0	0	0	YJ Zhu
	p12				2-4	0	270	43.8312	0	0	0	YJ Zhu
	p12				2-5	1	773	125.487	0	0	0	YJ Zhu
	p12				2-6	0	509	82.6299	0	0	0	YJ Zhu
	p12				3-4	1	685	111.201	0	0	0	YJ Zhu
	p12				3-5	0	182	29.5455	0	0	0	YJ Zhu
	p12				3-6	1	446	72.4026	0	0	0	YJ Zhu
	p12				4-5	1	503	81.6558	0	0	0	YJ Zhu
	p12				4-6	0	239	38.7987	0	0	0	YJ Zhu
	p12				5-6	1	264	42.8571	0	0	0	YJ Zhu
	p12			2	1-2	1	984	159.74	0	0	0	YJ Zhu
	p12				1-3	0	436	70.7792	0	0	0	YJ Zhu
	p12				1-4	1	814	132.143	0	0	0	YJ Zhu
	p12				1-5	0	296	48.0519	0	0	0	YJ Zhu
	p12				2-3	1	548	88.961	0	0	0	YJ Zhu
	p12				2-4	0	170	27.5974	0	0	0	YJ Zhu
	p12				2-5	1	688	111.688	0	0	0	YJ Zhu
	p12				3-4	1	378	61.3636	0	0	0	YJ Zhu
	p12				3-5	0	140	22.7273	0	0	0	YJ Zhu
	p12				4-5	1	518	84.0909	0	0	0	YJ Zhu
	p12			3	1-2	1	1084	175.974	0	0	0	YJ Zhu
	p12				1-3	0	417	67.6948	1	0	0	YJ Zhu
	p12				1-4	1	707	114.773	0	0	0	YJ Zhu
	p12				1-5	0	226	36.6883	0	0	0	YJ Zhu
	p12				1-6	1	846	137.338	0	0	0	YJ Zhu
	p12				2-3	1	667	108.279	0	0	0	YJ Zhu
	p12				2-4	0	377	61.2013	0	0	0	YJ Zhu
	p12				2-5	1	858	139.286	0	0	0	YJ Zhu
	p12				2-6	0	238	38.6364	1	0	0	YJ Zhu
	p12				3-4	1	290	47.0779	0	0	0	YJ Zhu
	p12				3-5	0	191	31.0065	1	0	0	YJ Zhu
	p12				3-6	1	429	69.6429	0	0	0	YJ Zhu
	p12				4-5	1	481	78.0844	0	0	0	YJ Zhu
	p12				4-6	0	139	22.5649	0	0	0	YJ Zhu
	p12				5-6	1	620	100.649	1	0	0	YJ Zhu
	p12			4	1-2	1	1030	167.208	0	0	0	YJ Zhu
	p12				1-4	1	898	145.779	0	0	0	YJ Zhu
	p12				1-5	0	135	21.9156	0	1	0	YJ Zhu
	p12				1-6	1	698	113.312	0	0	0	YJ Zhu
	p12				2-4	0	132	21.4286	0	0	0	YJ Zhu
	p12				2-5	1	895	145.292	0	0	0	YJ Zhu
	p12				2-6	0	332	53.8961	0	0	0	YJ Zhu
	p12				4-5	1	763	123.864	0	0	0	YJ Zhu
	p12				4-6	0	200	32.4675	0	0	0	YJ Zhu
	p12				5-6	1	563	91.3961	1	0	0	YJ Zhu
2019.5.7	p12	pcdhgf/f nex+/-	KO	3	1-2	0	255	41.3961	0	0	0	YJ Zhu
	p12				1-3	1	290	47.0779	0	0	0	YJ Zhu
	p12				1-4	1	825	133.929	0	0	0	YJ Zhu
	p12				2-3	1	545	88.474	0	0	0	YJ Zhu
	p12				2-4	1	570	92.5325	0	0	0	YJ Zhu
	p12				3-4	2	1115	181.006	0	0	0	YJ Zhu
	p12			4	1-2	1	440	71.4286	0	0	0	YJ Zhu
	p12				1-3	0	354	57.4675	0	0	0	YJ Zhu
	p12				1-4	1	870	141.234	0	0	0	YJ Zhu
	p12				2-3	1	794	128.896	0	0	0	YJ Zhu
	p12				2-4	0	430	69.8052	0	0	0	YJ Zhu
	p12				3-4	1	1224	198.701	0	0	0	YJ Zhu
2019.5.25	p13	pcdhgf/f nex+/+	KO	1	1-2	2	2302	373.701	0	0	0	YJ Zhu
	p13				1-5	1	1098	178.247	0	0	0	YJ Zhu
	p13				2-5	1	1204	195.455	0	0	0	YJ Zhu
	p13			2	1-2	3	2124	344.805	0	0	0	YJ Zhu
	p13				1-3	0	354	57.4675	0	0	0	YJ Zhu
	p13				1-4	2	1678	272.403	0	0	0	YJ Zhu
	p13				1-5	1	876	142.208	0	0	0	YJ Zhu
	p13				1-6	2	1186	192.532	0	0	0	YJ Zhu
	p13				2-3	3	1770	287.338	0	0	0	YJ Zhu
	p13				2-4	1	446	72.4026	0	0	0	YJ Zhu
	p13				2-5	2	1248	202.597	0	0	0	YJ Zhu
	p13				2-6	1	938	152.273	0	0	0	YJ Zhu
	p13				3-4	2	1324	214.935	0	0	0	YJ Zhu
	p13				3-5	1	522	84.7403	0	0	0	YJ Zhu
	p13				3-6	2	832	135.065	0	0	0	YJ Zhu
	p13				4-5	1	802	130.195	0	0	0	YJ Zhu
	p13				4-6	0	492	79.8701	1	0	0	YJ Zhu
	p13				5-6	1	310	50.3247	0	0	0	YJ Zhu
2019.6.1	p19	pcdhgf/f nex+/+	KO	1	2-5	1	1137	184.578	0	0	0	YJ Zhu
	p19				2-6	1	409	66.3961	0	0	0	YJ Zhu
	p19				5-6	0	728	118.182	0	0	0	YJ Zhu
	p19			2	1-2	2	2003	325.162	0	0	0	YJ Zhu
	p19				1-3	0	406	65.9091	0	0	0	YJ Zhu
	p19				1-5	1	622	100.974	0	0	0	YJ Zhu
	p19				1-6	1	938	152.273	0	0	0	YJ Zhu
	p19				2-3	2	1597	259.253	0	0	0	YJ Zhu
	p19				2-5	1	1381	224.188	0	0	0	YJ Zhu
	p19				2-6	1	1065	172.89	0	0	0	YJ Zhu
	p19				3-5	1	216	35.0649	0	0	0	YJ Zhu
	p19				3-6	1	532	86.3636	0	0	0	YJ Zhu
	p19				5-6	0	316	51.2987	1	0	0	YJ Zhu
	p19			3	1-2	2	2065	335.227	0	0	0	YJ Zhu
	p19				1-3	0	392	63.6364	0	0	0	YJ Zhu
	p19				1-4	2	1739	282.305	0	0	0	YJ Zhu
	p19				1-5	1	1227	199.188	0	0	0	YJ Zhu
	p19				1-6	1	1676	272.078	0	0	0	YJ Zhu
	p19				2-3	2	1673	271.591	0	0	0	YJ Zhu
	p19				2-4	0	326	52.9221	0	0	0	YJ Zhu
	p19				2-5	1	1287	208.929	0	0	0	YJ Zhu
	p19				2-6	1	838	136.039	0	0	0	YJ Zhu
	p19				3-4	2	1347	218.669	0	0	0	YJ Zhu
	p19				3-5	1	386	62.6623	0	0	0	YJ Zhu
	p19				3-6	1	835	135.552	0	0	0	YJ Zhu
	p19				4-5	1	961	156.006	0	0	0	YJ Zhu
	p19				4-6	1	512	83.1169	0	0	0	YJ Zhu
	p19				5-6	0	449	72.8896	0	0	0	YJ Zhu
2019.6.4	p17	pcdhgf/f nex+/+	KO	1	1-3	1	455	73.8636	1	0	0	YJ Zhu
	p17				1-4	2	1402	227.597	0	0	0	YJ Zhu
	p17				1-6	3	2005	325.487	0	0	0	YJ Zhu
	p17				3-4	1	947	153.734	0	0	0	YJ Zhu
	p17				3-6	2	1550	251.623	0	0	0	YJ Zhu
	p17				4-6	1	603	97.8896	0	0	0	YJ Zhu
	p17			2	1-2	2	2508	407.143	0	0	0	YJ Zhu
	p17				1-4	1	1453	235.877	0	0	0	YJ Zhu
	p17				1-6	2	2157	350.162	0	0	0	YJ Zhu
	p17				2-4	1	1055	171.266	0	0	0	YJ Zhu
	p17				2-6	0	351	56.9805	0	0	0	YJ Zhu
	p17				4-6	1	704	114.286	0	0	0	YJ Zhu
	p17			3	1-2	3	2518	408.766	0	0	0	YJ Zhu
	p17				1-3	1	932	151.299	0	0	0	YJ Zhu
	p17				1-4	2	1526	247.727	0	0	0	YJ Zhu
	p17				1-5	1	590	95.7792	0	0	0	YJ Zhu
	p17				1-6	2	2018	327.597	0	0	0	YJ Zhu
	p17				2-3	2	1586	257.468	0	0	0	YJ Zhu
	p17				2-4	1	992	161.039	0	0	0	YJ Zhu
	p17				2-5	2	1928	312.987	0	0	0	YJ Zhu
	p17				2-6	1	500	81.1688	0	0	0	YJ Zhu
	p17				3-4	1	594	96.4286	0	0	0	YJ Zhu
	p17				3-5	0	342	55.5195	0	0	0	YJ Zhu
	p17				3-6	1	1086	176.299	0	0	0	YJ Zhu
	p17				4-5	1	936	151.948	0	0	0	YJ Zhu
	p17				4-6	0	492	79.8701	1	0	0	YJ Zhu
	p17				5-6	1	1428	231.818	0	0	0	YJ Zhu
2019.6.8	p18	pcdhgf/f nex+/-	KO	1	1-2	2	3166	513.961	0	0	0	YJ Zhu
	p18				1-5	1	1364	221.429	0	0	0	YJ Zhu
	p18				1-6	1	2006	325.649	0	0	0	YJ Zhu
	p18				2-5	1	1802	292.532	0	0	0	YJ Zhu
	p18				2-6	1	1160	188.312	1	0	0	YJ Zhu
	p18				5-6	0	642	104.221	0	0	0	YJ Zhu
2019.7.9	p19	pcdhgf/f nex+/+	KO	1	2-3	1	1019	165.422	0	0	0	YJ Zhu
	p19				2-5	2	1766	286.688	0	0	0	YJ Zhu
	p19				2-6	1	719	116.721	0	0	0	YJ Zhu
	p19				3-5	1	752	122.078	0	0	0	YJ Zhu
	p19				3-6	0	306	49.6753	0	0	0	YJ Zhu
	p19				5-6	1	1046	169.805	0	0	0	YJ Zhu
	p19			2	1-2	2	1517	246.266	0	0	0	YJ Zhu
	p19				1-3	0	268	43.5065	0	0	0	YJ Zhu
	p19				1-4	2	1185	192.37	0	0	0	YJ Zhu
	p19				1-5	0	456	74.026	0	0	0	YJ Zhu
	p19				1-6	1	873	141.721	0	0	0	YJ Zhu
	p19				2-3	2	1249	202.76	0	0	0	YJ Zhu
	p19				2-4	0	332	53.8961	0	0	0	YJ Zhu
	p19				2-5	2	1061	172.24	0	0	0	YJ Zhu
	p19				2-6	1	644	104.545	0	0	0	YJ Zhu
	p19				3-4	2	917	148.864	0	0	0	YJ Zhu
	p19				3-5	0	188	30.5195	0	0	0	YJ Zhu
	p19				3-6	1	605	98.2143	0	0	0	YJ Zhu
	p19				4-5	2	729	118.344	0	0	0	YJ Zhu
	p19				4-6	1	312	50.6494	0	0	0	YJ Zhu
	p19				5-6	1	417	67.6948	0	0	0	YJ Zhu
	p19			3	2-3	1	830	134.74	0	0	0	YJ Zhu
	p19				2-4	0	386	62.6623	1	0	0	YJ Zhu
	p19				2-5	1	648	105.195	0	0	0	YJ Zhu
	p19				2-6	0	494	80.1948	0	0	0	YJ Zhu
	p19				3-4	1	444	72.0779	1	0	0	YJ Zhu
	p19				3-5	0	182	29.5455	0	0	0	YJ Zhu
	p19				3-6	1	336	54.5455	0	0	0	YJ Zhu
	p19				4-5	1	262	42.5325	0	0	0	YJ Zhu
	p19				4-6	0	108	17.5325	0	0	0	YJ Zhu
	p19				5-6	1	154	25	0	0	0	YJ Zhu
2019.7.16	p20	pcdhgf/f nex+/+	KO	1	2-3	1	1281	207.955	0	0	0	YJ Zhu
	p20				2-4	0	572	92.8571	1	0	0	YJ Zhu
	p20				2-5	1	841	136.526	0	0	0	YJ Zhu
	p20				2-6	0	368	59.7403	0	0	0	YJ Zhu
	p20				3-4	1	709	115.097	0	0	0	YJ Zhu
	p20				3-5	0	340	55.1948	0	0	0	YJ Zhu
	p20				3-6	1	913	148.214	0	0	0	YJ Zhu
	p20				4-5	1	369	59.9026	0	0	0	YJ Zhu
	p20				4-6	0	204	33.1169	0	0	0	YJ Zhu
	p20				5-6	1	573	93.0195	0	0	0	YJ Zhu
	p20			2	1-2	1	1902	308.766	0	0	0	YJ Zhu
	p20				1-3	0	832	135.065	0	0	0	YJ Zhu
	p20				1-4	1	1546	250.974	0	0	0	YJ Zhu
	p20				1-5	0	526	85.3896	0	0	0	YJ Zhu
	p20				2-3	1	1070	173.701	0	0	0	YJ Zhu
	p20				2-4	0	356	57.7922	0	0	0	YJ Zhu
	p20				2-5	1	1376	223.377	0	0	0	YJ Zhu
	p20				3-4	1	714	115.909	0	0	0	YJ Zhu
	p20				3-5	0	306	49.6753	0	0	0	YJ Zhu
	p20				4-5	1	1020	165.584	0	0	0	YJ Zhu
	p20			3	1-4	2	1579	256.331	0	0	0	YJ Zhu
	p20				1-5	1	641	104.058	0	0	0	YJ Zhu
	p20				1-6	2	1331	216.071	0	0	0	YJ Zhu
	p20				4-5	1	938	152.273	0	0	0	YJ Zhu
	p20				4-6	0	248	40.2597	0	0	0	YJ Zhu
	p20				5-6	1	690	112.013	0	0	0	YJ Zhu
2019.7.21	p16	pcdhgf/f nex+/+	KO	2	1-3	1	663	107.63	0	0	0	YJ Zhu
	p16				1-4	2	1191	193.344	0	0	0	YJ Zhu
	p16				1-5	1	318	51.6234	1	0	0	YJ Zhu
	p16				1-6	1	939	152.435	0	1	0	YJ Zhu
	p16				3-4	1	528	85.7143	0	0	0	YJ Zhu
	p16				3-5	0	345	56.0065	1	0	0	YJ Zhu
	p16				3-6	0	276	44.8052	1	0	0	YJ Zhu
	p16				4-5	1	873	141.721	0	0	0	YJ Zhu
	p16				4-6	1	252	40.9091	0	0	0	YJ Zhu
	p16				5-6	0	621	100.812	0	1	0	YJ Zhu
	p16			3	1-2	1	1513	245.617	1	0	0	YJ Zhu
	p16				1-3	0	240	38.961	0	0	0	YJ Zhu
	p16				1-4	1	980	159.091	0	0	0	YJ Zhu
	p16				1-5	0	480	77.9221	0	0	0	YJ Zhu
	p16				1-6	1	1247	202.435	0	0	0	YJ Zhu
	p16				2-3	1	1273	206.656	0	0	0	YJ Zhu
	p16				2-4	0	533	86.526	0	0	0	YJ Zhu
	p16				2-5	1	1033	167.695	0	0	0	YJ Zhu
	p16				2-6	0	266	43.1818	0	0	0	YJ Zhu
	p16				3-4	1	740	120.13	0	0	0	YJ Zhu
	p16				3-5	0	240	38.961	0	0	0	YJ Zhu
	p16				3-6	1	1007	163.474	0	0	0	YJ Zhu
	p16				4-5	1	500	81.1688	0	0	0	YJ Zhu
	p16				4-6	0	267	43.3442	0	0	0	YJ Zhu
	p16				5-6	1	767	124.513	1	0	0	YJ Zhu
2019.7.23	p18	pcdhgf/f nex+/+	KO	1	1-2	1	1518	246.429	0	0	0	YJ Zhu
	p18				1-4	1	1023	166.071	0	0	0	YJ Zhu
	p18				1-5	1	736	119.481	0	0	0	YJ Zhu
	p18				1-6	1	1194	193.831	0	0	0	YJ Zhu
	p18				2-4	0	495	80.3571	0	0	0	YJ Zhu
	p18				2-5	0	782	126.948	0	0	0	YJ Zhu
	p18				2-6	0	324	52.5974	0	0	0	YJ Zhu
	p18				4-5	0	287	46.5909	1	0	0	YJ Zhu
	p18				4-6	0	171	27.7597	0	0	0	YJ Zhu
	p18				5-6	0	458	74.3506	0	0	0	YJ Zhu
	p18			2	1-2	1	1592	258.442	0	0	0	YJ Zhu
	p18				1-3	0	648	105.195	1	0	0	YJ Zhu
	p18				1-4	1	1284	208.442	0	0	0	YJ Zhu
	p18				1-5	0	3445	559.253	0	0	0	YJ Zhu
	p18				1-6	1	1021	165.747	0	0	0	YJ Zhu
	p18				2-3	1	944	153.247	0	0	0	YJ Zhu
	p18				2-4	0	308	50	0	0	0	YJ Zhu
	p18				2-5	1	1247	202.435	0	0	0	YJ Zhu
	p18				2-6	0	572	92.8571	0	0	0	YJ Zhu
	p18				3-4	1	636	103.247	0	0	0	YJ Zhu
	p18				3-5	0	303	49.1883	0	0	0	YJ Zhu
	p18				3-6	1	372	60.3896	0	1	0	YJ Zhu
	p18				4-5	1	939	152.435	0	0	0	YJ Zhu
	p18				4-6	0	264	42.8571	1	0	0	YJ Zhu
	p18				5-6	1	675	109.578	0	0	0	YJ Zhu
2019.9.8	p12	pcdhgf/f nex+/+	KO	1	1-2	1	1386	225	0	0	0	YJ Zhu
	p12				1-3	0	452	73.3766	0	0	0	YJ Zhu
	p12				1-4	1	904	146.753	0	0	0	YJ Zhu
	p12				1-5	0	164	26.6234	0	0	0	YJ Zhu
	p12				1-6	1	1250	202.922	0	0	0	YJ Zhu
	p12				2-3	1	934	151.623	0	0	0	YJ Zhu
	p12				2-4	0	482	78.2468	0	0	0	YJ Zhu
	p12				2-5	1	1224	198.701	0	0	0	YJ Zhu
	p12				2-6	0	136	22.0779	0	0	0	YJ Zhu
	p12				3-4	1	452	73.3766	0	0	0	YJ Zhu
	p12				3-5	0	288	46.7532	0	0	0	YJ Zhu
	p12				3-6	1	798	129.545	0	0	0	YJ Zhu
	p12				4-5	1	740	120.13	0	0	0	YJ Zhu
	p12				4-6	0	346	56.1688	0	0	0	YJ Zhu
	p12				5-6	1	452	73.3766	0	0	0	YJ Zhu
	p12			2	1-2	1	1281	207.955	0	0	0	YJ Zhu
	p12				1-3	0	407	66.0714	0	0	0	YJ Zhu
	p12				1-4	1	937	152.11	0	0	0	YJ Zhu
	p12				1-5	0	207	33.6039	0	0	0	YJ Zhu
	p12				1-6	1	1077	174.838	0	0	0	YJ Zhu
	p12				2-3	1	874	141.883	1	0	0	YJ Zhu
	p12				2-4	0	344	55.8442	0	0	0	YJ Zhu
	p12				2-5	1	1074	174.351	0	0	0	YJ Zhu
	p12				2-6	0	204	33.1169	0	0	0	YJ Zhu
	p12				3-4	1	530	86.039	0	0	0	YJ Zhu
	p12				3-5	0	200	32.4675	0	0	0	YJ Zhu
	p12				3-6	1	670	108.766	0	0	0	YJ Zhu
	p12				4-5	1	730	118.506	1	0	0	YJ Zhu
	p12				4-6	0	140	22.7273	0	0	0	YJ Zhu
	p12				5-6	1	870	141.234	0	0	0	YJ Zhu
	p12			3	1-2	1	1159	188.149	0	0	0	YJ Zhu
	p12				1-3	0	402	65.2597	0	0	0	YJ Zhu
	p12				1-4	1	919	149.188	0	0	0	YJ Zhu
	p12				1-5	0	148	24.026	1	0	0	YJ Zhu
	p12				1-6	1	711	115.422	0	0	0	YJ Zhu
	p12				2-3	1	757	122.89	0	0	0	YJ Zhu
	p12				2-4	0	240	38.961	0	0	0	YJ Zhu
	p12				2-5	1	1011	164.123	0	0	0	YJ Zhu
	p12				2-6	0	448	72.7273	1	0	0	YJ Zhu
	p12				3-4	1	517	83.9286	0	0	0	YJ Zhu
	p12				3-5	0	254	41.2338	1	0	0	YJ Zhu
	p12				3-6	1	309	50.1623	0	0	0	YJ Zhu
	p12				4-5	1	771	125.162	1	0	0	YJ Zhu
	p12				4-6	0	208	33.7662	0	0	0	YJ Zhu
	p12				5-6	1	563	91.3961	0	0	0	YJ Zhu
	p12			4	1-3	0	181	29.3831	0	0	0	YJ Zhu
	p12				1-4	1	905	146.916	0	0	0	YJ Zhu
	p12				3-4	1	724	117.532	0	0	0	YJ Zhu
Date	Age	Genotype	Genotype	pair number	pair	column	distance(pixel)	distance(um)	Uni-direction	Bi-direction	Gap junction
2019.5.25	p13	pcdhgf/f nex+/+	ko	1	1-2	1	415	67.3701	0	0	0	CY Deng
					1-3	0	413	67.0455	0	0	0	CY Deng
					1-4	2	1143	185.552	0	0	0	CY Deng
					2-3	1	820	133.117	1	0	0	CY Deng
					2-4	1	726	117.857	0	0	0	CY Deng
					3-4	2	1542	250.325	0	0	0	CY Deng
				2	1-3	0	300	48.7013	1	0	0	CY Deng
				3	2-3	1	820	133.117	0	0	0	CY Deng
				4	1-2	0	531	86.2013	1	0	0	CY Deng
					1-3	1	374	60.7143	0	0	0	CY Deng
					1-4	1	999	162.175	0	0	0	CY Deng
					2-3	1	896	145.455	0	0	0	CY Deng
					2-4	1	488	79.2208	0	0	0	CY Deng
					3-4	2	1374	223.052	0	0	0	CY Deng
					3-4	2	1341	217.695	1	0	0	CY Deng
2019.06.04	p17	pcdhgf/f nex+/+	ko	1	2-3	1	1144	185.714	0	0	0	CY Deng
					2-4	1	1004	162.987	0	0	0	CY Deng
					3-4	2	2248	364.935	0	0	0	CY Deng
				6	3-4	2	1586	257.468	0	0	0	CY Deng
2019.06.08	p18	pcdhgf/f nex+/-	ko	4	1-2	1	450	73.0519	0	0	0	CY Deng
					1-3	0	444	72.0779	0	0	0	CY Deng
					1-4	2	910	147.727	0	0	0	CY Deng
					2-3	1	898	145.779	0	0	0	CY Deng
					2-4	1	455	73.8636	0	0	0	CY Deng
					3-4	2	1347	218.669	0	0	0	CY Deng
				5	1-4	2	1237	200.812	0	0	0	CY Deng
				6	1-2	1	364	59.0909	0	0	0	CY Deng
					1-3	0	360	58.4416	0	0	0	CY Deng
					1-4	1	768	124.675	0	0	0	CY Deng
					2-3	1	728	118.182	0	0	0	CY Deng
					2-4	0	400	64.9351	0	0	0	CY Deng
					3-4	1	1124	182.468	0	0	0	CY Deng
2019.06.02	p20	pcdhg+/+ nex+/+	control	1	1-2	0	226	36.6883	0	0	0	CY Deng
					1-3	1	478	77.5974	0	0	0	CY Deng
					1-4	0	714	115.909	0	0	0	CY Deng
					2-3	1	708	114.935	0	0	0	CY Deng
					2-4	0	492	79.8701	0	0	0	CY Deng
					3-4	1	1194	193.831	0	0	0	CY Deng
				2	2-3	1	877	142.37	0	0	0	CY Deng
					2-4	1	460	74.6753	0	0	0	CY Deng
