# Supplementary material for: Combinatorial expression of γ-protocadherins regulates synaptic connectivity in the mouse neocortex
Source: eLife. 2024 Mar 12;12:RP89532. doi: 10.7554/eLife.89532 (PMC10932546; doi:10.7554/eLife.89532)
Supplement: Figure 3—source data 3. [file elife-89532-fig3-data3.xlsx]

## Sheet: Fig.3E-6 isoforms
Date	Age		total	Uni-direction	Bi-direction	Gap junction	experimenter
2018.5.14	P13	G-G	9	0	0	1	YJ Zhu
		G-N	3	0	0	0	YJ Zhu		Summary for Fig.3E- 6 isoforms
		N-N	0	0	0	0	YJ Zhu			Total	connection	Uni-direction	Bi-direction	Gap junction	connection rate	Uni-direction rate	Bi-direction	Gap junction rate
2018.5.15	p14	G-G	4	0	0	0	YJ Zhu		G-G	181	8	7	1	1	0.0441989	0.038674	0.00552486	0.00552486
		G-N	2	0	0	0	YJ Zhu		G-N	277	33	30	3	1	0.119134	0.108303	0.0108303	0.00361011
		N-N	0	0	0	0	YJ Zhu		N-N	176	22	21	1	1	0.125	0.119318	0.00568182	0.00568182
2018.5.18	p10	G-G	10	3	0	0	YJ Zhu
		G-N	5	0	0	0	YJ Zhu
		N-N	0	0	0	0	YJ Zhu
2018.5.25	p10	G-G	8	1	0	0	YJ Zhu
		G-N	5	0	0	0	YJ Zhu
		N-N	0	0	0	0	YJ Zhu
2018.5.31	p9	G-G	9	1	0	0	YJ Zhu
		G-N	5	1	0	0	YJ Zhu
		N-N	0	0	0	0	YJ Zhu
2018.6.3	p12	G-G	14	0	0	0	YJ Zhu
		G-N	11	0	0	0	YJ Zhu
		N-N	0	0	0	0	YJ Zhu
2018.6.10	p13	G-G	14	0	1	0	YJ Zhu
		G-N	7	0	0	1	YJ Zhu
		N-N	0	0	0	0	YJ Zhu
2018.7.6	p12	G-G	6	0	0	0	YJ Zhu
		G-N	13	3	0	0	YJ Zhu
		N-N	3	0	0	0	YJ Zhu
2018.7.7	p13	G-G	2	0	0	0	YJ Zhu
		G-N	11	3	0	0	YJ Zhu
		N-N	4	1	0	0	YJ Zhu
2018.7.8	p14	G-G	4	0	0	0	YJ Zhu
		G-N	10	2	0	0	YJ Zhu
		N-N	4	2	0	0	YJ Zhu
2018.7.12	P12	G-G	14	0	0	0	YJ Zhu
		G-N	9	2	0	0	YJ Zhu
		N-N	1	0	0	0	YJ Zhu
2019,1,8	P14	G-G	1	0	0	0	YJ Zhu
		G-N	4	0	0	0	YJ Zhu
		N-N	0	0	0	0	YJ Zhu
2019.1.12	P10	G-G	12	0	0	0	YJ Zhu
		G-N	5	0	0	0	YJ Zhu
		N-N	4	0	0	0	YJ Zhu
2019.1.13	P11	G-G	6	0	0	0	YJ Zhu
		G-N	9	1	1	0	YJ Zhu
		N-N	9	1	0	0	YJ Zhu
2019.1.14	P12	G-G	0	0	0	0	YJ Zhu
		G-N	12	0	1	0	YJ Zhu
		N-N	9	2	0	0	YJ Zhu
2019.1.17	P15	G-G	5	0	0	0	YJ Zhu
		G-N	10	1	0	0	YJ Zhu
		N-N	2	0	0	0	YJ Zhu
2019,1,26	P11	G-G	11	0	0	0	YJ Zhu
		G-N	15	4	0	0	YJ Zhu
		N-N	1	0	0	0	YJ Zhu
2019.1.27	P12	G-G	1	0	0	0	YJ Zhu
		G-N	6	0	0	0	YJ Zhu
		N-N	7	3	0	0	YJ Zhu
2019.1.28	P13	G-G	7	1	0	0	YJ Zhu
		G-N	14	3	0	0	YJ Zhu
		N-N	6	2	0	0	YJ Zhu
2019.2.19	P13	G-G	0	0	0	0	YJ Zhu
		G-N	0	0	0	0	YJ Zhu
		N-N	30	3	0	0	YJ Zhu
2018.5.19	p11	G-G	9	0	0	0	CY Deng
		G-N	8	1	0	0	CY Deng
		N-N	0	0	0	0	CY Deng
2019.1.5	p11	G-G	5	1	0	0	CY Deng
		G-N	14	1	0	0	CY Deng
		N-N	3	1	0	0	CY Deng
2019.1.6	p12	G-G	4	0	0	0	CY Deng
		G-N	14	1	1	0	CY Deng
		N-N	6	0	0	0	CY Deng
2019.1.7	p13	G-G	0	0	0	0	CY Deng
		G-N	2	0	0	0	CY Deng
		N-N	3	0	0	0	CY Deng
2019.1.12	p11	G-G	1	0	0	0	CY Deng
		G-N	8	1	0	0	CY Deng
		N-N	6	0	0	0	CY Deng
2019.1.13	p12	G-G	1	0	0	0	CY Deng
		G-N	12	1	0	0	CY Deng
		N-N	9	1	0	0	CY Deng
2019.1.14	p13	G-G	1	0	0	0	CY Deng
		G-N	15	0	0	0	CY Deng
		N-N	7	0	0	0	CY Deng
2019.1.26	p11	G-G	15	0	0	0	CY Deng
		G-N	17	1	0	0	CY Deng
		N-N	0	0	0	0	CY Deng
2019.1.27	p12	G-G	4	0	0	0	CY Deng
		G-N	17	2	0	0	CY Deng
		N-N	9	0	0	1	CY Deng
2019.1.28	p13	G-G	4	0	0	0	CY Deng
		G-N	14	2	0	0	CY Deng
		N-N	10	2	0	0	CY Deng
2019.2.18	p12	G-G	0	0	0	0	CY Deng
		G-N	0	0	0	0	CY Deng
		N-N	12	1	0	0	CY Deng
2019.2.19	p13	G-G	0	0	0	0	CY Deng
		G-N	0	0	0	0	CY Deng
		N-N	31	2	1	0	CY Deng

## Sheet: Fig.3E-1 isoform
Date	Age		Total	Uni-direction	Bi-direction	Gap junction
2017.7.8	p10	G-G	8	0	0	0	CY Deng
		G-N	7	0	0	0	CY Deng
		N-N	1	0	0	0	CY Deng
2017.7.9	p11	G-G	1	0	0	0	CY Deng
		G-N	3	0	0	0	CY Deng		Summary for Fig.3E- 1 isoform
		N-N	0	0	0	0	CY Deng			Total	connection	Uni-direction	Bi-direction	Gap junction	connection rate	Uni-direction rate	Bi-direction	Gap junction rate
2017.7.11	p13	G-G	9	0	0	0	CY Deng		G-G	216	4	4	0	0	0.0185185	0.0185185	0	0
		G-N	15	2	0	0	CY Deng		G-N	384	28	28	0	0	0.0729167	0.0729167	0	0
		N-N	3	0	0	0	CY Deng		N-N	302	37	37	0	1	0.122517	0.122517	0	0.00331126
2017.7.17	p13	G-G	7	0	0	0	CY Deng
		G-N	14	0	0	0	CY Deng
		N-N	3	0	0	0	CY Deng
2017.7.18	p14	G-G	1	0	0	0	CY Deng
		G-N	7	1	0	0	CY Deng
		N-N	4	2	0	0	CY Deng
2017.7.23	p12	G-G	3	0	0	0	CY Deng
		G-N	8	0	0	0	CY Deng
		N-N	0	0	0	0	CY Deng
2017.7.30	p10	G-G	6	0	0	0	CY Deng
		G-N	14	1	0	0	CY Deng
		N-N	2	0	0	0	CY Deng
2017.8.1	p12	G-G	3	0	0	0	CY Deng
		G-N	9	2	0	0	CY Deng
		N-N	1	1	0	0	CY Deng
2017.8.8	p14	G-G	7	1	0	0	CY Deng
		G-N	8	1	0	0	CY Deng
		N-N	0	0	0	0	CY Deng
2017.8.12	p10	G-G	22	2	0	0	CY Deng
		G-N	8	3	0	0	CY Deng
		N-N	0	0	0	0	CY Deng
2017.8.13	p11	G-G	24	0	0	0	CY Deng
		G-N	18	0	0	0	CY Deng
		N-N	0	0	0	0	CY Deng
2017.8.15	p13	G-G	6	0	0	0	CY Deng
		G-N	8	1	0	0	CY Deng
		N-N	0	0	0	0	CY Deng
2017.8.19	p13	G-G	13	0	0	0	CY Deng
		G-N	17	0	0	0	CY Deng
		N-N	1	0	0	0	CY Deng
2017.8.22	p13	G-G	10	0	0	0	CY Deng
		G-N	18	1	0	0	CY Deng
		N-N	3	1	0	0	CY Deng
2017.8.23	p14	G-G	5	0	0	0	CY Deng
		G-N	9	1	0	0	CY Deng
		N-N	2	1	0	0	CY Deng
2017.9.2	p11	G-G	7	0	0	0	CY Deng
		G-N	12	1	0	0	CY Deng
		N-N	3	0	0	0	CY Deng
2017.9.3	p12	G-G	3	0	0	0	CY Deng
		G-N	11	0	0	0	CY Deng
		N-N	2	0	0	0	CY Deng
2017.9.4	p13	G-G	3	1	0	0	CY Deng
		G-N	12	1	0	0	CY Deng
		N-N	3	1	0	0	CY Deng
2017.9.23	p13	G-G	10	0	0	0	CY Deng
		G-N	13	1	0	0	CY Deng
		N-N	3	0	0	0	CY Deng
2017.9.30	p10	G-G	10	0	0	0	CY Deng
		G-N	12	0	0	0	CY Deng
		N-N	1	0	0	0	CY Deng
2017.10.1	p12	G-G	7	0	0	0	CY Deng
		G-N	11	0	0	0	CY Deng
		N-N	1	0	0	0	CY Deng
2018.2.3	p11	G-G	8	0	0	0	CY Deng
		G-N	14	0	0	0	CY Deng
		N-N	2	0	0	0	CY Deng
2018.2.4	p12	G-G	2	0	0	0	CY Deng
		G-N	2	0	0	0	CY Deng
		N-N	0	0	0	0	CY Deng
2018.2.5	p13	G-G	13	0	0	0	CY Deng
		G-N	12	1	0	0	CY Deng
		N-N	1	0	0	0	CY Deng
2018.2.6	p14	G-G	6	0	0	0	CY Deng
		G-N	8	0	0	0	CY Deng
		N-N	1	0	0	0	CY Deng
2018.2.11	p12	G-G	5	0	0	0	CY Deng
		G-N	10	2	0	0	CY Deng
		N-N	1	1	0	0	CY Deng
2018.2.12	p13	G-G	7	0	0	0	CY Deng
		G-N	7	1	0	0	CY Deng
		N-N	0	0	0	0	CY Deng
2018.2.13	p14	G-G	3	0	0	0	CY Deng
		G-N	12	0	0	0	CY Deng
		N-N	3	1	0	0	CY Deng
2018.2.26	p13	G-G	6	0	0	0	CY Deng
		G-N	2	0	0	0	CY Deng
		N-N	0	0	0	0	CY Deng
2018.5.26	p11	G-G	0	0	0	0	CY Deng
		G-N	12	2	0	0	CY Deng
		N-N	14	0	0	0	CY Deng
2019.5.27	p11	G-G	0	0	0	0	CY Deng
		G-N	0	0	0	0	CY Deng
		N-N	19	0	0	1	CY Deng
2019.5.28	p12	G-G	0	0	0	0	CY Deng
		G-N	6	1	0	0	CY Deng
		N-N	22	3	0	0	CY Deng
2019.6.3	p13	G-G	0	0	0	0	CY Deng
		G-N	4	1	0	0	CY Deng
		N-N	33	2	0	0	CY Deng
2019.6.15	p11	G-G	0	0	0	0	CY Deng
		G-N	7	1	0	0	CY Deng
		N-N	23	3	0	0	CY Deng
2019.6.16	p11	G-G	0	0	0	0	CY Deng
		G-N	5	0	0	0	CY Deng
		N-N	21	1	0	0	CY Deng
2019.6.17	p12	G-G	0	0	0	0	CY Deng
		G-N	5	0	0	0	CY Deng
		N-N	20	3	0	0	CY Deng
2019.6.18	p13	G-G	0	0	0	0	CY Deng
		G-N	1	0	0	0	CY Deng
		N-N	29	6	0	0	CY Deng
2019.5.26	p11	G-G	1	0	0	0	YJ Zhu
		G-N	10	0	0	0	YJ Zhu
		N-N	22	2	0	0	YJ Zhu
2019.5.28	p12	G-G	0	0	0	0	YJ Zhu
		G-N	10	2	0	0	YJ Zhu
		N-N	16	2	0	0	YJ Zhu
2019.6.16	p11	G-G	0	0	0	0	YJ Zhu
		G-N	8	0	0	0	YJ Zhu
		N-N	12	1	0	0	YJ Zhu
2019.6.18	p13	G-G	0	0	0	0	YJ Zhu
		G-N	15	1	0	0	YJ Zhu
		N-N	30	6	0	0	YJ Zhu

## Sheet: Fig.3E- Ctrl
Date	Age		total	Uni-direction	Bi-direction	Gap junction	experimenter
2019.6.22	p10	P-P	1	0	0	0	YJ Zhu		Summary for Fig.3E- control
		P-N	15	1	0	0	YJ Zhu			Total	connection	Uni-direction	Bi-direction	Gap junction	connection rate	Uni-direction rate	Bi-direction	Gap junction rate
		N-N	19	1	0	0	YJ Zhu		P-P	146	15	15	0	0	0.10274	0.10274	0	0
2019.6.24	P12	P-P	2	0	0	0	YJ Zhu		P-N	252	23	20	3	0	0.0912698	0.0793651	0.0119048	0
		P-N	16	1	0	0	YJ Zhu		N-N	124	12	12	0	0	0.0967742	0.0967742	0	0
		N-N	12	0	0	0	YJ Zhu
2019.6.30	P12	P-P	1	0	0	0	YJ Zhu
		P-N	12	2	0	0	YJ Zhu
		N-N	14	1	0	0	YJ Zhu
2019.7.2	P14	P-P	2	0	0	0	YJ Zhu
		P-N	18	1	0	0	YJ Zhu
		N-N	15	3	0	0	YJ Zhu
2021.7.2	P10	P-P	11	0	0	0	YJ Zhu
		P-N	29	3	0	0	YJ Zhu
		N-N	11	1	0	0	YJ Zhu
2021.7.3	P11	P-P	10	0	0	0	YJ Zhu
		P-N	16	2	0	0	YJ Zhu
		N-N	7	1	0	0	YJ Zhu
2021.7.4	P12	P-P	22	4	0	0	YJ Zhu
		P-N	26	1	0	0	YJ Zhu
		N-N	12	1	0	0	YJ Zhu
2021.7.16	P11	P-P	15	3	0	0	YJ Zhu
		P-N	14	2	2	0	YJ Zhu
		N-N	2	0	0	0	YJ Zhu
2018.6.22	p10	G-G	3	1	0	0	CY Deng
		G-N	8	0	0	0	CY Deng
		N-N	20	4	0	0	CY Deng
2019.6.24	p12	G-G	0	0	0	0	CY Deng
		G-N	0	0	0	0	CY Deng
		N-N	6	0	0	0	CY Deng
2017.9.26	p14	G-G	5	1	0	0	CY Deng
		G-N	10	2	0	0	CY Deng
		N-N	2	0	0	0	CY Deng
2017.10.14	p10	G-G	8	2	0	0	CY Deng
		G-N	10	1	0	0	CY Deng
		N-N	0	0	0	0	CY Deng
2017.10.15	p11	G-G	11	0	0	0	CY Deng
		G-N	15	1	0	0	CY Deng
		N-N	1	0	0	0	CY Deng
2017.10.16	p12	G-G	15	0	0	0	CY Deng
		G-N	12	1	0	0	CY Deng
		N-N	0	0	0	0	CY Deng
2017.10.21	p10	G-G	6	1	0	0	CY Deng
		G-N	9	0	1	0	CY Deng
		N-N	1	0	0	0	CY Deng
2017.10.22	p11	G-G	11	1	0	0	CY Deng
		G-N	17	1	0	0	CY Deng
		N-N	1	0	0	0	CY Deng
2017.10.31	p11	G-G	8	0	0	0	CY Deng
		G-N	7	1	0	0	CY Deng
		N-N	1	0	0	0	CY Deng
2017.11.11	p13	G-G	7	1	0	0	CY Deng
		G-N	8	0	0	0	CY Deng
		N-N	0	0	0	0	CY Deng
2017.11.12	p14	G-G	8	1	0	1	CY Deng
		G-N	10	0	0	0	CY Deng
		N-N	0	0	0	0	CY Deng

## Sheet: Fig.3E- gC4
Date	Age		total	Uni-direction	Bi-direction	Gap junction	experimenter
2022-07-22	p12	P-P	13	1	0	0	YJ Zhu
		P-N	9	1	0	0	YJ Zhu
		N-N	0	0	0	0	YJ Zhu
2022-07-23	p13	P-P	21	0	0	0	YJ Zhu	Summary for Fig.3E-gC4
		P-N	18	2	1	0	YJ Zhu		Total	connection	Uni-direction	Bi-direction	Gap junction	connection rate	Uni-direction rate	Bi-direction	Gap junction rate
		N-N	2	0	0	0	YJ Zhu	P-P	106	12	9	3	0	0.113208	0.0849057	0.0283019	0
2022-08-08	p10	P-P	3	0	0	0	YJ Zhu	P-N	131	12	11	1	0	0.0916031	0.0839695	0.00763359	0
		P-N	12	0	0	0	YJ Zhu	N-N	50	5	5	0	0	0.1	0.1	0	0
		N-N	4	1	0	0	YJ Zhu
2022-08-09	p11	P-P	8	0	0	0	YJ Zhu
		P-N	21	4	0	0	YJ Zhu
		N-N	7	1	0	0	YJ Zhu
2022-08-10	p12	P-P	23	2	1	0	YJ Zhu
		P-N	12	0	0	0	YJ Zhu
		N-N	2	0	0	0	YJ Zhu
2022-08-11	p13	P-P	21	3	1	0	YJ Zhu
		P-N	34	2	0	0	YJ Zhu
		N-N	6	2	0	0	YJ Zhu
2022-08-16	p10	P-P	0	0	0	0	YJ Zhu
		P-N	17	1	0	0	YJ Zhu
		N-N	28	1	0	0	YJ Zhu
2022-08-19	p13	P-P	17	3	1	0	YJ Zhu
		P-N	8	1	0	0	YJ Zhu
		N-N	1	0	0	0	YJ Zhu

## Sheet: Fig.3F-cKO
Date	Age		total	Uni-direction	Bi-direction	Gap junction	G->N+N->G
2022-09-16	E15p12	P-P	35	1	0	0	L Fan
		P-N	20	4	1	0	L Fan
		N-N	0	0	0	0	L Fan
2022-09-16	E15p12	P-P	51	3	0	0	YJ Zhu	Summary for Fig.3F-cKO
		P-N	27	3	0	0	YJ Zhu		Total	connection	Uni-direction	Bi-direction	Gap junction	connection rate	Uni-direction rate	Bi-direction	Gap junction rate
		N-N	2	0	0	0	YJ Zhu	P-P	198	12	12	0	0	0.0606061	0.0606061	0	0
2022-10-26	E15p12	P-P	22	1	0	0	YJ Zhu	P-N	188	31	28	3	0	0.164894	0.148936	0.0159574	0
		P-N	33	5	0	0	YJ Zhu	N-N	63	8	8	0	0	0.126984	0.126984	0	0
		N-N	6	1	0	0	YJ Zhu
2022-10-26	E15p12	P-P	31	5	0	0	L Fan
		P-N	32	4	1	0	L Fan
		N-N	0	0	0	0	L Fan
2022-11-05	E15p11	P-P	28	0	0	0	YJ Zhu
		P-N	29	6	1	0	YJ Zhu
		N-N	3	0	0	0	YJ Zhu
2022-11-06	E15p12	P-P	6	0	0	0	YJ Zhu
		P-N	16	3	0	0	YJ Zhu
		N-N	25	2	0	0	YJ Zhu
2022-11-06	E15p12	P-P	19	2	0	0	L Fan
		P-N	17	0	0	0	L Fan
		N-N	1	0	0	0	L Fan
2022-11-07	E15p13	P-P	6	0	0	0	YJ Zhu
		P-N	14	3	0	0	YJ Zhu
		N-N	26	5	0	0	YJ Zhu

## Sheet: Fig.3F-Ctrl
Date	Age		total	Uni-direction	Bi-direction	Gap junction	experimenter
2022-10-07	E15p13	P-P	22	1	0	0	YJ Zhu
		P-N	25	3	1	0	YJ Zhu
		N-N	3	0	0	0	YJ Zhu	Summary for Fig.3F-Ctrl
2022-11-08	E15p14	P-P	26	0	0	0	YJ Zhu		Total	connection	Uni-direction	Bi-direction	Gap junction	connection rate	Uni-direction rate	Bi-direction	Gap junction rate
		P-N	20	2	1	0	YJ Zhu	P-P	121	8	8	0	0	0.0661157	0.0661157	0	0
		N-N	1	0	0	0	YJ Zhu	P-N	109	18	16	2	0	0.165138	0.146789	0.0183486	0
2022-11-08	E15p14	P-P	18	3	0	0	L Fan	N-N	6	0	0	0	0	0	0	0	0
		P-N	15	2	0	0	L Fan
		N-N	0	0	0	0	L Fan
2022-11-24	E15p11	P-P	34	2	0	0	YJ Zhu
		P-N	26	2	0	0	YJ Zhu
		N-N	1	0	0	0	YJ Zhu
2022-11-24	E15p11	P-P	21	2	0	0	L Fan
		P-N	23	7	0	0	L Fan
		N-N	1	0	0	0	L Fan
