# Supplementary material for: Combinatorial expression of γ-protocadherins regulates synaptic connectivity in the mouse neocortex
Source: eLife. 2024 Mar 12;12:RP89532. doi: 10.7554/eLife.89532 (PMC10932546; doi:10.7554/eLife.89532)
Supplement: Supplementary file 1. — (1) Primers for ‘library construction for 5' end single-cell sequencing’. (2) Primers for confirming the generation of pcdha cKO mice. (3) Primers for qRT-PCR. (4) Primers for single-cell RT-PCR. [file elife-89532-supp1.xlsx]

## Sheet: Sheet1
Primer List
Primer name	Sequence (5'-3')	Working conc.(μM)
	Library construction for 5’ end single-cell sequencing
Outer R1	GTAAACTGGGGTCCGTATC	1
Inner R1	CATTTTGGGATCCGCTCGT	0.5
	Generation of pcdha cKO mice
Southern probe A	CGGGGGTAAGTATAGTTTGAACTTTGAACCCATTGCCTGGCACTGCAACCGCTTTATGTTGCTATGATCATTGTAACCTAGAAGAAATCCCCCCTTCCATTTCCAGTTTAGTATCCATGCCTGATTTAGTCTCTAGTGATTCCGAGTACCTTCTGGCTCCCCACCAGTCTTCAGGTGCCATATTTTCTTCTTTATCAATTCTACTTTGGAATGACAGTTTGTGGGCAGAGGGCACACAAATTTTCTTTCTAGGACACAGGTGGTGCAGAAAGAGTTGGAGTCCTTGTGGATTTCATCTACTTCCTGCTAAGCAATCAGAGCCTAGTGAATCAGGAGGTAAAGCATGAGAAAGGGGCAGGGAGCCAGTGCAGATTTACAAGTAGGTTTGGGTAGCCAAACA
Southern probe B	CTGACTTGAATCAGACTTCCTTTGCATATTATAATATAGCCTTAATTAATTTGATTAGCATAATAATATTTTGATCATTATTGAACAAGTAGCAGTGGTTTAAAAATTCAGAGGTCAAGAGAACTCTTTAGCTATGTTTCAAAAACAGGTGTTCTTAAAAGTGGCTTTTACAGGACCCCACTTGGATCATAGTTTCTATGAATATTAAATATGAACATAATTCACCTGATTAATATAATAACATCTTGACCAATATTTAAACCAGTAGCCATGATTTTAAAATTTATAAGTCAAGAGAATTCTTTAACAATGCTTTAAATTTGTTAACCTAAAAATTATACAAGCTCTTTCAAGAATTTGAACTTGGCACATGCAAAGAAATATCTGACATTGCAAAGG…
Target1_1F	AGTTTGCAGACACCTGTTGGAACC	0.25
Target1_1R	CTCCTTACTTACCACAGGGACTGA	0.25
Target1_2F	GTAATGGTGGTGCAGGCCCTA	0.25
Target1_2R	GCAGCCTCAGAGGAAGTGCA	0.25
Target1_3F	CCAAATGGGGGAAAGCCCAG	0.25
Target1_3R	GGAGGTCAGAGGTCAATTCATGG	0.25
Target1_4F	AGCAAGCAAGAAGGGTCAAGGACA	0.25
Target1_4R	AACCCAGACATTGCCCTTGGTTG	0.25
Target1_5F	GCTGGATGTTTTGACTCTGTTGGG	0.25
Target1_5R	GAGCCAGAAACTGGGAACAACC	0.25
Target1_6F	GCTTTCACATCCATGTCACAGTCC	0.25
Target1_6R	GCTGGCATTTCTCCTTATGCTTCC	0.25
Target1_7F	GAACATTCTCCCCAAGTGTCAAGG	0.25
Target1_7R	AGAACCTCTAGAAAGGTCCCAGTC	0.25
Target1_8F	GCTGGGGTAGTCACATCTAGATC	0.25
Target1_8R	TTACCAATGGCCTGGCCTTGGCT	0.25
Target1_9F	TCAAGGCAGAGGAGAAGGGC	0.25
Target1_9R	GGCTTTCCAGTCTTCACAACCATC	0.25
Target1_10F	GTGGTCAATGTCAGTCAATGTCCC	0.25
Target1_10R	AGGATACTTGAGGGTACCCAAGG	0.25
Target2_1F	GGCAGAGGTCATCACTGAGTTC	0.25
Target2_1R	CCTAGCTACTTCCTAGCAACAGTC	0.25
Target2_2F	GGGTTTGTGAAACCTCAGATCTGC	0.25
Target2_2R	CCTAGGCTATCCAAGGCCTC	0.25
Target2_3F	ACCTGGCACACAGATTTGGATGAC	0.25
Target2_3R	GCCTAATGGCCTGGGTTTTATCC	0.25
Target2_4F	GTGGCTGCCAGTCTGACTGT	0.25
Target2_4R	CGCTTCTCCCATTGGTGAAGTG	0.25
Target2_5F	GACTGTAATGTCTGCGGTAACTGC	0.25
Target2_5R	GACCAAGTCAGGGGCAGCTTA	0.25
Target2_6F	GCTCCTTTTGGATTGTCCCTTCCT	0.25
Target2_6R	GGACCCTCTTGATGCCTCTATG	0.25
Target2_7F	AGACCTCAGCTCCCTTAATACTGC	0.25
Target2_7R	GGTTTTGCCCCAGCAGGTGA	0.25
Target2_8F	AACGGGTTCACTGCTCTGTGG	0.25
Target2_8R	GTCACCCTAGTTAGGACAAAGCAG	0.25
Target2_9F	GATTTTGAGTGTCAGGCAAGCGG	0.25
Target2_9R	GCAGGAAGGATCAGAAGTTCAAGG	0.25
Target2_10F	TCCATCTCTTCTTCTCGGTAAGGC	0.25
Target2_10R	CTCAGAACTCAGGAGGCAGG	0.25
	qRT-PCR
Ga2 qPCR F	GATGCGGACGTTGGAGAGAA	0.5
Ga2 qPCR R	CGTCAGAGGCGACTAGAACC	0.5
Ga8 qPCR F	TCAGCGTAGGACAGATTCGC	0.5
Ga8 qPCR R	CGACCTACCTCTGGAGACGA	0.5
Ga9 qPCR F	TCAGTTGAGCCCAAGTTTCCT	0.5
Ga9 qPCR R	TCACCATTTTGGGATCCGCT	0.5
Ga10 qPCR F	AATCTCTCAGAGCGCACCAAA	0.5
Ga10 qPCR R	CCTACCTCTGGAGATGATGCG	0.5
Ga11 qPCR F	AGACTCAACTACAGTTTTAGGCA	0.5
Ga11 qPCR R	TGGGTGTGAGCGTTATTCCG	0.5
Gb1 qPCR F	ATGAGGGGACATTACCCTATTCC	0.5
Gb1 qPCR R	GCGGGGCTTGCTGGAAA	0.5
Gb2 qPCR F	TCAACCTGGCCTCAGCTCTA	0.5
Gb2 qPCR R	CTGGTACCCAAGAGTCGTCG	0.5
Gb6 qPCR F	TCGTTTCCGGTAGTTCTCCTG	0.5
Gb6 qPCR R	GGCTTGAGAGAAACGCCAGT	0.5
GC3 qPCR F	AAGCGCTAACCCGCTGAAAG	0.5
GC3 qPCR R	GCAGAAGCAAAACTCCCACC	0.5
GC4 qPCR F	TCCACGATGATAACGAGCCC	0.5
GC4 qPCR R	CGTCGTAGCATTGGGAGGAA	0.5
Pcdha qPCR F	TACTCTGCCTCGCTAAGAGC	0.5
Pcdha qPCR R	TGGTGTTGCACTGGATACTG	0.5
	Single-cell RT-PCR
Gb F1a	GACACAATGCCTGGCTGTC	0.13
Gb F1b	GACACAATGCCTGGCTATC	0.05
GR1 (also as RT primer)	TCGTTTGCCAGCGGCATTG	0.5
Gb1 f2	CACATTCTACGACTATGGCAGG	0.1
Gb2 f2	ACCAGGTACTCTTGGAGACAC	0.1
Gb4 f2	CTACAATTTGCAGATTCAGCG	0.1
Gb5 f2	ATGGTGCACATGCTGGAAAGAC	0.1
Gb6 f2	CGTTGGGCAAACGGGAAAGG	0.1
Gb7 f2	GCCGGGAGATCAACTTAAAC	0.1
Gb8 f2	GAGTGTCGCTGAGGAGAATA	0.1
GR2	ATTGGTCAGCGTGGCATTGCT	0.1
Ga F1a	CCTCTCTCCGCCACTGTCA	0.1
Ga F1b	TCTACCTGGTGGTGGCAGT	0.05
Ga F1c	TGGTGGCAGTGGACAGAGA	0.05
Ga F1d	TGGTGGCAGTGGACAAAGA	0.1
Ga1 f2	CAGGAATTTTTGTCAGCACC	0.1
Ga2 f2	CTGATTTCCTCTCAGCACCTC	0.1
Ga3 f2	ACGAAAGAAGACCCCACGCTG	0.1
Ga4 f2	ATAAAAGGAGACTCCAGTCTGCAG	0.1
Ga5 f2	CACAAAGAAGAGCCCGGAGATG	0.1
Ga6 f2	GAAAGGTGTGTCAAATATGTCC	0.1
Ga7 f2	TTCAGGTGGTGGCCTGGAAGAT	0.1
Ga8 f2	GATGAAGATGCTTGCGCTCCG	0.1
Ga9 f2	GCAGTTCAGTTGAGCCCAAGT	0.1
Ga10 f2	CAAGTGTCCTGTAGAAGACG	0.1
Ga11 f2	GACTCAACTACAGTTTTAGGC	0.1
Ga12 f2	GGCAGATCTAGACAATCTAG	0.1
β-actin F	GTCGTACCACAGGCATTGTGATGG	0.5
β-actin R1	CTAGAAGCACTTGCGGTGC	0.5
β-actin R2	GCAATGCCTGGGTACATGGTGG	0.1
